# Supplementary material for: A Large Fraction of Extragenic RNA Pol II Transcription Sites Overlap Enhancers
Source: PLoS Biol. 2010 May 11;8(5):e1000384. doi: 10.1371/journal.pbio.1000384 (PMC2867938; doi:10.1371/journal.pbio.1000384)
Supplement: Table S4 — Promoter and enhancer predictions. The extragenic Pol_II peaks were analyzed for chromatin signatures of enhancers or promoters using a machine-learning algorithm (described in the methods section). The table shows the prediction for each Pol_II peak. Peaks whose prediction was precluded are grouped. The table also shows the final dataset used for most of the analysis that resulted from a clustering and filtering procedure (described in the Methods section) of the Pol_II peaks predicted as promoters or enhancers. For each cluster the annotation of the closest neighboring UCSC known gene as well as the total number of RNA-seq transcripts, Q-PCR amplicons, and RNA repeats are shown. (1.29 MB XLS) [file pbio.1000384.s012.xls]

## Sheet: Final_clusters
ID	PolII class	Prediction class	Chromosome	Start	End	RNA-seq tx	qPCR validation	RNA repeats	UCSC known gene	txStart	txEnd	Strand	Position	TSS distance
C1	Constitutive	Promoters	chr1	10870073	10870354	0	0	0	intergenic	10870074	10870354	+	OUT	-22000
C2	Repressed	Promoters	chr1	13413791	13414080	0	0	0	intergenic	13413792	13414080	+	OUT	-22000
C3	Repressed	Enhancers	chr1	13416463	13417017	0	0	0	intergenic	13416464	13417017	+	OUT	-22000
C4	Constitutive	Promoters	chr1	13503883	13504378	0	0	0	intergenic	13503884	13504378	+	OUT	-22000
C5	Induced	Promoters	chr1	16151467	16151622	-	0	0	intergenic	16151468	16151622	+	OUT	-22000
C6	Induced	Promoters	chr1	23406384	23406830	-	0	0	uc007amc.1	23398587	23404611	-	promoter	-1996
C7	Repressed	Enhancers	chr1	31106931	31107113	0	0	0	intergenic	31106932	31107113	+	OUT	-22000
C8	Induced	Enhancers	chr1	36360130	36360472	-	0	0	uc007apu.1	36364598	36379820	+	promoter	-4296
C9	Repressed	Promoters	chr1	36503035	36503912	0	0	0	uc007aqd.1	36480030	36502084	-	promoter	-1390
C10	Induced	Promoters	chr1	37004317	37004550	-	0	0	uc007ard.1	36849033	36996372	-	promoter	-8062
C11	Induced	Enhancers	chr1	37043186	37045383	-	0	0	intergenic	37043187	37045383	+	OUT	-22000
C12	Induced	Enhancers	chr1	37057245	37057868	-	0	0	intergenic	37057246	37057868	+	OUT	-22000
C13	Repressed	Enhancers	chr1	39539079	39539391	0	0	0	uc007atg.1	39428344	39535580	-	promoter	-3655
C14	Constitutive	Enhancers	chr1	39550003	39550435	0	0	0	uc007atg.1	39428344	39535580	-	promoter	-14639
C15	Repressed	Enhancers	chr1	39559863	39560272	0	0	0	intergenic	39559864	39560272	+	OUT	-22000
C16	Repressed	Enhancers	chr1	39659515	39660664	0	0	0	intergenic	39659516	39660664	+	OUT	-22000
C17	Repressed	Enhancers	chr1	39791105	39791528	0	0	0	uc007atn.1	39722150	39777834	-	promoter	-13483
C18	Repressed	Promoters	chr1	39818150	39818372	0	0	0	intergenic	39818151	39818372	+	OUT	-22000
C19	Repressed	Enhancers	chr1	40449703	40449978	0	0	0	intergenic	40449704	40449978	+	OUT	-22000
C20	Repressed	Enhancers	chr1	40461693	40461907	0	0	0	intergenic	40461694	40461907	+	OUT	-22000
C21	Repressed	Enhancers	chr1	45925782	45926046	0	0	0	intergenic	45925783	45926046	+	OUT	-22000
C22	Repressed	Enhancers	chr1	45938897	45939124	0	0	0	intergenic	45938898	45939124	+	OUT	-22000
C23	Repressed	Enhancers	chr1	46930428	46931045	0	0	0	intergenic	46930429	46931045	+	OUT	-22000
C24	Constitutive	Enhancers	chr1	55863853	55864337	0	0	0	intergenic	55863854	55864337	+	OUT	-22000
C25	Constitutive	Enhancers	chr1	58830141	58830475	0	0	0	intergenic	58830142	58830475	+	OUT	-22000
C26	Constitutive	Enhancers	chr1	59515744	59516055	0	0	0	intergenic	59515745	59516055	+	OUT	-22000
C27	Repressed	Enhancers	chr1	60684121	60684962	0	0	0	intergenic	60684122	60684962	+	OUT	-22000
C28	Repressed	Enhancers	chr1	62725134	62725879	0	0	0	intergenic	62725135	62725879	+	OUT	-22000
C29	Repressed	Enhancers	chr1	64235935	64236668	0	0	0	intergenic	64235936	64236668	+	OUT	-22000
C30	Repressed	Enhancers	chr1	64238337	64240049	0	0	0	intergenic	64238338	64240049	+	OUT	-22000
C31	Constitutive	Enhancers	chr1	64342108	64342561	0	0	0	intergenic	64342109	64342561	+	OUT	-22000
C32	Constitutive	Promoters	chr1	64349134	64350010	0	0	0	intergenic	64349135	64350010	+	OUT	-22000
C33	Repressed	Enhancers	chr1	64385071	64385299	0	0	0	intergenic	64385072	64385299	+	OUT	-22000
C34	Repressed	Enhancers	chr1	64420322	64422536	0	0	0	intergenic	64420323	64422536	+	OUT	-22000
C35	Repressed	Promoters	chr1	72272835	72274065	1	0	1	uc007bkg.1	72206018	72258881	-	promoter	-14569
C36	Repressed	Promoters	chr1	72283648	72285251	0	0	1	uc007bkh.1	72290566	72321443	+	promoter	-6116
C37	Repressed	Enhancers	chr1	74247503	74247862	0	0	0	uc007blm.1	74238359	74241205	-	promoter	-6478
C38	Constitutive	Enhancers	chr1	74273790	74274323	0	0	0	uc007bln.1	74283091	74314787	+	promoter	-9034
C39	Constitutive	Promoters	chr1	74863274	74864178	1	0	1	intergenic	74863275	74864178	+	OUT	-22000
C40	Induced	Enhancers	chr1	80450504	80450733	-	0	0	intergenic	80450505	80450733	+	OUT	-22000
C41	Constitutive	Enhancers	chr1	82794657	82795756	0	0	0	intergenic	82794658	82795756	+	OUT	-22000
C42	Constitutive	Enhancers	chr1	82828345	82829288	0	0	0	uc007bse.1	82836057	82892850	+	promoter	-7240
C43	Repressed	Enhancers	chr1	84344747	84344961	0	0	0	uc007bsu.1	84111906	84337685	-	promoter	-7169
C44	Repressed	Enhancers	chr1	84347214	84347454	0	0	0	uc007bsu.1	84111906	84337685	-	promoter	-9649
C45	Repressed	Enhancers	chr1	84356178	84356385	0	0	0	uc007bsu.1	84111906	84337685	-	promoter	-18597
C46	Induced	Enhancers	chr1	88313706	88313944	-	0	0	uc007bvo.1	88322904	88324615	+	promoter	-9078
C47	Constitutive	Promoters	chr1	88337707	88339937	2	0	0	intergenic	88337708	88339937	+	OUT	-22000
C48	Constitutive	Enhancers	chr1	88367052	88368008	0	0	0	intergenic	88367053	88368008	+	OUT	-22000
C49	Induced	Enhancers	chr1	88368498	88369709	-	1	0	intergenic	88368499	88369709	+	OUT	-22000
C50	Induced	Promoters	chr1	88383628	88385077	-	0	0	intergenic	88383629	88385077	+	OUT	-22000
C51	Constitutive	Enhancers	chr1	88388561	88389616	0	0	0	intergenic	88388562	88389616	+	OUT	-22000
C52	Constitutive	Promoters	chr1	88399842	88401406	1	0	0	intergenic	88399843	88401406	+	OUT	-22000
C53	Repressed	Enhancers	chr1	89076627	89079029	0	1	0	uc007bwe.1	89083239	89084978	+	promoter	-5410
C54	Induced	Promoters	chr1	90183982	90184200	-	0	0	uc007bym.1	90159683	90174132	-	promoter	-9959
C55	Repressed	Enhancers	chr1	90371012	90371727	0	0	0	intergenic	90371013	90371727	+	OUT	-22000
C56	Constitutive	Enhancers	chr1	90471997	90473349	0	0	0	intergenic	90471998	90473349	+	OUT	-22000
C57	Repressed	Enhancers	chr1	90483441	90485287	0	0	0	intergenic	90483442	90485287	+	OUT	-22000
C58	Repressed	Enhancers	chr1	90533293	90533616	0	0	0	intergenic	90533294	90533616	+	OUT	-22000
C59	Repressed	Enhancers	chr1	90539442	90539645	0	0	0	intergenic	90539443	90539645	+	OUT	-22000
C60	Repressed	Enhancers	chr1	90549369	90549704	0	0	0	intergenic	90549370	90549704	+	OUT	-22000
C61	Repressed	Enhancers	chr1	90551297	90552341	0	0	0	intergenic	90551298	90552341	+	OUT	-22000
C62	Repressed	Enhancers	chr1	90557837	90558009	0	0	0	intergenic	90557838	90558009	+	OUT	-22000
C63	Induced	Promoters	chr1	90912037	90912307	-	0	0	intergenic	90912038	90912307	+	OUT	-22000
C64	Induced	Enhancers	chr1	90937964	90938216	-	0	0	intergenic	90937965	90938216	+	OUT	-22000
C65	Repressed	Enhancers	chr1	94111953	94113667	0	0	0	intergenic	94111954	94113667	+	OUT	-22000
C66	Induced	Promoters	chr1	94671351	94671791	-	0	0	intergenic	94671352	94671791	+	OUT	-22000
C67	Induced	Enhancers	chr1	95061972	95062233	-	0	0	uc007cdk.1	95047932	95057525	-	promoter	-4578
C68	Constitutive	Enhancers	chr1	97277001	97277782	0	0	0	intergenic	97277002	97277782	+	OUT	-22000
C69	Repressed	Promoters	chr1	103798445	103799349	2	0	0	intergenic	103798446	103799349	+	OUT	-22000
C70	Induced	Enhancers	chr1	107760187	107763511	-	0	0	intergenic	107760188	107763511	+	OUT	-22000
C71	Induced	Enhancers	chr1	107802921	107803207	-	0	0	intergenic	107802922	107803207	+	OUT	-22000
C72	Induced	Promoters	chr1	107818489	107818935	-	0	0	intergenic	107818490	107818935	+	OUT	-22000
C73	Induced	Enhancers	chr1	107819648	107819967	-	0	0	intergenic	107819649	107819967	+	OUT	-22000
C74	Induced	Enhancers	chr1	107821407	107823251	-	0	0	intergenic	107821408	107823251	+	OUT	-22000
C75	Induced	Enhancers	chr1	107845041	107845425	-	0	0	intergenic	107845042	107845425	+	OUT	-22000
C76	Induced	Enhancers	chr1	107861425	107862119	-	0	0	intergenic	107861426	107862119	+	OUT	-22000
C77	Induced	Promoters	chr1	107867699	107869320	-	0	0	uc007cgq.1	107886982	107930130	+	promoter	-18472
C78	Induced	Enhancers	chr1	107877279	107881072	-	0	0	uc007cgq.1	107886982	107930130	+	promoter	-7806
C79	Repressed	Enhancers	chr1	108304588	108304851	0	0	0	intergenic	108304589	108304851	+	OUT	-22000
C80	Repressed	Enhancers	chr1	108828145	108829288	0	0	0	uc007chc.1	108831025	108853655	+	promoter	-2308
C81	Repressed	Enhancers	chr1	109393575	109394770	0	0	0	uc007chn.1	109407999	109422175	+	promoter	-13826
C82	Repressed	Enhancers	chr1	109480544	109480764	0	0	0	uc007chr.1	109486647	109502727	+	promoter	-5992
C83	Repressed	Enhancers	chr1	121996201	121996411	0	0	0	intergenic	121996202	121996411	+	OUT	-22000
C84	Constitutive	Enhancers	chr1	122429268	122429612	0	0	0	intergenic	122429269	122429612	+	OUT	-22000
C85	Constitutive	Enhancers	chr1	127338134	127338752	0	0	0	uc007ckf.1	127289482	127332265	-	promoter	-6178
C86	Repressed	Enhancers	chr1	127362936	127363857	0	0	0	intergenic	127362937	127363857	+	OUT	-22000
C87	Repressed	Enhancers	chr1	127369881	127370959	0	0	0	intergenic	127369882	127370959	+	OUT	-22000
C88	Repressed	Enhancers	chr1	129032304	129032493	0	0	0	intergenic	129032305	129032493	+	OUT	-22000
C89	Repressed	Enhancers	chr1	129733330	129733560	0	0	0	intergenic	129733331	129733560	+	OUT	-22000
C90	Induced	Promoters	chr1	130443739	130443956	-	0	0	intergenic	130443740	130443956	+	OUT	-22000
C91	Induced	Enhancers	chr1	130446062	130446282	-	0	0	intergenic	130446063	130446282	+	OUT	-22000
C92	Repressed	Enhancers	chr1	130609371	130609703	0	0	0	intergenic	130609372	130609703	+	OUT	-22000
C93	Repressed	Enhancers	chr1	130621279	130621418	0	0	0	intergenic	130621280	130621418	+	OUT	-22000
C94	Repressed	Enhancers	chr1	130643266	130644269	0	0	0	intergenic	130643267	130644269	+	OUT	-22000
C95	Repressed	Enhancers	chr1	133457315	133457658	0	0	0	intergenic	133457316	133457658	+	OUT	-22000
C96	Induced	Enhancers	chr1	135244324	135244585	-	0	0	uc007cqf.1	135247142	135256900	+	promoter	-2687
C97	Constitutive	Enhancers	chr1	135957244	135957750	0	0	0	intergenic	135957245	135957750	+	OUT	-22000
C98	Repressed	Enhancers	chr1	135991085	135992337	0	1	0	uc007cre.1	135971441	135975732	-	promoter	-15979
C99	Repressed	Promoters	chr1	135995158	135996318	0	0	0	uc007crf.1	136007818	136048013	+	promoter	-12079
C100	Repressed	Promoters	chr1	137595828	137596225	0	0	0	uc007ctn.1	137503023	137584682	-	promoter	-11345
C101	Induced	Promoters	chr1	138466899	138467342	-	0	0	intergenic	138466900	138467342	+	OUT	-22000
C102	Induced	Promoters	chr1	138474402	138475699	-	0	0	intergenic	138474403	138475699	+	OUT	-22000
C103	Induced	Enhancers	chr1	138476842	138478288	-	0	0	intergenic	138476843	138478288	+	OUT	-22000
C104	Induced	Enhancers	chr1	138505559	138505872	-	0	0	uc007cuw.1	138521521	138524856	+	promoter	-15805
C105	Induced	Promoters	chr1	138580986	138582079	-	0	0	uc007cuy.1	138592787	138622305	+	promoter	-11254
C106	Induced	Enhancers	chr1	138583158	138583492	-	0	0	uc007cuy.1	138592787	138622305	+	promoter	-9461
C107	Repressed	Enhancers	chr1	139648110	139648673	0	0	0	intergenic	139648111	139648673	+	OUT	-22000
C108	Induced	Promoters	chr1	139794754	139796117	-	0	0	intergenic	139794755	139796117	+	OUT	-22000
C109	Induced	Promoters	chr1	140140516	140141014	-	0	0	intergenic	140140517	140141014	+	OUT	-22000
C110	Constitutive	Enhancers	chr1	140141081	140141395	0	0	0	intergenic	140141082	140141395	+	OUT	-22000
C111	Induced	Promoters	chr1	140219631	140220143	-	0	0	intergenic	140219632	140220143	+	OUT	-22000
C112	Repressed	Enhancers	chr1	145763728	145765737	0	0	0	intergenic	145763729	145765737	+	OUT	-22000
C113	Repressed	Enhancers	chr1	146047475	146047717	0	0	0	intergenic	146047476	146047717	+	OUT	-22000
C114	Repressed	Enhancers	chr1	146049539	146051406	0	0	0	intergenic	146049540	146051406	+	OUT	-22000
C115	Repressed	Enhancers	chr1	146052449	146053123	0	0	0	intergenic	146052450	146053123	+	OUT	-22000
C116	Repressed	Enhancers	chr1	146189757	146189960	0	0	0	intergenic	146189758	146189960	+	OUT	-22000
C117	Constitutive	Enhancers	chr1	152012156	152012420	0	0	0	intergenic	152012157	152012420	+	OUT	-22000
C118	Induced	Enhancers	chr1	152343913	152344234	-	0	0	intergenic	152343914	152344234	+	OUT	-22000
C119	Repressed	Promoters	chr1	152872361	152872734	0	0	0	intergenic	152872362	152872734	+	OUT	-22000
C120	Repressed	Enhancers	chr1	153092424	153093531	3	0	0	intergenic	153092425	153093531	+	OUT	-22000
C121	Repressed	Promoters	chr1	153097756	153098392	0	0	0	intergenic	153097757	153098392	+	OUT	-22000
C122	Repressed	Enhancers	chr1	153134558	153135054	0	0	0	intergenic	153134559	153135054	+	OUT	-22000
C123	Repressed	Enhancers	chr1	154644426	154645681	0	0	0	uc007czm.1	154654386	154684120	+	promoter	-9332
C124	Repressed	Enhancers	chr1	154646997	154647350	0	0	0	uc007czm.1	154654386	154684120	+	promoter	-7212
C125	Repressed	Enhancers	chr1	156875928	156876256	0	0	0	intergenic	156875929	156876256	+	OUT	-22000
C126	Repressed	Enhancers	chr1	156897240	156898765	0	0	0	intergenic	156897241	156898765	+	OUT	-22000
C127	Repressed	Enhancers	chr1	158916776	158917006	0	0	0	intergenic	158916777	158917006	+	OUT	-22000
C128	Induced	Enhancers	chr1	158944340	158944565	-	0	0	intergenic	158944341	158944565	+	OUT	-22000
C129	Induced	Enhancers	chr1	161971493	161971808	-	0	0	uc007deb.1	161974543	162002913	+	promoter	-2892
C130	Repressed	Enhancers	chr1	164439976	164440186	0	0	0	intergenic	164439977	164440186	+	OUT	-22000
C131	Repressed	Enhancers	chr1	164495055	164495688	0	0	0	uc007dgk.1	164500853	164525401	+	promoter	-5481
C132	Repressed	Enhancers	chr1	167667725	167667950	0	0	0	intergenic	167667726	167667950	+	OUT	-22000
C133	Constitutive	Promoters	chr1	168359774	168360273	0	0	0	uc007dkn.1	168314753	168339937	-	promoter	-20087
C134	Repressed	Enhancers	chr1	168723297	168723685	0	0	0	intergenic	168723298	168723685	+	OUT	-22000
C135	Induced	Enhancers	chr1	172826807	172827046	-	0	0	uc007dml.1	172804318	172815671	-	promoter	-11256
C136	Constitutive	Enhancers	chr1	172927993	172929304	0	0	0	uc007dmw.1	172949069	172959882	+	promoter	-20420
C137	Induced	Promoters	chr1	172936907	172937216	-	0	0	uc007dmw.1	172949069	172959882	+	promoter	-12007
C138	Induced	Enhancers	chr1	172946981	172948518	-	1	0	uc007dmw.1	172949069	172959882	+	promoter	-1319
C139	Induced	Enhancers	chr1	173043758	173044611	-	0	0	uc007dna.1	173051791	173057098	+	promoter	-7606
C140	Repressed	Enhancers	chr1	173429986	173433588	1	1	1	uc007dop.1	173433608	173434881	+	promoter	-1820
C141	Induced	Enhancers	chr1	173546218	173546778	-	0	0	uc007dou.1	173518743	173537491	-	promoter	-9007
C142	Constitutive	Enhancers	chr1	173546904	173550636	0	1	0	uc007dou.1	173518743	173537491	-	promoter	-11279
C143	Constitutive	Enhancers	chr1	173587966	173588822	0	0	0	uc007dox.1	173562533	173583168	-	promoter	-5226
C144	Induced	Enhancers	chr1	173692223	173693226	-	0	0	uc007dpb.1	173697262	173723208	+	promoter	-4537
C145	Repressed	Enhancers	chr1	174353346	174353950	0	0	0	intergenic	174353347	174353950	+	OUT	-22000
C146	Repressed	Enhancers	chr1	174381175	174381757	0	0	0	intergenic	174381176	174381757	+	OUT	-22000
C147	Constitutive	Enhancers	chr1	174385631	174386682	0	0	0	uc007dql.1	174405504	174408706	+	promoter	-19347
C148	Induced	Enhancers	chr1	175968843	175969050	-	0	0	uc007dsn.1	175972082	175973027	+	promoter	-3135
C149	Induced	Enhancers	chr1	175970657	175971426	-	0	0	uc007dsn.1	175972082	175973027	+	promoter	-1040
C150	Induced	Enhancers	chr1	179573831	179574262	-	0	0	uc007duq.1	179571675	179573074	-	promoter	-973
C151	Repressed	Enhancers	chr1	179632127	179633734	0	0	0	intergenic	179632128	179633734	+	OUT	-22000
C152	Repressed	Enhancers	chr1	179641261	179642016	0	0	0	uc007dur.1	179659944	179683436	+	promoter	-18305
C153	Repressed	Enhancers	chr1	179644278	179644761	0	0	0	uc007dur.1	179659944	179683436	+	promoter	-15424
C154	Constitutive	Promoters	chr1	179913071	179913489	0	0	0	uc007duv.1	179921641	179978422	+	promoter	-8360
C155	Repressed	Promoters	chr1	180298778	180299855	0	0	0	intergenic	180298779	180299855	+	OUT	-22000
C156	Induced	Enhancers	chr1	182223085	182224668	-	0	0	intergenic	182223086	182224668	+	OUT	-22000
C157	Constitutive	Enhancers	chr1	182232416	182233914	0	0	0	intergenic	182232417	182233914	+	OUT	-22000
C158	Induced	Enhancers	chr1	182242136	182243555	-	0	0	uc007dwg.1	182260606	182353790	+	promoter	-17760
C159	Induced	Enhancers	chr1	182244759	182245246	-	0	0	uc007dwg.1	182260606	182353790	+	promoter	-15603
C160	Constitutive	Enhancers	chr1	182696653	182697200	0	0	0	intergenic	182696654	182697200	+	OUT	-22000
C161	Constitutive	Promoters	chr1	182698181	182699036	0	0	0	intergenic	182698182	182699036	+	OUT	-22000
C162	Constitutive	Enhancers	chr1	182701692	182702251	0	0	0	intergenic	182701693	182702251	+	OUT	-22000
C163	Constitutive	Promoters	chr1	182707523	182708791	1	0	0	intergenic	182707524	182708791	+	OUT	-22000
C164	Constitutive	Enhancers	chr1	182759789	182760373	0	0	0	uc007dwr.1	182732698	182743734	-	promoter	-16347
C165	Repressed	Enhancers	chr1	182765206	182765755	0	0	0	uc007dwt.1	182781281	182798245	+	promoter	-15800
C166	Repressed	Promoters	chr1	182777995	182779743	0	0	0	uc007dwt.1	182781281	182798245	+	promoter	-2411
C167	Repressed	Enhancers	chr1	182818695	182819091	0	0	0	uc007dwu.1	182823249	182829233	+	promoter	-4355
C168	Repressed	Enhancers	chr1	182852400	182852639	0	0	0	uc007dww.1	182865169	182868532	+	promoter	-12649
C169	Repressed	Enhancers	chr1	183160749	183164937	3	1	0	uc007dxf.1	183107823	183141501	-	promoter	-21342
C170	Constitutive	Enhancers	chr1	183175982	183178137	0	0	0	intergenic	183175983	183178137	+	OUT	-22000
C171	Repressed	Promoters	chr1	183186315	183188245	0	0	0	intergenic	183186316	183188245	+	OUT	-22000
C172	Repressed	Enhancers	chr1	183483247	183483518	0	0	0	intergenic	183483248	183483518	+	OUT	-22000
C173	Constitutive	Enhancers	chr1	183790555	183791090	0	0	0	uc007dxo.1	183745466	183772463	-	promoter	-18360
C174	Repressed	Enhancers	chr1	184038494	184039005	0	0	0	uc007dxu.1	184054880	184062519	+	promoter	-16130
C175	Constitutive	Enhancers	chr1	184450224	184450689	0	0	0	uc007dye.1	184397390	184447655	-	promoter	-2802
C176	Constitutive	Enhancers	chr1	184457281	184457781	0	0	0	uc007dye.1	184397390	184447655	-	promoter	-9876
C177	Repressed	Enhancers	chr1	184457843	184458995	0	0	0	uc007dye.1	184397390	184447655	-	promoter	-10764
C178	Repressed	Enhancers	chr1	184838452	184838767	1	0	0	intergenic	184838453	184838767	+	OUT	-22000
C179	Repressed	Promoters	chr1	184858125	184858922	0	0	0	intergenic	184858126	184858922	+	OUT	-22000
C180	Repressed	Enhancers	chr1	185803685	185804034	0	0	0	intergenic	185803686	185804034	+	OUT	-22000
C181	Repressed	Enhancers	chr1	186181723	186182202	0	0	0	intergenic	186181724	186182202	+	OUT	-22000
C182	Repressed	Enhancers	chr1	186264039	186266301	0	0	0	intergenic	186264040	186266301	+	OUT	-22000
C183	Repressed	Enhancers	chr1	186358700	186360302	0	0	0	intergenic	186358701	186360302	+	OUT	-22000
C184	Repressed	Enhancers	chr1	186438770	186440307	0	0	0	intergenic	186438771	186440307	+	OUT	-22000
C185	Repressed	Enhancers	chr1	186441664	186442161	0	0	0	intergenic	186441665	186442161	+	OUT	-22000
C186	Constitutive	Enhancers	chr1	186675585	186676356	0	0	0	uc007dyq.1	186636946	186669726	-	promoter	-6245
C187	Induced	Promoters	chr1	192919381	192919588	-	0	0	uc007ecc.1	192921758	192932822	+	promoter	-2273
C188	Induced	Enhancers	chr1	192948219	192950049	-	0	0	intergenic	192948220	192950049	+	OUT	-22000
C189	Induced	Enhancers	chr1	193013907	193014207	-	1	0	uc007ece.1	192994175	193007212	-	promoter	-6845
C190	Induced	Enhancers	chr1	193017767	193018912	-	0	0	uc007ece.1	192994175	193007212	-	promoter	-11128
C191	Repressed	Enhancers	chr1	193021849	193023253	0	0	0	uc007ece.1	192994175	193007212	-	promoter	-15339
C192	Repressed	Enhancers	chr1	193024425	193025505	0	0	0	uc007ece.1	192994175	193007212	-	promoter	-17753
C193	Repressed	Enhancers	chr1	193073922	193074942	0	0	0	intergenic	193073923	193074942	+	OUT	-22000
C194	Repressed	Enhancers	chr1	193077520	193078711	0	0	0	intergenic	193077521	193078711	+	OUT	-22000
C195	Repressed	Enhancers	chr1	193082708	193083049	0	0	0	intergenic	193082709	193083049	+	OUT	-22000
C196	Repressed	Enhancers	chr1	193092202	193095502	4	0	0	intergenic	193092203	193095502	+	OUT	-22000
C197	Repressed	Enhancers	chr1	193105228	193105569	1	0	0	intergenic	193105229	193105569	+	OUT	-22000
C198	Constitutive	Enhancers	chr1	193245429	193246266	0	0	0	intergenic	193245430	193246266	+	OUT	-22000
C199	Induced	Enhancers	chr1	193262227	193263932	-	0	0	intergenic	193262228	193263932	+	OUT	-22000
C200	Induced	Promoters	chr1	193266363	193266857	-	0	0	intergenic	193266364	193266857	+	OUT	-22000
C201	Induced	Enhancers	chr1	193268868	193270082	-	0	0	intergenic	193268869	193270082	+	OUT	-22000
C202	Induced	Enhancers	chr1	193271418	193271760	-	0	0	intergenic	193271419	193271760	+	OUT	-22000
C203	Induced	Promoters	chr1	193673192	193673680	-	0	0	intergenic	193673193	193673680	+	OUT	-22000
C204	Induced	Enhancers	chr1	193701955	193702258	-	0	0	intergenic	193701956	193702258	+	OUT	-22000
C205	Constitutive	Enhancers	chr1	193778897	193780985	1	0	0	intergenic	193778898	193780985	+	OUT	-22000
C206	Induced	Promoters	chr1	196802210	196804091	-	0	0	intergenic	196802211	196804091	+	OUT	-22000
C207	Constitutive	Enhancers	chr1	196821196	196821952	1	0	0	intergenic	196821197	196821952	+	OUT	-22000
C208	Constitutive	Promoters	chr10	7608186	7608480	0	0	0	intergenic	7608187	7608480	+	OUT	-22000
C209	Repressed	Enhancers	chr10	7785741	7785950	0	0	0	intergenic	7785742	7785950	+	OUT	-22000
C210	Induced	Enhancers	chr10	8635349	8635945	-	0	0	intergenic	8635350	8635945	+	OUT	-22000
C211	Repressed	Enhancers	chr10	8645125	8645500	0	0	0	intergenic	8645126	8645500	+	OUT	-22000
C212	Repressed	Enhancers	chr10	8664909	8665223	0	0	0	intergenic	8664910	8665223	+	OUT	-22000
C213	Induced	Enhancers	chr10	9627845	9628248	-	0	0	uc007ejb.1	9475344	9620481	-	promoter	-7566
C214	Repressed	Enhancers	chr10	10041175	10041559	0	0	0	intergenic	10041176	10041559	+	OUT	-22000
C215	Induced	Promoters	chr10	12594424	12595105	-	0	0	uc007eke.1	12440616	12589163	-	promoter	-5602
C216	Induced	Enhancers	chr10	13893952	13894124	-	0	0	intergenic	13893953	13894124	+	OUT	-22000
C217	Induced	Enhancers	chr10	13895300	13895509	-	0	0	intergenic	13895301	13895509	+	OUT	-22000
C218	Constitutive	Enhancers	chr10	13906217	13906756	0	0	0	intergenic	13906218	13906756	+	OUT	-22000
C219	Induced	Enhancers	chr10	13908754	13909196	-	0	0	intergenic	13908755	13909196	+	OUT	-22000
C220	Constitutive	Promoters	chr10	14264906	14265488	1	0	0	uc007elk.1	14122390	14264842	-	promoter	-355
C221	Induced	Promoters	chr10	14982154	14982309	-	0	0	intergenic	14982155	14982309	+	OUT	-22000
C222	Induced	Enhancers	chr10	16921098	16921518	-	0	0	intergenic	16921099	16921518	+	OUT	-22000
C223	Induced	Enhancers	chr10	17238255	17238470	-	0	0	intergenic	17238256	17238470	+	OUT	-22000
C224	Repressed	Enhancers	chr10	17492133	17492586	0	0	0	intergenic	17492134	17492586	+	OUT	-22000
C225	Induced	Promoters	chr10	17709083	17709357	-	0	0	intergenic	17709084	17709357	+	OUT	-22000
C226	Induced	Promoters	chr10	18038234	18038615	-	0	0	intergenic	18038235	18038615	+	OUT	-22000
C227	Induced	Promoters	chr10	18677655	18677830	-	0	0	intergenic	18677656	18677830	+	OUT	-22000
C228	Induced	Enhancers	chr10	18679705	18680020	-	0	0	intergenic	18679706	18680020	+	OUT	-22000
C229	Constitutive	Promoters	chr10	18763522	18764135	0	0	0	intergenic	18763523	18764135	+	OUT	-22000
C230	Induced	Promoters	chr10	18782233	18783367	-	0	0	intergenic	18782234	18783367	+	OUT	-22000
C231	Induced	Enhancers	chr10	18788283	18788741	-	0	0	intergenic	18788284	18788741	+	OUT	-22000
C232	Repressed	Enhancers	chr10	19241936	19242288	0	0	0	intergenic	19241937	19242288	+	OUT	-22000
C233	Repressed	Enhancers	chr10	19411708	19411917	0	0	0	intergenic	19411709	19411917	+	OUT	-22000
C234	Induced	Enhancers	chr10	20489513	20489678	-	0	0	intergenic	20489514	20489678	+	OUT	-22000
C235	Induced	Enhancers	chr10	20492020	20492344	-	0	0	intergenic	20492021	20492344	+	OUT	-22000
C236	Repressed	Enhancers	chr10	21285545	21285768	0	0	0	intergenic	21285546	21285768	+	OUT	-22000
C237	Induced	Enhancers	chr10	21496862	21497076	-	0	0	intergenic	21496863	21497076	+	OUT	-22000
C238	Induced	Enhancers	chr10	21547113	21547606	-	0	0	intergenic	21547114	21547606	+	OUT	-22000
C239	Induced	Enhancers	chr10	21559074	21559902	-	0	0	intergenic	21559075	21559902	+	OUT	-22000
C240	Induced	Promoters	chr10	21778558	21778816	-	0	0	uc007epa.1	21774046	21774076	-	promoter	-4611
C241	Repressed	Enhancers	chr10	22467030	22467195	0	0	0	uc007epq.1	22423684	22451739	-	promoter	-15374
C242	Constitutive	Promoters	chr10	22796817	22797169	0	0	0	intergenic	22796818	22797169	+	OUT	-22000
C243	Repressed	Enhancers	chr10	24649903	24650347	0	0	0	uc007erg.1	24635028	24647244	-	promoter	-2881
C244	Induced	Promoters	chr10	24847608	24847893	-	0	0	intergenic	24847609	24847893	+	OUT	-22000
C245	Repressed	Promoters	chr10	25051728	25052057	0	0	0	intergenic	25051729	25052057	+	OUT	-22000
C246	Induced	Enhancers	chr10	36832105	36832778	-	0	0	intergenic	36832106	36832778	+	OUT	-22000
C247	Induced	Enhancers	chr10	36909709	36910090	-	0	0	intergenic	36909710	36910090	+	OUT	-22000
C248	Induced	Enhancers	chr10	36914071	36914280	-	0	0	intergenic	36914072	36914280	+	OUT	-22000
C249	Constitutive	Enhancers	chr10	36951764	36952415	0	0	0	intergenic	36951765	36952415	+	OUT	-22000
C250	Induced	Enhancers	chr10	36954920	36955355	-	0	0	intergenic	36954921	36955355	+	OUT	-22000
C251	Induced	Enhancers	chr10	37040191	37041344	-	0	0	intergenic	37040192	37041344	+	OUT	-22000
C252	Constitutive	Enhancers	chr10	37056899	37057353	0	0	0	intergenic	37056900	37057353	+	OUT	-22000
C253	Repressed	Promoters	chr10	38891004	38891389	0	0	0	intergenic	38891005	38891389	+	OUT	-22000
C254	Constitutive	Enhancers	chr10	38986732	38987126	0	0	0	intergenic	38986733	38987126	+	OUT	-22000
C255	Constitutive	Promoters	chr10	39884705	39885086	0	0	0	intergenic	39884706	39885086	+	OUT	-22000
C256	Repressed	Enhancers	chr10	39995834	39996178	0	0	0	uc007ewr.1	39969008	39977471	-	promoter	-18535
C257	Induced	Enhancers	chr10	40245624	40245984	-	0	0	intergenic	40245625	40245984	+	OUT	-22000
C258	Repressed	Enhancers	chr10	41105558	41106002	0	0	0	intergenic	41105559	41106002	+	OUT	-22000
C259	Repressed	Enhancers	chr10	43387098	43388043	0	0	0	intergenic	43387099	43388043	+	OUT	-22000
C260	Repressed	Enhancers	chr10	43422872	43423092	0	0	0	intergenic	43422873	43423092	+	OUT	-22000
C261	Constitutive	Enhancers	chr10	43731182	43731437	0	0	0	uc007ezr.1	43718358	43724175	-	promoter	-7135
C262	Repressed	Enhancers	chr10	43788870	43789273	0	0	0	intergenic	43788871	43789273	+	OUT	-22000
C263	Induced	Promoters	chr10	44318636	44319430	-	0	0	intergenic	44318637	44319430	+	OUT	-22000
C264	Induced	Enhancers	chr10	44321387	44322121	-	0	0	intergenic	44321388	44322121	+	OUT	-22000
C265	Constitutive	Enhancers	chr10	44350309	44351108	0	0	0	intergenic	44350310	44351108	+	OUT	-22000
C266	Induced	Enhancers	chr10	44405954	44406191	-	0	0	intergenic	44405955	44406191	+	OUT	-22000
C267	Constitutive	Enhancers	chr10	44411341	44411853	0	0	0	intergenic	44411342	44411853	+	OUT	-22000
C268	Constitutive	Enhancers	chr10	44996674	44997129	0	0	0	uc007ezy.1	45009110	45038256	+	promoter	-12208
C269	Constitutive	Enhancers	chr10	51141840	51142209	0	0	0	intergenic	51141841	51142209	+	OUT	-22000
C270	Constitutive	Promoters	chr10	51168765	51172660	2	0	0	intergenic	51168766	51172660	+	OUT	-22000
C271	Repressed	Promoters	chr10	51172714	51176689	1	0	0	intergenic	51172715	51176689	+	OUT	-22000
C272	Induced	Promoters	chr10	51245901	51249941	-	0	0	intergenic	51245902	51249941	+	OUT	-22000
C273	Induced	Enhancers	chr10	51250664	51251054	-	0	0	intergenic	51250665	51251054	+	OUT	-22000
C274	Induced	Promoters	chr10	51251802	51252254	-	0	0	intergenic	51251803	51252254	+	OUT	-22000
C275	Repressed	Enhancers	chr10	53837504	53839549	0	0	0	intergenic	53837505	53839549	+	OUT	-22000
C276	Induced	Enhancers	chr10	56513101	56513387	-	0	0	intergenic	56513102	56513387	+	OUT	-22000
C277	Repressed	Enhancers	chr10	56599734	56599935	0	0	0	intergenic	56599735	56599935	+	OUT	-22000
C278	Induced	Promoters	chr10	59099364	59100191	-	0	0	uc007fdt.1	58917693	59079440	-	promoter	-20338
C279	Repressed	Enhancers	chr10	59395478	59395675	0	0	0	intergenic	59395479	59395675	+	OUT	-22000
C280	Repressed	Enhancers	chr10	59671278	59673538	2	0	1	uc007fem.1	59644281	59651455	-	promoter	-20953
C281	Repressed	Promoters	chr10	59680334	59681132	2	0	0	intergenic	59680335	59681132	+	OUT	-22000
C282	Repressed	Enhancers	chr10	59715051	59715755	0	0	0	intergenic	59715052	59715755	+	OUT	-22000
C283	Repressed	Enhancers	chr10	59722592	59725580	0	0	0	uc007fen.1	59740485	59765348	+	promoter	-16398
C284	Repressed	Enhancers	chr10	59730934	59732890	0	0	0	uc007fen.1	59740485	59765348	+	promoter	-8572
C285	Repressed	Enhancers	chr10	59735820	59736936	0	1	0	uc007fen.1	59740485	59765348	+	promoter	-4106
C286	Constitutive	Enhancers	chr10	59737144	59737991	0	0	0	uc007fen.1	59740485	59765348	+	promoter	-2917
C287	Repressed	Enhancers	chr10	60420708	60421184	0	0	0	uc007ffg.1	60390973	60400880	-	promoter	-20066
C288	Repressed	Enhancers	chr10	60630083	60630712	0	0	0	uc007ffm.1	60634733	60643428	+	promoter	-4335
C289	Induced	Enhancers	chr10	61528898	61529324	-	0	0	uc007fgr.1	61533769	61535319	+	promoter	-4657
C290	Induced	Promoters	chr10	62845077	62845622	-	0	0	uc007fkg.1	62849364	62871569	+	promoter	-4014
C291	Repressed	Enhancers	chr10	66310950	66312722	0	0	0	intergenic	66310951	66312722	+	OUT	-22000
C292	Repressed	Enhancers	chr10	66314327	66316897	0	0	0	intergenic	66314328	66316897	+	OUT	-22000
C293	Repressed	Enhancers	chr10	66328646	66329056	1	0	0	intergenic	66328647	66329056	+	OUT	-22000
C294	Repressed	Enhancers	chr10	66382207	66384494	0	0	0	intergenic	66382208	66384494	+	OUT	-22000
C295	Repressed	Enhancers	chr10	66391028	66395015	0	0	0	intergenic	66391029	66395015	+	OUT	-22000
C296	Repressed	Enhancers	chr10	66399706	66401536	0	0	0	intergenic	66399707	66401536	+	OUT	-22000
C297	Repressed	Enhancers	chr10	66403264	66403603	0	0	0	intergenic	66403265	66403603	+	OUT	-22000
C298	Constitutive	Promoters	chr10	67109928	67111167	1	0	0	intergenic	67109929	67111167	+	OUT	-22000
C299	Induced	Promoters	chr10	67745519	67746174	-	0	0	uc007fmh.1	67558340	67741474	-	promoter	-4373
C300	Constitutive	Promoters	chr10	70702369	70702689	0	0	0	uc007fon.1	70688224	70701021	-	promoter	-1508
C301	Induced	Promoters	chr10	70754008	70754198	-	0	0	uc007foo.1	70717727	70747981	-	promoter	-6122
C302	Repressed	Enhancers	chr10	76631640	76631882	0	0	0	uc007fvh.1	76514923	76629246	-	promoter	-2515
C303	Repressed	Enhancers	chr10	76669637	76669932	0	0	0	intergenic	76669638	76669932	+	OUT	-22000
C304	Repressed	Enhancers	chr10	76673348	76674380	0	0	0	intergenic	76673349	76674380	+	OUT	-22000
C305	Constitutive	Enhancers	chr10	76985867	76986615	0	0	1	uc007fvv.1	76993092	77028419	+	promoter	-6850
C306	Induced	Enhancers	chr10	77568345	77569455	-	0	0	intergenic	77568346	77569455	+	OUT	-22000
C307	Induced	Promoters	chr10	77571008	77571193	-	0	0	intergenic	77571009	77571193	+	OUT	-22000
C308	Induced	Enhancers	chr10	77592891	77593988	-	0	0	intergenic	77592892	77593988	+	OUT	-22000
C309	Induced	Enhancers	chr10	77598258	77600933	-	0	0	intergenic	77598259	77600933	+	OUT	-22000
C310	Induced	Enhancers	chr10	77606492	77607111	-	0	0	intergenic	77606493	77607111	+	OUT	-22000
C311	Repressed	Enhancers	chr10	77933550	77934020	0	0	0	uc007fxu.2	77899491	77927693	-	promoter	-6092
C312	Repressed	Enhancers	chr10	77939426	77939879	0	0	0	uc007fxu.2	77899491	77927693	-	promoter	-11960
C313	Repressed	Promoters	chr10	77943705	77945224	0	0	0	uc007fxu.2	77899491	77927693	-	promoter	-16772
C314	Constitutive	Promoters	chr10	79303535	79304549	0	0	0	uc007gab.1	79317349	79327178	+	promoter	-13306
C315	Constitutive	Enhancers	chr10	79312675	79313106	0	0	0	uc007gab.1	79317349	79327178	+	promoter	-4458
C316	Repressed	Promoters	chr10	80214323	80214743	0	0	0	uc007gel.1	80217950	80257092	+	promoter	-3416
C317	Constitutive	Promoters	chr10	80384480	80385298	0	0	0	uc007gfk.1	80364107	80380990	-	promoter	-3899
C318	Constitutive	Promoters	chr10	80635945	80636284	0	0	0	uc007gge.1	80639403	80645241	+	promoter	-3288
C319	Constitutive	Promoters	chr10	81545908	81546234	0	0	0	intergenic	81545909	81546234	+	OUT	-22000
C320	Repressed	Enhancers	chr10	82243059	82243249	0	0	0	uc007gjv.1	82211444	82226886	-	promoter	-16268
C321	Repressed	Enhancers	chr10	82385972	82387090	0	0	0	intergenic	82385973	82387090	+	OUT	-22000
C322	Repressed	Enhancers	chr10	82806011	82807135	0	0	0	uc007gkf.1	82693883	82800562	-	promoter	-6011
C323	Repressed	Enhancers	chr10	83523529	83523788	0	0	0	intergenic	83523530	83523788	+	OUT	-22000
C324	Repressed	Enhancers	chr10	83797593	83798128	0	0	0	intergenic	83797594	83798128	+	OUT	-22000
C325	Repressed	Enhancers	chr10	83801445	83801735	0	0	0	intergenic	83801446	83801735	+	OUT	-22000
C326	Repressed	Promoters	chr10	84011891	84012175	0	0	0	uc007gkq.1	83989049	83996633	-	promoter	-15400
C327	Repressed	Enhancers	chr10	84012737	84012969	0	0	0	uc007gkq.1	83989049	83996633	-	promoter	-16220
C328	Induced	Enhancers	chr10	87216540	87216696	-	0	0	intergenic	87216541	87216696	+	OUT	-22000
C329	Repressed	Enhancers	chr10	87268536	87268809	0	0	0	intergenic	87268537	87268809	+	OUT	-22000
C330	Repressed	Enhancers	chr10	87293334	87295272	0	0	0	uc007gqu.1	87289123	87291107	-	promoter	-3196
C331	Repressed	Enhancers	chr10	87304825	87305056	0	0	0	uc007gqu.1	87289123	87291107	-	promoter	-13834
C332	Induced	Enhancers	chr10	87835819	87836117	-	0	0	uc007grk.1	87841876	87896833	+	promoter	-5907
C333	Constitutive	Promoters	chr10	90644060	90645740	1	0	2	uc007gtq.1	90610315	90634327	-	promoter	-10573
C334	Induced	Enhancers	chr10	90657877	90658291	-	0	0	intergenic	90657878	90658291	+	OUT	-22000
C335	Induced	Enhancers	chr10	90668174	90669443	-	0	0	intergenic	90668175	90669443	+	OUT	-22000
C336	Induced	Enhancers	chr10	90704440	90706525	-	1	0	intergenic	90704441	90706525	+	OUT	-22000
C337	Repressed	Enhancers	chr10	92558720	92558933	0	0	0	uc007gui.1	92507833	92544363	-	promoter	-14464
C338	Repressed	Enhancers	chr10	92586971	92587242	0	0	0	intergenic	92586972	92587242	+	OUT	-22000
C339	Repressed	Enhancers	chr10	92827549	92827875	0	0	0	intergenic	92827550	92827875	+	OUT	-22000
C340	Repressed	Enhancers	chr10	92833265	92833645	0	0	0	intergenic	92833266	92833645	+	OUT	-22000
C341	Constitutive	Enhancers	chr10	92837758	92838941	0	0	0	intergenic	92837759	92838941	+	OUT	-22000
C342	Repressed	Enhancers	chr10	92893595	92893958	0	0	0	intergenic	92893596	92893958	+	OUT	-22000
C343	Repressed	Enhancers	chr10	92895273	92895646	0	0	0	intergenic	92895274	92895646	+	OUT	-22000
C344	Repressed	Enhancers	chr10	94101470	94102469	0	0	0	intergenic	94101471	94102469	+	OUT	-22000
C345	Repressed	Enhancers	chr10	94971419	94971738	0	0	0	uc007gwm.1	94977795	95008292	+	promoter	-6216
C346	Repressed	Promoters	chr10	95140364	95140786	0	0	0	intergenic	95140365	95140786	+	OUT	-22000
C347	Repressed	Enhancers	chr10	95636352	95636558	0	0	0	intergenic	95636353	95636558	+	OUT	-22000
C348	Repressed	Enhancers	chr10	95643397	95644581	0	0	0	intergenic	95643398	95644581	+	OUT	-22000
C349	Induced	Enhancers	chr10	95724922	95726766	-	0	0	intergenic	95724923	95726766	+	OUT	-22000
C350	Repressed	Enhancers	chr10	95736274	95736772	0	0	0	intergenic	95736275	95736772	+	OUT	-22000
C351	Induced	Enhancers	chr10	95742540	95742762	-	0	0	intergenic	95742541	95742762	+	OUT	-22000
C352	Induced	Enhancers	chr10	95757342	95757734	-	0	0	intergenic	95757343	95757734	+	OUT	-22000
C353	Repressed	Enhancers	chr10	95795162	95796157	0	0	0	intergenic	95795163	95796157	+	OUT	-22000
C354	Repressed	Enhancers	chr10	95800432	95800930	0	0	0	intergenic	95800433	95800930	+	OUT	-22000
C355	Induced	Enhancers	chr10	95836246	95837236	-	0	0	intergenic	95836247	95837236	+	OUT	-22000
C356	Constitutive	Enhancers	chr10	95840052	95840605	0	0	0	intergenic	95840053	95840605	+	OUT	-22000
C357	Induced	Enhancers	chr10	95898020	95898255	-	0	0	intergenic	95898021	95898255	+	OUT	-22000
C358	Repressed	Enhancers	chr10	96338857	96339188	0	0	0	intergenic	96338858	96339188	+	OUT	-22000
C359	Induced	Promoters	chr10	96852555	96852769	-	0	0	intergenic	96852556	96852769	+	OUT	-22000
C360	Repressed	Enhancers	chr10	98237477	98237704	0	0	0	intergenic	98237478	98237704	+	OUT	-22000
C361	Repressed	Enhancers	chr10	98239319	98239997	0	0	0	intergenic	98239320	98239997	+	OUT	-22000
C362	Repressed	Enhancers	chr10	98244411	98244987	0	0	0	intergenic	98244412	98244987	+	OUT	-22000
C363	Repressed	Enhancers	chr10	98342545	98344451	0	0	0	intergenic	98342546	98344451	+	OUT	-22000
C364	Constitutive	Enhancers	chr10	98544184	98544843	0	0	0	intergenic	98544185	98544843	+	OUT	-22000
C365	Repressed	Promoters	chr10	98703227	98703447	0	0	0	intergenic	98703228	98703447	+	OUT	-22000
C366	Repressed	Enhancers	chr10	98704080	98704857	0	0	0	intergenic	98704081	98704857	+	OUT	-22000
C367	Constitutive	Enhancers	chr10	98922340	98924704	0	0	0	intergenic	98922341	98924704	+	OUT	-22000
C368	Constitutive	Promoters	chr10	98929214	98930961	0	0	0	intergenic	98929215	98930961	+	OUT	-22000
C369	Repressed	Promoters	chr10	99622855	99623167	0	0	0	intergenic	99622856	99623167	+	OUT	-22000
C370	Induced	Promoters	chr10	110539083	110539981	-	0	0	intergenic	110539084	110539981	+	OUT	-22000
C371	Repressed	Enhancers	chr10	110555501	110557530	0	0	0	intergenic	110555502	110557530	+	OUT	-22000
C372	Repressed	Enhancers	chr10	110563707	110564996	0	1	0	intergenic	110563708	110564996	+	OUT	-22000
C373	Constitutive	Enhancers	chr10	110565332	110565982	0	0	0	intergenic	110565333	110565982	+	OUT	-22000
C374	Repressed	Enhancers	chr10	110568015	110571843	0	0	0	intergenic	110568016	110571843	+	OUT	-22000
C375	Constitutive	Enhancers	chr10	110596488	110596782	0	0	0	uc007gzx.1	110601857	110701948	+	promoter	-5221
C376	Constitutive	Promoters	chr10	110599906	110600556	0	0	0	uc007gzx.1	110601857	110701948	+	promoter	-1625
C377	Repressed	Enhancers	chr10	110830752	110831036	0	0	0	intergenic	110830753	110831036	+	OUT	-22000
C378	Repressed	Enhancers	chr10	110976884	110977303	0	0	0	intergenic	110976885	110977303	+	OUT	-22000
C379	Repressed	Enhancers	chr10	110980958	110981199	0	0	0	intergenic	110980959	110981199	+	OUT	-22000
C380	Repressed	Enhancers	chr10	111439056	111439657	1	0	0	uc007haj.1	111422512	111434251	-	promoter	-5106
C381	Constitutive	Enhancers	chr10	114765542	114766056	0	0	0	uc007haz.1	114726917	114752647	-	promoter	-13152
C382	Repressed	Enhancers	chr10	116735386	116735673	0	0	0	uc007hdc.1	116724852	116729924	-	promoter	-5606
C383	Repressed	Enhancers	chr10	116737641	116738280	0	0	0	uc007hdc.1	116724852	116729924	-	promoter	-8037
C384	Repressed	Enhancers	chr10	116739523	116742564	0	0	0	uc007hdc.1	116724852	116729924	-	promoter	-11120
C385	Repressed	Promoters	chr10	116854241	116856119	0	0	0	intergenic	116854242	116856119	+	OUT	-22000
C386	Repressed	Enhancers	chr10	116872028	116872662	0	0	0	intergenic	116872029	116872662	+	OUT	-22000
C387	Induced	Enhancers	chr10	117156164	117156701	-	0	0	uc007hdm.1	117125960	117147772	-	promoter	-8661
C388	Constitutive	Promoters	chr10	117158485	117159266	0	0	0	uc007hdm.1	117125960	117147772	-	promoter	-11104
C389	Repressed	Enhancers	chr10	117297693	117298410	0	0	0	uc007hdr.1	117251652	117283030	-	promoter	-15022
C390	Induced	Enhancers	chr10	117309650	117309903	-	0	0	intergenic	117309651	117309903	+	OUT	-22000
C391	Repressed	Enhancers	chr10	117336527	117336856	0	0	0	intergenic	117336528	117336856	+	OUT	-22000
C392	Induced	Promoters	chr10	117342695	117343059	-	0	0	intergenic	117342696	117343059	+	OUT	-22000
C393	Induced	Enhancers	chr10	117346744	117347931	-	0	0	intergenic	117346745	117347931	+	OUT	-22000
C394	Repressed	Promoters	chr10	117377874	117378354	0	0	0	intergenic	117377875	117378354	+	OUT	-22000
C395	Repressed	Enhancers	chr10	117449283	117449484	0	0	0	intergenic	117449284	117449484	+	OUT	-22000
C396	Repressed	Enhancers	chr10	117486431	117490142	0	0	0	intergenic	117486432	117490142	+	OUT	-22000
C397	Repressed	Enhancers	chr10	117520345	117523611	0	0	0	intergenic	117520346	117523611	+	OUT	-22000
C398	Repressed	Enhancers	chr10	117532097	117541311	0	1	0	intergenic	117532098	117541311	+	OUT	-22000
C399	Repressed	Enhancers	chr10	117558141	117558308	0	0	0	intergenic	117558142	117558308	+	OUT	-22000
C400	Repressed	Enhancers	chr10	120051267	120051490	0	0	0	intergenic	120051268	120051490	+	OUT	-22000
C401	Repressed	Enhancers	chr10	120052992	120055635	0	0	0	intergenic	120052993	120055635	+	OUT	-22000
C402	Repressed	Enhancers	chr10	120060418	120065489	2	0	0	intergenic	120060419	120065489	+	OUT	-22000
C403	Repressed	Enhancers	chr10	120072887	120073588	1	0	0	intergenic	120072888	120073588	+	OUT	-22000
C404	Repressed	Promoters	chr10	120101923	120102154	0	0	0	intergenic	120101924	120102154	+	OUT	-22000
C405	Repressed	Enhancers	chr10	120102662	120103150	0	0	0	intergenic	120102663	120103150	+	OUT	-22000
C406	Induced	Promoters	chr10	120182197	120182391	-	0	0	intergenic	120182198	120182391	+	OUT	-22000
C407	Repressed	Enhancers	chr10	120933673	120935534	0	0	0	intergenic	120933674	120935534	+	OUT	-22000
C408	Induced	Promoters	chr10	120970309	120970521	-	0	0	intergenic	120970310	120970521	+	OUT	-22000
C409	Induced	Promoters	chr10	122419950	122421897	-	0	0	intergenic	122419951	122421897	+	OUT	-22000
C410	Repressed	Enhancers	chr10	122522317	122522612	0	0	0	uc007hgk.1	122432404	122513081	-	promoter	-9384
C411	Repressed	Promoters	chr10	124807082	124807659	0	0	0	intergenic	124807083	124807659	+	OUT	-22000
C412	Repressed	Promoters	chr10	124825413	124826986	2	0	0	intergenic	124825414	124826986	+	OUT	-22000
C413	Constitutive	Promoters	chr10	126342504	126343214	0	0	0	uc007hhf.1	126305485	126338411	-	promoter	-4448
C414	Induced	Promoters	chr10	126365193	126366241	-	0	0	intergenic	126365194	126366241	+	OUT	-22000
C415	Repressed	Enhancers	chr10	127068192	127072588	2	1	0	uc007hka.1	127080041	127098043	+	promoter	-9650
C416	Constitutive	Enhancers	chr10	127072733	127073356	0	0	0	uc007hka.1	127080041	127098043	+	promoter	-6996
C417	Repressed	Enhancers	chr10	127073834	127074363	0	0	0	uc007hka.1	127080041	127098043	+	promoter	-5942
C418	Induced	Enhancers	chr10	129748579	129748889	-	0	0	uc007hrj.2	129759932	129799695	+	promoter	-11197
C419	Constitutive	Promoters	chr10	129978883	129979758	0	0	0	intergenic	129978884	129979758	+	OUT	-22000
C420	Constitutive	Promoters	chr11	3000387	3000559	0	0	0	intergenic	3000388	3000559	+	OUT	-22000
C421	Repressed	Promoters	chr11	3005030	3005535	0	0	0	uc007hro.1	3024023	3028893	+	promoter	-18740
C422	Constitutive	Enhancers	chr11	4132884	4133780	0	0	0	uc007hus.1	4136422	4141029	+	promoter	-3089
C423	Induced	Promoters	chr11	4342306	4342558	-	0	0	uc007huv.1	4246385	4341085	-	promoter	-1347
C424	Constitutive	Promoters	chr11	5385616	5386133	0	0	0	intergenic	5385617	5386133	+	OUT	-22000
C425	Induced	Promoters	chr11	5405712	5406254	-	0	0	uc007hwm.1	5420969	5425875	+	promoter	-14985
C426	Constitutive	Enhancers	chr11	5411959	5412861	0	0	0	uc007hwm.1	5420969	5425875	+	promoter	-8558
C427	Induced	Enhancers	chr11	8585382	8585539	-	0	0	intergenic	8585383	8585539	+	OUT	-22000
C428	Induced	Enhancers	chr11	8589063	8589805	-	0	0	intergenic	8589064	8589805	+	OUT	-22000
C429	Constitutive	Enhancers	chr11	8600821	8602109	0	0	0	intergenic	8600822	8602109	+	OUT	-22000
C430	Repressed	Enhancers	chr11	8659864	8660072	0	0	0	intergenic	8659865	8660072	+	OUT	-22000
C431	Induced	Enhancers	chr11	11446816	11447992	-	0	0	uc007iag.1	11457423	11479463	+	promoter	-10018
C432	Induced	Enhancers	chr11	11453539	11454529	-	0	0	uc007iag.1	11457423	11479463	+	promoter	-3388
C433	Induced	Enhancers	chr11	11567274	11569543	-	0	0	uc007iaj.1	11586215	11661427	+	promoter	-17806
C434	Induced	Enhancers	chr11	11572955	11573459	-	0	0	uc007iaj.1	11586215	11661427	+	promoter	-13007
C435	Induced	Promoters	chr11	11577428	11577627	-	0	0	uc007iaj.1	11586215	11661427	+	promoter	-8687
C436	Induced	Promoters	chr11	11582998	11583447	-	0	0	uc007iaj.1	11586215	11661427	+	promoter	-2992
C437	Repressed	Enhancers	chr11	16570257	16570564	0	0	0	intergenic	16570258	16570564	+	OUT	-22000
C438	Constitutive	Promoters	chr11	19819313	19820807	0	0	0	uc007icq.1	19824444	19919089	+	promoter	-4383
C439	Constitutive	Enhancers	chr11	20068787	20069349	0	0	0	intergenic	20068788	20069349	+	OUT	-22000
C440	Induced	Promoters	chr11	20345382	20345889	-	0	0	intergenic	20345383	20345889	+	OUT	-22000
C441	Induced	Promoters	chr11	20355092	20356125	-	0	0	intergenic	20355093	20356125	+	OUT	-22000
C442	Constitutive	Enhancers	chr11	20368442	20369074	0	0	0	intergenic	20368443	20369074	+	OUT	-22000
C443	Constitutive	Enhancers	chr11	20377210	20378107	0	0	0	intergenic	20377211	20378107	+	OUT	-22000
C444	Induced	Promoters	chr11	20431662	20433050	-	0	0	uc007idc.1	20443255	20553026	+	promoter	-10898
C445	Repressed	Enhancers	chr11	20815125	20815520	0	0	0	intergenic	20815126	20815520	+	OUT	-22000
C446	Induced	Enhancers	chr11	20909704	20909936	-	0	0	intergenic	20909705	20909936	+	OUT	-22000
C447	Induced	Enhancers	chr11	20914303	20915076	-	0	0	intergenic	20914304	20915076	+	OUT	-22000
C448	Constitutive	Enhancers	chr11	20933847	20934482	0	0	0	intergenic	20933848	20934482	+	OUT	-22000
C449	Induced	Enhancers	chr11	20946073	20948484	-	1	0	intergenic	20946074	20948484	+	OUT	-22000
C450	Induced	Enhancers	chr11	20982697	20983211	-	0	0	uc007idk.1	20991326	21043008	+	promoter	-8371
C451	Repressed	Enhancers	chr11	21325459	21326041	0	0	0	intergenic	21325460	21326041	+	OUT	-22000
C452	Constitutive	Promoters	chr11	22967421	22968224	0	0	0	intergenic	22967422	22968224	+	OUT	-22000
C453	Constitutive	Enhancers	chr11	23535248	23535564	0	0	0	uc007iff.1	23464960	23533631	-	promoter	-1775
C454	Constitutive	Promoters	chr11	26540235	26540912	0	0	0	intergenic	26540236	26540912	+	OUT	-22000
C455	Induced	Enhancers	chr11	29547617	29548287	-	0	0	uc007ihj.1	29512325	29545510	-	promoter	-2442
C456	Induced	Enhancers	chr11	31632761	31633159	-	0	0	intergenic	31632762	31633159	+	OUT	-22000
C457	Induced	Enhancers	chr11	32171360	32171736	-	0	0	uc007iji.1	32132418	32167658	-	promoter	-3890
C458	Constitutive	Promoters	chr11	32224530	32224981	0	0	0	intergenic	32224531	32224981	+	OUT	-22000
C459	Induced	Promoters	chr11	43182152	43189373	-	0	0	intergenic	43182153	43189373	+	OUT	-22000
C460	Induced	Enhancers	chr11	43190053	43191995	-	1	0	intergenic	43190054	43191995	+	OUT	-22000
C461	Constitutive	Promoters	chr11	43193480	43200116	4	0	0	intergenic	43193481	43200116	+	OUT	-22000
C462	Induced	Promoters	chr11	43206361	43206838	-	0	0	intergenic	43206362	43206838	+	OUT	-22000
C463	Repressed	Enhancers	chr11	43446023	43446547	0	0	0	intergenic	43446024	43446547	+	OUT	-22000
C464	Induced	Promoters	chr11	44309486	44310040	-	0	0	intergenic	44309487	44310040	+	OUT	-22000
C465	Induced	Enhancers	chr11	44317661	44318330	-	0	0	uc007inh.1	44332465	44379018	+	promoter	-14469
C466	Induced	Enhancers	chr11	46614908	46615131	-	0	0	uc007iox.1	46624300	46657835	+	promoter	-9280
C467	Constitutive	Promoters	chr11	48601255	48601783	0	0	0	uc007ipa.1	48613861	48619743	+	promoter	-12341
C468	Induced	Enhancers	chr11	49050836	49051630	-	0	0	uc007iqb.1	49057747	49076526	+	promoter	-6513
C469	Induced	Enhancers	chr11	49568723	49568964	-	0	0	intergenic	49568724	49568964	+	OUT	-22000
C470	Constitutive	Promoters	chr11	50025907	50027283	3	0	0	uc007irw.1	50013653	50024292	-	promoter	-2303
C471	Repressed	Promoters	chr11	50184964	50185243	0	0	0	uc007isj.1	50190595	50200030	+	promoter	-5491
C472	Repressed	Enhancers	chr11	51687878	51688857	0	0	0	uc007iuq.1	51626957	51670983	-	promoter	-17385
C473	Repressed	Enhancers	chr11	51730897	51731397	0	0	0	intergenic	51730898	51731397	+	OUT	-22000
C474	Repressed	Enhancers	chr11	51734788	51735523	0	0	0	intergenic	51734789	51735523	+	OUT	-22000
C475	Repressed	Enhancers	chr11	51738746	51740985	0	0	0	intergenic	51738747	51740985	+	OUT	-22000
C476	Repressed	Enhancers	chr11	51744338	51747203	0	0	0	intergenic	51744339	51747203	+	OUT	-22000
C477	Constitutive	Promoters	chr11	53576022	53577862	0	0	0	uc007iww.1	53583579	53590825	+	promoter	-6636
C478	Constitutive	Enhancers	chr11	53706481	53706988	0	0	0	uc007ixc.1	53678043	53705162	-	promoter	-1573
C479	Repressed	Enhancers	chr11	53901872	53902659	0	0	0	uc007ixh.1	53914476	53925137	+	promoter	-12210
C480	Repressed	Enhancers	chr11	53905386	53905709	0	0	0	uc007ixh.1	53914476	53925137	+	promoter	-8928
C481	Repressed	Enhancers	chr11	53969284	53970262	0	0	0	intergenic	53969285	53970262	+	OUT	-22000
C482	Repressed	Enhancers	chr11	54615224	54616139	0	0	0	uc007iyf.1	54531003	54601138	-	promoter	-14544
C483	Repressed	Enhancers	chr11	54621123	54621384	0	0	0	uc007iyh.1	54633420	54638469	+	promoter	-12166
C484	Repressed	Enhancers	chr11	54698294	54699039	0	0	0	uc007iyk.1	54716354	54723889	+	promoter	-17687
C485	Repressed	Enhancers	chr11	55246549	55246783	0	0	0	uc007izh.1	55208002	55233367	-	promoter	-13299
C486	Induced	Promoters	chr11	57775725	57776626	-	0	0	intergenic	57775726	57776626	+	OUT	-22000
C487	Induced	Promoters	chr11	57906080	57906950	-	0	0	uc007jaj.1	57917654	57932096	+	promoter	-11138
C488	Constitutive	Promoters	chr11	57916195	57916545	1	0	0	uc007jaj.1	57917654	57932096	+	promoter	-1283
C489	Constitutive	Promoters	chr11	58449578	58449872	0	0	0	uc007jby.1	58453966	58465906	+	promoter	-4240
C490	Constitutive	Promoters	chr11	59205837	59206137	0	0	0	uc007jdr.1	59186170	59189155	-	promoter	-16832
C491	Constitutive	Enhancers	chr11	59351757	59353021	0	0	0	uc007jeh.1	59355086	59380458	+	promoter	-2696
C492	Constitutive	Promoters	chr11	61221506	61222171	0	0	0	intergenic	61221507	61222171	+	OUT	-22000
C493	Repressed	Enhancers	chr11	61282707	61283259	0	0	0	uc007jhj.1	61261943	61267388	-	promoter	-15595
C494	Repressed	Enhancers	chr11	61312272	61312630	0	0	0	uc007jhs.1	61302313	61307710	-	promoter	-4741
C495	Repressed	Enhancers	chr11	62828100	62828321	0	0	0	uc007jkk.1	62812616	62817636	-	promoter	-10575
C496	Repressed	Enhancers	chr11	62834045	62834493	0	0	0	uc007jkk.1	62812616	62817636	-	promoter	-16633
C497	Repressed	Enhancers	chr11	62840049	62840539	0	0	0	intergenic	62840050	62840539	+	OUT	-22000
C498	Repressed	Enhancers	chr11	62859296	62861357	0	0	0	uc007jkl.1	62875160	62908462	+	promoter	-14833
C499	Repressed	Enhancers	chr11	62863944	62866675	0	0	0	uc007jkl.1	62875160	62908462	+	promoter	-9850
C500	Induced	Promoters	chr11	65607797	65608278	-	0	0	uc007jlb.1	65501745	65601799	-	promoter	-6239
C501	Constitutive	Promoters	chr11	68825651	68826198	1	0	0	uc007jow.1	68829455	68849972	+	promoter	-3530
C502	Induced	Promoters	chr11	69059255	69059645	-	0	0	uc007jpo.1	69040132	69050524	-	promoter	-8926
C503	Induced	Enhancers	chr11	69079744	69080125	-	0	0	intergenic	69079745	69080125	+	OUT	-22000
C504	Repressed	Enhancers	chr11	69897997	69898532	0	0	0	uc007jtt.1	69906145	69919688	+	promoter	-7880
C505	Constitutive	Enhancers	chr11	69998537	69998907	0	0	0	intergenic	69998538	69998907	+	OUT	-22000
C506	Repressed	Enhancers	chr11	70003587	70004990	0	0	0	intergenic	70003588	70004990	+	OUT	-22000
C507	Repressed	Enhancers	chr11	70186336	70188242	0	0	0	intergenic	70186337	70188242	+	OUT	-22000
C508	Repressed	Enhancers	chr11	70189603	70190059	0	0	0	intergenic	70189604	70190059	+	OUT	-22000
C509	Repressed	Enhancers	chr11	70302499	70303521	0	0	0	uc007jvb.1	70318778	70324674	+	promoter	-15767
C510	Repressed	Enhancers	chr11	70313304	70313661	0	0	0	uc007jvb.1	70318778	70324674	+	promoter	-5295
C511	Repressed	Enhancers	chr11	70443793	70444013	0	0	0	uc007jvq.1	70452623	70455557	+	promoter	-8719
C512	Induced	Promoters	chr11	72754364	72754568	-	0	0	intergenic	72754365	72754568	+	OUT	-22000
C513	Repressed	Promoters	chr11	75092800	75093172	0	0	0	intergenic	75092801	75093172	+	OUT	-22000
C514	Constitutive	Enhancers	chr11	75271458	75272031	0	0	0	uc007kdv.1	75275040	75280192	+	promoter	-3295
C515	Repressed	Enhancers	chr11	76400109	76402087	1	1	0	uc007kfu.1	76230235	76391229	-	promoter	-9869
C516	Repressed	Enhancers	chr11	76403280	76403799	0	0	0	uc007kfu.1	76230235	76391229	-	promoter	-12311
C517	Repressed	Enhancers	chr11	76424023	76424296	0	0	0	intergenic	76424024	76424296	+	OUT	-22000
C518	Induced	Promoters	chr11	76435523	76437467	-	0	0	intergenic	76435524	76437467	+	OUT	-22000
C519	Repressed	Enhancers	chr11	76442168	76442608	0	0	0	intergenic	76442169	76442608	+	OUT	-22000
C520	Repressed	Enhancers	chr11	76670942	76671251	0	0	0	uc007kga.1	76590709	76660510	-	promoter	-10587
C521	Induced	Enhancers	chr11	76711271	76712382	-	0	0	uc007kgc.1	76715660	76730088	+	promoter	-3833
C522	Induced	Enhancers	chr11	76715274	76715533	-	0	0	uc007kgc.1	76715660	76730088	+	promoter	-256
C523	Repressed	Enhancers	chr11	77010332	77010525	0	0	0	uc007kgj.1	76903416	77002470	-	promoter	-7959
C524	Induced	Promoters	chr11	78700146	78700544	-	0	0	intergenic	78700147	78700544	+	OUT	-22000
C525	Induced	Promoters	chr11	78702023	78703074	-	0	0	intergenic	78702024	78703074	+	OUT	-22000
C526	Induced	Enhancers	chr11	78729043	78730151	-	0	0	uc007kkc.1	78734360	78773626	+	promoter	-4762
C527	Induced	Enhancers	chr11	79020793	79021677	-	0	0	intergenic	79020794	79021677	+	OUT	-22000
C528	Constitutive	Enhancers	chr11	79027614	79028027	0	0	0	intergenic	79027615	79028027	+	OUT	-22000
C529	Repressed	Enhancers	chr11	79038173	79038811	0	0	0	intergenic	79038174	79038811	+	OUT	-22000
C530	Repressed	Enhancers	chr11	79091893	79092960	0	0	0	intergenic	79091894	79092960	+	OUT	-22000
C531	Repressed	Enhancers	chr11	79099644	79101386	0	0	0	intergenic	79099645	79101386	+	OUT	-22000
C532	Repressed	Enhancers	chr11	79118806	79120885	0	1	1	intergenic	79118807	79120885	+	OUT	-22000
C533	Constitutive	Promoters	chr11	79524427	79525147	1	0	0	intergenic	79524428	79525147	+	OUT	-22000
C534	Induced	Promoters	chr11	79787075	79788201	-	0	0	uc007kkz.1	79745822	79775889	-	promoter	-11749
C535	Repressed	Enhancers	chr11	81809759	81810421	0	0	0	intergenic	81809760	81810421	+	OUT	-22000
C536	Repressed	Enhancers	chr11	81816894	81822127	1	0	0	intergenic	81816895	81822127	+	OUT	-22000
C537	Constitutive	Enhancers	chr11	81823804	81824333	0	0	0	intergenic	81823805	81824333	+	OUT	-22000
C538	Constitutive	Enhancers	chr11	81829211	81829830	0	0	0	uc007kmp.1	81849078	81850954	+	promoter	-19557
C539	Repressed	Enhancers	chr11	81829858	81830421	0	0	0	uc007kmp.1	81849078	81850954	+	promoter	-18938
C540	Repressed	Enhancers	chr11	81835819	81837670	0	1	0	uc007kmp.1	81849078	81850954	+	promoter	-12333
C541	Induced	Enhancers	chr11	81901648	81901912	-	0	0	uc007kms.1	81915346	81916901	+	promoter	-13565
C542	Induced	Promoters	chr11	82856747	82859593	-	0	0	uc007kof.1	82841629	82854035	-	promoter	-4135
C543	Constitutive	Enhancers	chr11	83084562	83088026	0	1	1	uc007kom.1	83105468	83108133	+	promoter	-19173
C544	Induced	Enhancers	chr11	83344984	83350793	-	0	0	uc007kpi.1	83339340	83343991	-	promoter	-3898
C545	Induced	Enhancers	chr11	83353152	83355666	-	0	0	uc007kpi.1	83339340	83343991	-	promoter	-10418
C546	Induced	Enhancers	chr11	83357054	83359223	-	0	0	uc007kpi.1	83339340	83343991	-	promoter	-14148
C547	Induced	Enhancers	chr11	83362867	83365777	-	0	0	uc007kpi.1	83339340	83343991	-	promoter	-20331
C548	Induced	Enhancers	chr11	83544799	83545335	-	0	0	uc007kps.1	83560441	83566148	+	promoter	-15373
C549	Induced	Enhancers	chr11	83551080	83551521	-	0	0	uc007kps.1	83560441	83566148	+	promoter	-9140
C550	Repressed	Enhancers	chr11	85062749	85064046	0	0	0	uc007krj.1	85004811	85048622	-	promoter	-14776
C551	Repressed	Enhancers	chr11	86721428	86721962	0	0	0	intergenic	86721429	86721962	+	OUT	-22000
C552	Repressed	Enhancers	chr11	86734055	86734373	0	0	0	intergenic	86734056	86734373	+	OUT	-22000
C553	Repressed	Enhancers	chr11	88047024	88048673	0	0	0	intergenic	88047025	88048673	+	OUT	-22000
C554	Constitutive	Enhancers	chr11	88048892	88049614	0	0	0	intergenic	88048893	88049614	+	OUT	-22000
C555	Repressed	Enhancers	chr11	88055135	88055758	0	0	0	intergenic	88055136	88055758	+	OUT	-22000
C556	Repressed	Enhancers	chr11	93682764	93683445	0	0	0	intergenic	93682765	93683445	+	OUT	-22000
C557	Repressed	Enhancers	chr11	93848897	93849719	0	0	0	uc007kxv.1	93857404	93911963	+	promoter	-8095
C558	Repressed	Enhancers	chr11	94006455	94006674	0	0	0	intergenic	94006456	94006674	+	OUT	-22000
C559	Constitutive	Enhancers	chr11	94022463	94023495	0	0	0	intergenic	94022464	94023495	+	OUT	-22000
C560	Induced	Enhancers	chr11	97273267	97274624	-	0	0	uc007leb.1	97276919	97276945	+	promoter	-2973
C561	Constitutive	Promoters	chr11	99043887	99044238	0	0	0	intergenic	99043888	99044238	+	OUT	-22000
C562	Induced	Enhancers	chr11	99050113	99050505	-	0	0	intergenic	99050114	99050505	+	OUT	-22000
C563	Induced	Enhancers	chr11	100861388	100861613	-	0	0	uc007lmt.1	100870768	100906138	+	promoter	-9267
C564	Constitutive	Promoters	chr11	101466040	101466826	0	0	1	uc007lpo.1	101472013	101477270	+	promoter	-5579
C565	Repressed	Promoters	chr11	102105937	102108020	2	0	0	uc007lqz.1	102110195	102126497	+	promoter	-3216
C566	Repressed	Enhancers	chr11	102285750	102287175	1	1	0	uc007lrv.1	102291820	102298119	+	promoter	-5357
C567	Constitutive	Enhancers	chr11	102883420	102883848	1	0	0	uc007ltc.1	102855369	102878461	-	promoter	-5173
C568	Repressed	Enhancers	chr11	103020423	103020726	0	0	0	uc007ltu.1	103032451	103060214	+	promoter	-11876
C569	Constitutive	Enhancers	chr11	103143215	103143699	0	0	0	uc007lua.1	103081077	103128715	-	promoter	-14742
C570	Repressed	Enhancers	chr11	103149703	103150045	0	0	0	intergenic	103149704	103150045	+	OUT	-22000
C571	Repressed	Enhancers	chr11	103169238	103169713	0	0	0	intergenic	103169239	103169713	+	OUT	-22000
C572	Induced	Enhancers	chr11	103280403	103280594	-	0	0	uc007lug.1	103226405	103273978	-	promoter	-6521
C573	Repressed	Enhancers	chr11	105321231	105321668	0	0	0	uc007lxl.1	105262967	105318038	-	promoter	-3412
C574	Repressed	Enhancers	chr11	105814910	105815067	0	0	0	uc007lxr.1	105795017	105805461	-	promoter	-9528
C575	Repressed	Enhancers	chr11	106822637	106823324	0	0	0	intergenic	106822638	106823324	+	OUT	-22000
C576	Constitutive	Promoters	chr11	106872950	106874361	1	0	1	uc007lzz.1	106849942	106860839	-	promoter	-12817
C577	Induced	Promoters	chr11	108872920	108873413	-	0	1	intergenic	108872921	108873413	+	OUT	-22000
C578	Repressed	Enhancers	chr11	108961474	108961736	0	0	0	intergenic	108961475	108961736	+	OUT	-22000
C579	Induced	Enhancers	chr11	109205260	109205783	-	0	0	uc007mcb.1	109208180	109214965	+	promoter	-2658
C580	Repressed	Promoters	chr11	109720779	109721045	0	0	0	intergenic	109720780	109721045	+	OUT	-22000
C581	Repressed	Enhancers	chr11	114826095	114827265	0	0	0	uc007mgc.1	114817591	114821731	-	promoter	-4949
C582	Repressed	Enhancers	chr11	114829487	114830676	0	0	0	uc007mgc.1	114817591	114821731	-	promoter	-8351
C583	Repressed	Enhancers	chr11	114866200	114868237	4	0	0	uc007mge.1	114858082	114863194	-	promoter	-4025
C584	Repressed	Enhancers	chr11	114923387	114923760	1	0	0	uc007mgk.1	114913230	114923352	-	promoter	-222
C585	Repressed	Enhancers	chr11	114925232	114925569	0	0	0	uc007mgk.1	114913230	114923352	-	promoter	-2049
C586	Repressed	Enhancers	chr11	114926591	114928022	0	0	0	uc007mgk.1	114913230	114923352	-	promoter	-3955
C587	Repressed	Enhancers	chr11	114931773	114934943	0	0	0	uc007mgk.1	114913230	114923352	-	promoter	-10006
C588	Constitutive	Promoters	chr11	115235426	115235890	0	0	0	uc007mhg.1	115209022	115229033	-	promoter	-6625
C589	Induced	Enhancers	chr11	115492435	115492859	-	0	0	uc007mig.1	115476296	115489453	-	promoter	-3194
C590	Repressed	Enhancers	chr11	115955015	115955318	0	0	0	uc007mjv.1	115939886	115948278	-	promoter	-6889
C591	Induced	Enhancers	chr11	116285176	116286042	-	1	0	uc007mlb.1	116295407	116300391	+	promoter	-9797
C592	Induced	Enhancers	chr11	116290607	116290986	-	0	0	uc007mlb.1	116295407	116300391	+	promoter	-4610
C593	Repressed	Enhancers	chr11	116970900	116971114	0	0	0	uc007mmz.1	116976562	116990077	+	promoter	-5554
C594	Repressed	Enhancers	chr11	117036162	117036647	0	0	0	intergenic	117036163	117036647	+	OUT	-22000
C595	Induced	Promoters	chr11	117460533	117460838	-	0	0	uc007mnh.1	117472658	117474111	+	promoter	-11972
C596	Constitutive	Enhancers	chr11	117740208	117740619	0	0	0	uc007mog.1	117729264	117734795	-	promoter	-5619
C597	Induced	Enhancers	chr11	117806536	117808683	-	0	0	intergenic	117806537	117808683	+	OUT	-22000
C598	Induced	Enhancers	chr11	117810175	117811944	-	1	0	intergenic	117810176	117811944	+	OUT	-22000
C599	Induced	Enhancers	chr11	117835481	117844395	-	1	0	uc007moj.1	117848170	117885325	+	promoter	-8231
C600	Constitutive	Enhancers	chr11	118223504	118224996	0	0	0	uc007mow.1	118162374	118216725	-	promoter	-7525
C601	Induced	Promoters	chr11	118841836	118842100	-	0	0	uc007mpr.1	118849501	118854155	+	promoter	-7532
C602	Induced	Promoters	chr11	118917982	118918575	-	0	0	uc007mpu.1	118899749	118902227	-	promoter	-16052
C603	Repressed	Enhancers	chr11	120080160	120080722	0	0	0	uc007msc.1	120076402	120078307	-	promoter	-2134
C604	Constitutive	Promoters	chr11	120177141	120178661	0	0	0	intergenic	120177142	120178661	+	OUT	-22000
C605	Induced	Promoters	chr11	120371873	120372432	-	0	0	uc007mtc.1	120392090	120400402	+	promoter	-19937
C606	Constitutive	Enhancers	chr11	120379344	120380125	0	0	0	uc007mtc.1	120392090	120400402	+	promoter	-12355
C607	Induced	Enhancers	chr11	120380880	120381494	-	0	0	uc007mtc.1	120392090	120400402	+	promoter	-10902
C608	Repressed	Enhancers	chr11	120799295	120800587	0	0	0	uc007muv.1	120687855	120794186	-	promoter	-5755
C609	Repressed	Enhancers	chr11	121547424	121547733	0	0	0	uc007mwb.1	121478085	121534453	-	promoter	-13126
C610	Constitutive	Enhancers	chr11	121558735	121560150	0	0	0	uc007mwd.1	121563740	121578703	+	promoter	-4297
C611	Repressed	Enhancers	chr11	121601897	121610940	0	1	0	intergenic	121601898	121610940	+	OUT	-22000
C612	Repressed	Enhancers	chr11	121642639	121643284	0	0	0	intergenic	121642640	121643284	+	OUT	-22000
C613	Repressed	Enhancers	chr11	121654475	121658676	0	0	0	uc007mwe.1	121664420	121671633	+	promoter	-7844
C614	Constitutive	Promoters	chr12	3356677	3357306	1	0	0	uc007mwm.1	3365131	3406494	+	promoter	-8139
C615	Induced	Enhancers	chr12	3360170	3360559	-	0	0	uc007mwm.1	3365131	3406494	+	promoter	-4766
C616	Repressed	Enhancers	chr12	4512136	4512666	0	0	0	intergenic	4512137	4512666	+	OUT	-22000
C617	Induced	Enhancers	chr12	4546399	4546754	-	0	0	intergenic	4546400	4546754	+	OUT	-22000
C618	Constitutive	Enhancers	chr12	4552224	4552442	0	0	0	intergenic	4552225	4552442	+	OUT	-22000
C619	Induced	Enhancers	chr12	8443737	8443922	-	0	0	intergenic	8443738	8443922	+	OUT	-22000
C620	Repressed	Promoters	chr12	8647448	8648042	0	0	0	intergenic	8647449	8648042	+	OUT	-22000
C621	Repressed	Enhancers	chr12	8674169	8674566	0	0	0	uc007mzu.1	8680939	8757145	+	promoter	-6571
C622	Repressed	Enhancers	chr12	8861256	8861702	0	0	0	intergenic	8861257	8861702	+	OUT	-22000
C623	Induced	Enhancers	chr12	12237166	12237293	-	0	0	intergenic	12237167	12237293	+	OUT	-22000
C624	Repressed	Enhancers	chr12	16872828	16873057	0	0	0	intergenic	16872829	16873057	+	OUT	-22000
C625	Repressed	Enhancers	chr12	16882204	16882901	0	0	0	uc007ncg.1	16901783	16984908	+	promoter	-19230
C626	Induced	Promoters	chr12	21549011	21549620	-	0	0	intergenic	21549012	21549620	+	OUT	-22000
C627	Constitutive	Promoters	chr12	25177817	25178753	2	0	0	uc007nei.1	25183496	25194611	+	promoter	-5210
C628	Induced	Enhancers	chr12	25828586	25828766	-	0	0	intergenic	25828587	25828766	+	OUT	-22000
C629	Repressed	Enhancers	chr12	25873501	25876581	1	0	0	intergenic	25873502	25876581	+	OUT	-22000
C630	Repressed	Enhancers	chr12	25882689	25882911	0	0	0	intergenic	25882690	25882911	+	OUT	-22000
C631	Repressed	Enhancers	chr12	25888303	25889003	0	0	0	intergenic	25888304	25889003	+	OUT	-22000
C632	Repressed	Enhancers	chr12	25892855	25893502	0	0	0	intergenic	25892856	25893502	+	OUT	-22000
C633	Constitutive	Enhancers	chr12	25893531	25894205	0	0	0	intergenic	25893532	25894205	+	OUT	-22000
C634	Repressed	Enhancers	chr12	25898090	25899918	0	0	0	intergenic	25898091	25899918	+	OUT	-22000
C635	Induced	Enhancers	chr12	26024763	26025237	-	0	0	intergenic	26024764	26025237	+	OUT	-22000
C636	Induced	Enhancers	chr12	26800284	26800602	-	0	0	intergenic	26800285	26800602	+	OUT	-22000
C637	Induced	Promoters	chr12	27149514	27150289	-	0	0	uc007nfj.1	27154079	27164702	+	promoter	-4177
C638	Induced	Enhancers	chr12	27151058	27151582	-	0	0	uc007nfj.1	27154079	27164702	+	promoter	-2758
C639	Induced	Promoters	chr12	27152935	27153252	-	0	0	uc007nfj.1	27154079	27164702	+	promoter	-985
C640	Constitutive	Promoters	chr12	29975706	29976002	0	0	0	intergenic	29975707	29976002	+	OUT	-22000
C641	Repressed	Enhancers	chr12	32823331	32823602	0	0	0	uc007nhz.1	32798533	32808567	-	promoter	-14900
C642	Repressed	Enhancers	chr12	32900115	32900435	0	0	0	uc007nia.1	32858337	32893514	-	promoter	-6761
C643	Repressed	Enhancers	chr12	32915152	32915341	0	0	0	intergenic	32915153	32915341	+	OUT	-22000
C644	Constitutive	Enhancers	chr12	32976797	32978183	0	0	0	intergenic	32976798	32978183	+	OUT	-22000
C645	Induced	Enhancers	chr12	32990767	32992437	-	0	0	intergenic	32990768	32992437	+	OUT	-22000
C646	Induced	Enhancers	chr12	33025282	33025624	-	0	0	intergenic	33025283	33025624	+	OUT	-22000
C647	Repressed	Enhancers	chr12	33115857	33116472	0	0	0	intergenic	33115858	33116472	+	OUT	-22000
C648	Repressed	Enhancers	chr12	33171731	33171932	0	0	0	intergenic	33171732	33171932	+	OUT	-22000
C649	Induced	Promoters	chr12	33478659	33478860	-	0	0	intergenic	33478660	33478860	+	OUT	-22000
C650	Induced	Promoters	chr12	33480525	33481812	-	0	0	intergenic	33480526	33481812	+	OUT	-22000
C651	Induced	Promoters	chr12	33702202	33702458	-	0	0	intergenic	33702203	33702458	+	OUT	-22000
C652	Induced	Promoters	chr12	35723533	35724033	-	0	0	uc007njf.1	35731888	35776638	+	promoter	-8104
C653	Repressed	Enhancers	chr12	36611930	36612111	0	0	0	intergenic	36611931	36612111	+	OUT	-22000
C654	Repressed	Promoters	chr12	39655398	39655873	0	0	0	intergenic	39655399	39655873	+	OUT	-22000
C655	Constitutive	Promoters	chr12	52945761	52946271	0	0	0	uc007nmz.1	52891468	52930340	-	promoter	-15676
C656	Repressed	Enhancers	chr12	55505500	55506607	0	0	0	intergenic	55505501	55506607	+	OUT	-22000
C657	Repressed	Enhancers	chr12	55922130	55922394	0	0	0	intergenic	55922131	55922394	+	OUT	-22000
C658	Repressed	Enhancers	chr12	55975943	55976209	0	0	0	uc007nnx.1	55959805	55963864	-	promoter	-12212
C659	Repressed	Enhancers	chr12	56099993	56100630	0	0	0	uc007noc.1	56035726	56087323	-	promoter	-12989
C660	Repressed	Enhancers	chr12	56120517	56120882	0	0	0	intergenic	56120518	56120882	+	OUT	-22000
C661	Induced	Enhancers	chr12	56544037	56544623	-	0	0	intergenic	56544038	56544623	+	OUT	-22000
C662	Induced	Promoters	chr12	56565351	56569930	-	0	0	intergenic	56565352	56569930	+	OUT	-22000
C663	Induced	Enhancers	chr12	56574562	56575077	-	0	0	intergenic	56574563	56575077	+	OUT	-22000
C664	Induced	Promoters	chr12	56661104	56661563	-	0	0	uc007nos.1	56666205	56667883	+	promoter	-4871
C665	Repressed	Promoters	chr12	59639268	59639447	0	0	0	intergenic	59639269	59639447	+	OUT	-22000
C666	Constitutive	Enhancers	chr12	70523754	70524212	0	0	0	intergenic	70523755	70524212	+	OUT	-22000
C667	Repressed	Enhancers	chr12	70525836	70526035	0	0	0	intergenic	70525837	70526035	+	OUT	-22000
C668	Repressed	Promoters	chr12	70547031	70549858	0	0	0	intergenic	70547032	70549858	+	OUT	-22000
C669	Repressed	Enhancers	chr12	70586581	70587333	0	0	0	uc007nsk.1	70565773	70576534	-	promoter	-10423
C670	Constitutive	Promoters	chr12	70601563	70605938	3	0	0	intergenic	70601564	70605938	+	OUT	-22000
C671	Induced	Enhancers	chr12	70614008	70614651	-	0	0	intergenic	70614009	70614651	+	OUT	-22000
C672	Constitutive	Enhancers	chr12	70617456	70617950	0	0	0	intergenic	70617457	70617950	+	OUT	-22000
C673	Repressed	Enhancers	chr12	70638040	70640437	0	0	0	intergenic	70638041	70640437	+	OUT	-22000
C674	Constitutive	Promoters	chr12	71237064	71237787	0	0	0	uc007ntl.1	71255128	71284334	+	promoter	-17702
C675	Repressed	Enhancers	chr12	71241481	71241789	0	0	0	uc007ntl.1	71255128	71284334	+	promoter	-13492
C676	Constitutive	Promoters	chr12	73921760	73922186	0	0	0	intergenic	73921761	73922186	+	OUT	-22000
C677	Constitutive	Enhancers	chr12	73944918	73945751	0	0	1	intergenic	73944919	73945751	+	OUT	-22000
C678	Induced	Enhancers	chr12	74545986	74546560	-	0	0	intergenic	74545987	74546560	+	OUT	-22000
C679	Constitutive	Enhancers	chr12	74889987	74890316	0	0	0	intergenic	74889988	74890316	+	OUT	-22000
C680	Induced	Enhancers	chr12	74981194	74982767	-	0	0	uc007nwo.1	75002361	75047878	+	promoter	-20380
C681	Constitutive	Promoters	chr12	75417984	75418265	0	0	0	intergenic	75417985	75418265	+	OUT	-22000
C682	Constitutive	Promoters	chr12	75904894	75905496	0	0	0	intergenic	75904895	75905496	+	OUT	-22000
C683	Repressed	Enhancers	chr12	75925974	75926544	0	0	0	intergenic	75925975	75926544	+	OUT	-22000
C684	Repressed	Enhancers	chr12	78121039	78121490	0	0	0	intergenic	78121040	78121490	+	OUT	-22000
C685	Induced	Promoters	chr12	78160935	78161675	-	0	0	intergenic	78160936	78161675	+	OUT	-22000
C686	Repressed	Enhancers	chr12	80118852	80119181	0	0	0	uc007nzq.1	80062786	80108326	-	promoter	-10691
C687	Repressed	Enhancers	chr12	80942322	80942577	0	0	0	intergenic	80942323	80942577	+	OUT	-22000
C688	Repressed	Enhancers	chr12	81115185	81115566	0	0	0	intergenic	81115186	81115566	+	OUT	-22000
C689	Induced	Enhancers	chr12	81886258	81886478	-	0	0	uc007obi.1	81891545	81981820	+	promoter	-5176
C690	Induced	Enhancers	chr12	82908267	82908699	-	0	0	intergenic	82908268	82908699	+	OUT	-22000
C691	Repressed	Enhancers	chr12	85268776	85268941	0	0	0	uc007odx.1	85136388	85262808	-	promoter	-6051
C692	Constitutive	Enhancers	chr12	85288069	85288945	0	0	0	uc007odz.1	85291619	85293895	+	promoter	-3111
C693	Repressed	Enhancers	chr12	86533514	86533872	0	0	0	uc007ogq.1	86507590	86518235	-	promoter	-15458
C694	Repressed	Enhancers	chr12	86721299	86722692	1	0	0	uc007ogz.1	86681563	86715667	-	promoter	-6329
C695	Repressed	Enhancers	chr12	86726289	86727210	0	0	0	uc007ogz.1	86681563	86715667	-	promoter	-11083
C696	Repressed	Enhancers	chr12	86734799	86735168	0	0	0	uc007ogz.1	86681563	86715667	-	promoter	-19317
C697	Repressed	Enhancers	chr12	86736609	86736942	0	0	0	intergenic	86736610	86736942	+	OUT	-22000
C698	Repressed	Enhancers	chr12	86738193	86738456	0	0	0	intergenic	86738194	86738456	+	OUT	-22000
C699	Induced	Enhancers	chr12	86785277	86786345	-	1	0	intergenic	86785278	86786345	+	OUT	-22000
C700	Repressed	Promoters	chr12	86796372	86796779	0	0	0	uc007oha.1	86814850	86818219	+	promoter	-18274
C701	Constitutive	Enhancers	chr12	86809742	86810255	0	0	0	uc007oha.1	86814850	86818219	+	promoter	-4851
C702	Repressed	Promoters	chr12	86828235	86828928	0	0	0	intergenic	86828236	86828928	+	OUT	-22000
C703	Repressed	Enhancers	chr12	86830071	86831736	0	0	0	intergenic	86830072	86831736	+	OUT	-22000
C704	Repressed	Enhancers	chr12	86873649	86874293	0	0	0	intergenic	86873650	86874293	+	OUT	-22000
C705	Induced	Enhancers	chr12	87007501	87008037	-	0	0	uc007ohd.1	87027669	87050037	+	promoter	-19899
C706	Constitutive	Enhancers	chr12	87010942	87011349	0	0	0	uc007ohd.1	87027669	87050037	+	promoter	-16523
C707	Repressed	Enhancers	chr12	88128236	88128659	0	0	0	intergenic	88128237	88128659	+	OUT	-22000
C708	Repressed	Enhancers	chr12	88141688	88143030	0	0	0	intergenic	88141689	88143030	+	OUT	-22000
C709	Constitutive	Enhancers	chr12	88144086	88144805	0	0	0	intergenic	88144087	88144805	+	OUT	-22000
C710	Repressed	Enhancers	chr12	88151640	88152569	0	0	0	intergenic	88151641	88152569	+	OUT	-22000
C711	Constitutive	Enhancers	chr12	88159626	88161663	1	0	0	intergenic	88159627	88161663	+	OUT	-22000
C712	Repressed	Promoters	chr12	88164164	88167028	1	0	0	intergenic	88164165	88167028	+	OUT	-22000
C713	Repressed	Enhancers	chr12	88172709	88176062	0	0	0	intergenic	88172710	88176062	+	OUT	-22000
C714	Constitutive	Promoters	chr12	88176187	88177196	0	0	0	intergenic	88176188	88177196	+	OUT	-22000
C715	Repressed	Enhancers	chr12	88177225	88178054	0	0	0	intergenic	88177226	88178054	+	OUT	-22000
C716	Induced	Enhancers	chr12	88200447	88200970	-	0	0	intergenic	88200448	88200970	+	OUT	-22000
C717	Constitutive	Enhancers	chr12	88228806	88230711	0	0	0	uc007oia.1	88221650	88225761	-	promoter	-3998
C718	Constitutive	Promoters	chr12	88231762	88235342	2	0	0	uc007oia.1	88221650	88225761	-	promoter	-7791
C719	Repressed	Enhancers	chr12	88248763	88248979	0	0	0	intergenic	88248764	88248979	+	OUT	-22000
C720	Repressed	Enhancers	chr12	88251040	88251364	0	0	0	intergenic	88251041	88251364	+	OUT	-22000
C721	Repressed	Enhancers	chr12	88255173	88256189	1	0	0	intergenic	88255174	88256189	+	OUT	-22000
C722	Repressed	Enhancers	chr12	88748576	88749395	0	0	0	uc007oiw.1	88648838	88729180	-	promoter	-19806
C723	Repressed	Enhancers	chr12	99613676	99614004	0	0	0	intergenic	99613677	99614004	+	OUT	-22000
C724	Induced	Enhancers	chr12	100872045	100872237	-	0	0	uc007osa.1	100864281	100866184	-	promoter	-5957
C725	Repressed	Promoters	chr12	100879720	100879980	0	0	0	uc007osa.1	100864281	100866184	-	promoter	-13666
C726	Repressed	Enhancers	chr12	101406516	101407161	0	0	0	uc007oso.1	101363661	101389544	-	promoter	-17295
C727	Repressed	Enhancers	chr12	101422122	101422897	0	0	0	uc007osp.1	101426177	101431748	+	promoter	-3667
C728	Induced	Enhancers	chr12	101515970	101516270	-	0	0	uc007osr.1	101528434	101540517	+	promoter	-12313
C729	Repressed	Enhancers	chr12	101766423	101766700	0	0	0	uc007oss.1	101539746	101759002	-	promoter	-7560
C730	Repressed	Enhancers	chr12	101769142	101769483	0	0	0	uc007oss.1	101539746	101759002	-	promoter	-10311
C731	Repressed	Promoters	chr12	101967361	101967714	0	0	0	uc007osv.1	101832593	101965193	-	promoter	-2345
C732	Repressed	Enhancers	chr12	102014114	102014576	0	0	0	uc007osw.1	102017332	102110820	+	promoter	-2986
C733	Induced	Promoters	chr12	103208501	103208772	-	0	0	uc007otx.1	103214208	103243739	+	promoter	-5571
C734	Repressed	Enhancers	chr12	103688487	103691793	0	1	0	uc007ouf.1	103632307	103677907	-	promoter	-12233
C735	Constitutive	Enhancers	chr12	103693931	103694162	0	0	0	uc007oug.1	103707344	103736117	+	promoter	-13297
C736	Repressed	Enhancers	chr12	103755923	103756295	0	0	0	intergenic	103755924	103756295	+	OUT	-22000
C737	Constitutive	Promoters	chr12	103951335	103951933	0	0	0	uc007ouj.1	103806792	103943079	-	promoter	-8555
C738	Constitutive	Enhancers	chr12	103959095	103959489	0	0	0	uc007ouj.1	103806792	103943079	-	promoter	-16213
C739	Induced	Enhancers	chr12	103968533	103969184	-	0	0	uc007oul.1	103981949	103983607	+	promoter	-13090
C740	Induced	Promoters	chr12	105409898	105410163	-	0	0	uc007owv.1	105385116	105392082	-	promoter	-17949
C741	Repressed	Enhancers	chr12	105424293	105424557	0	0	0	intergenic	105424294	105424557	+	OUT	-22000
C742	Induced	Enhancers	chr12	105425890	105426024	-	0	0	intergenic	105425891	105426024	+	OUT	-22000
C743	Induced	Enhancers	chr12	105428474	105428620	-	0	0	intergenic	105428475	105428620	+	OUT	-22000
C744	Induced	Enhancers	chr12	105429676	105429914	-	0	0	intergenic	105429677	105429914	+	OUT	-22000
C745	Repressed	Enhancers	chr12	106251466	106251812	0	0	0	uc007oxs.1	106168158	106248019	-	promoter	-3620
C746	Induced	Enhancers	chr12	106258131	106258401	-	0	0	uc007oxs.1	106168158	106248019	-	promoter	-10247
C747	Induced	Promoters	chr12	107173173	107173972	-	0	0	intergenic	107173174	107173972	+	OUT	-22000
C748	Induced	Promoters	chr12	108883859	108884132	-	0	0	intergenic	108883860	108884132	+	OUT	-22000
C749	Repressed	Enhancers	chr12	109325052	109325254	0	0	0	intergenic	109325053	109325254	+	OUT	-22000
C750	Repressed	Enhancers	chr12	109326450	109326661	0	0	0	intergenic	109326451	109326661	+	OUT	-22000
C751	Constitutive	Promoters	chr12	109995817	109996694	0	0	0	intergenic	109995818	109996694	+	OUT	-22000
C752	Repressed	Enhancers	chr12	109999306	109999940	0	1	0	intergenic	109999307	109999940	+	OUT	-22000
C753	Constitutive	Promoters	chr12	110001156	110005583	3	0	0	intergenic	110001157	110005583	+	OUT	-22000
C754	Repressed	Enhancers	chr12	111944840	111945207	0	0	0	uc007pbr.1	111929245	111934605	-	promoter	-10419
C755	Repressed	Promoters	chr12	112229681	112230854	0	0	0	uc007pci.1	112213562	112217231	-	promoter	-13037
C756	Induced	Enhancers	chr12	112753151	112753502	-	0	0	uc007pdb.1	112688615	112737833	-	promoter	-15494
C757	Repressed	Enhancers	chr12	113182752	113185095	0	0	0	uc007pee.1	113180557	113182686	-	promoter	-1238
C758	Repressed	Enhancers	chr12	113816976	113817369	0	0	0	uc007pes.1	113826994	113853768	+	promoter	-9821
C759	Constitutive	Promoters	chr12	113931359	113932283	0	0	0	uc007pex.1	113892031	113912401	-	promoter	-19420
C760	Constitutive	Enhancers	chr12	114071810	114072173	0	0	0	uc007pfj.1	114058445	114067634	-	promoter	-4358
C761	Repressed	Enhancers	chr12	114078441	114078815	0	0	0	uc007pfj.1	114058445	114067634	-	promoter	-10994
C762	Induced	Enhancers	chr12	114102617	114107123	-	0	0	uc007pfk.1	114089086	114099127	-	promoter	-5743
C763	Induced	Enhancers	chr12	114108891	114109379	-	0	0	uc007pfk.1	114089086	114099127	-	promoter	-10008
C764	Repressed	Enhancers	chr12	114133250	114133812	0	0	0	intergenic	114133251	114133812	+	OUT	-22000
C765	Repressed	Enhancers	chr12	114135590	114136454	0	0	0	intergenic	114135591	114136454	+	OUT	-22000
C766	Repressed	Enhancers	chr12	118717289	118719285	0	0	0	intergenic	118717290	118719285	+	OUT	-22000
C767	Constitutive	Promoters	chr13	3360265	3360442	0	0	0	intergenic	3360266	3360442	+	OUT	-22000
C768	Constitutive	Promoters	chr13	4661903	4662395	0	0	0	intergenic	4661904	4662395	+	OUT	-22000
C769	Repressed	Enhancers	chr13	5604202	5604681	0	0	0	intergenic	5604203	5604681	+	OUT	-22000
C770	Induced	Enhancers	chr13	5776780	5778614	-	0	0	intergenic	5776781	5778614	+	OUT	-22000
C771	Induced	Enhancers	chr13	5785553	5786509	-	0	0	intergenic	5785554	5786509	+	OUT	-22000
C772	Induced	Enhancers	chr13	5787767	5790087	-	0	0	intergenic	5787768	5790087	+	OUT	-22000
C773	Repressed	Enhancers	chr13	5801430	5804121	0	1	0	intergenic	5801431	5804121	+	OUT	-22000
C774	Induced	Enhancers	chr13	5816434	5817643	-	0	0	intergenic	5816435	5817643	+	OUT	-22000
C775	Induced	Enhancers	chr13	5828803	5829216	-	0	0	intergenic	5828804	5829216	+	OUT	-22000
C776	Constitutive	Enhancers	chr13	5886246	5886533	0	0	0	intergenic	5886247	5886533	+	OUT	-22000
C777	Repressed	Enhancers	chr13	5886728	5889069	0	0	0	intergenic	5886729	5889069	+	OUT	-22000
C778	Repressed	Enhancers	chr13	9190319	9190915	0	0	0	intergenic	9190320	9190915	+	OUT	-22000
C779	Repressed	Enhancers	chr13	13629867	13631833	0	0	0	intergenic	13629868	13631833	+	OUT	-22000
C780	Repressed	Enhancers	chr13	13643571	13643790	0	0	0	intergenic	13643572	13643790	+	OUT	-22000
C781	Constitutive	Enhancers	chr13	19946346	19946910	0	0	0	intergenic	19946347	19946910	+	OUT	-22000
C782	Induced	Enhancers	chr13	20877818	20880329	-	0	0	uc007pps.1	20885987	20893696	+	promoter	-6913
C783	Constitutive	Enhancers	chr13	21944231	21944661	0	0	0	uc007prx.1	21925639	21926020	-	promoter	-18426
C784	Repressed	Promoters	chr13	22005891	22006117	0	0	0	intergenic	22005892	22006117	+	OUT	-22000
C785	Induced	Promoters	chr13	22112300	22112635	-	0	0	uc007prz.1	22094044	22101610	-	promoter	-10858
C786	Induced	Promoters	chr13	23537046	23537996	-	0	0	uc007ptp.1	23519844	23522886	-	promoter	-14635
C787	Induced	Promoters	chr13	23608180	23608468	-	0	0	uc007ptv.1	23622918	23623388	+	promoter	-14593
C788	Repressed	Enhancers	chr13	23820846	23821500	0	0	0	uc007puq.1	23830675	23832235	+	promoter	-9501
C789	Repressed	Promoters	chr13	24881050	24883118	0	0	0	uc007pwi.1	24893525	24904768	+	promoter	-11440
C790	Repressed	Enhancers	chr13	34807256	34807473	0	0	0	uc007qbl.1	34826718	34839491	+	promoter	-19353
C791	Induced	Enhancers	chr13	35170361	35172407	-	0	0	intergenic	35170362	35172407	+	OUT	-22000
C792	Induced	Enhancers	chr13	35300177	35300471	-	0	0	intergenic	35300178	35300471	+	OUT	-22000
C793	Induced	Enhancers	chr13	35621628	35621882	-	0	0	uc007qcd.1	35635771	35637353	+	promoter	-14015
C794	Repressed	Enhancers	chr13	35739263	35739775	0	0	0	uc007qce.1	35751748	35965493	+	promoter	-12228
C795	Repressed	Enhancers	chr13	37148478	37148730	0	0	0	uc007qco.1	36959055	37142113	-	promoter	-6491
C796	Repressed	Enhancers	chr13	37382575	37382795	0	0	0	intergenic	37382576	37382795	+	OUT	-22000
C797	Induced	Enhancers	chr13	37429178	37429586	-	0	0	uc007qcr.1	37437213	37510813	+	promoter	-7830
C798	Constitutive	Promoters	chr13	37543858	37544617	0	0	0	uc007qct.1	37541268	37543026	-	promoter	-1212
C799	Induced	Enhancers	chr13	37547387	37547714	-	0	0	uc007qct.1	37541268	37543026	-	promoter	-4525
C800	Induced	Enhancers	chr13	37672597	37673092	-	0	0	intergenic	37672598	37673092	+	OUT	-22000
C801	Repressed	Enhancers	chr13	37711652	37712388	0	0	0	intergenic	37711653	37712388	+	OUT	-22000
C802	Repressed	Enhancers	chr13	37734326	37734799	0	0	0	intergenic	37734327	37734799	+	OUT	-22000
C803	Induced	Promoters	chr13	37749805	37750365	-	0	0	intergenic	37749806	37750365	+	OUT	-22000
C804	Constitutive	Enhancers	chr13	37770582	37771080	0	0	0	intergenic	37770583	37771080	+	OUT	-22000
C805	Repressed	Enhancers	chr13	37843554	37843839	0	0	0	intergenic	37843555	37843839	+	OUT	-22000
C806	Repressed	Enhancers	chr13	37853015	37853214	0	0	0	intergenic	37853016	37853214	+	OUT	-22000
C807	Constitutive	Promoters	chr13	37869857	37871554	4	0	0	intergenic	37869858	37871554	+	OUT	-22000
C808	Repressed	Enhancers	chr13	41214505	41214836	0	0	0	uc007qfa.1	41196795	41205552	-	promoter	-9119
C809	Induced	Enhancers	chr13	41678963	41679436	-	0	0	intergenic	41678964	41679436	+	OUT	-22000
C810	Induced	Promoters	chr13	41700473	41702204	-	0	0	intergenic	41700474	41702204	+	OUT	-22000
C811	Induced	Enhancers	chr13	41707608	41707858	-	0	0	intergenic	41707609	41707858	+	OUT	-22000
C812	Induced	Promoters	chr13	42339347	42341058	-	0	0	intergenic	42339348	42341058	+	OUT	-22000
C813	Induced	Enhancers	chr13	42349355	42349656	-	0	0	intergenic	42349356	42349656	+	OUT	-22000
C814	Induced	Enhancers	chr13	42354082	42354595	-	0	0	intergenic	42354083	42354595	+	OUT	-22000
C815	Constitutive	Enhancers	chr13	42463181	42463468	0	0	0	intergenic	42463182	42463468	+	OUT	-22000
C816	Induced	Enhancers	chr13	42467512	42467714	-	0	0	intergenic	42467513	42467714	+	OUT	-22000
C817	Induced	Enhancers	chr13	42469572	42469784	-	0	0	intergenic	42469573	42469784	+	OUT	-22000
C818	Induced	Enhancers	chr13	42488097	42488918	-	0	0	intergenic	42488098	42488918	+	OUT	-22000
C819	Constitutive	Enhancers	chr13	43620261	43620608	0	0	0	intergenic	43620262	43620608	+	OUT	-22000
C820	Repressed	Enhancers	chr13	43860728	43861024	0	0	0	uc007qgj.1	43880553	43898501	+	promoter	-19676
C821	Induced	Enhancers	chr13	43872433	43874084	-	0	0	uc007qgj.1	43880553	43898501	+	promoter	-7294
C822	Constitutive	Enhancers	chr13	43959690	43960180	0	0	0	intergenic	43959691	43960180	+	OUT	-22000
C823	Induced	Enhancers	chr13	44499205	44499983	-	0	0	intergenic	44499206	44499983	+	OUT	-22000
C824	Constitutive	Enhancers	chr13	44514700	44515508	0	0	0	uc007qgq.1	44535095	44552936	+	promoter	-19990
C825	Constitutive	Enhancers	chr13	44599580	44600156	0	0	0	intergenic	44599581	44600156	+	OUT	-22000
C826	Induced	Enhancers	chr13	44602230	44604041	-	0	0	intergenic	44602231	44604041	+	OUT	-22000
C827	Induced	Enhancers	chr13	44628026	44628692	-	0	0	intergenic	44628027	44628692	+	OUT	-22000
C828	Constitutive	Enhancers	chr13	44630041	44632378	0	0	0	intergenic	44630042	44632378	+	OUT	-22000
C829	Constitutive	Enhancers	chr13	46138409	46139194	0	0	0	intergenic	46138410	46139194	+	OUT	-22000
C830	Constitutive	Enhancers	chr13	48633420	48633877	1	0	0	intergenic	48633421	48633877	+	OUT	-22000
C831	Constitutive	Enhancers	chr13	48635614	48635944	0	0	0	intergenic	48635615	48635944	+	OUT	-22000
C832	Constitutive	Promoters	chr13	48639001	48639699	3	0	0	intergenic	48639002	48639699	+	OUT	-22000
C833	Induced	Promoters	chr13	48640671	48642438	-	0	0	intergenic	48640672	48642438	+	OUT	-22000
C834	Constitutive	Enhancers	chr13	48647356	48648410	0	0	0	intergenic	48647357	48648410	+	OUT	-22000
C835	Induced	Enhancers	chr13	49268716	49268904	-	0	0	uc007qiw.1	49282915	49291620	+	promoter	-14104
C836	Induced	Enhancers	chr13	49273373	49274720	-	0	0	uc007qiw.1	49282915	49291620	+	promoter	-8868
C837	Repressed	Enhancers	chr13	49346282	49348304	0	0	0	uc007qja.1	49326201	49344075	-	promoter	-3218
C838	Repressed	Enhancers	chr13	49416849	49417774	0	0	0	uc007qje.1	49368750	49415680	-	promoter	-1632
C839	Repressed	Enhancers	chr13	49419013	49419795	0	0	0	uc007qje.1	49368750	49415680	-	promoter	-3724
C840	Induced	Promoters	chr13	51167180	51167637	-	0	0	intergenic	51167181	51167637	+	OUT	-22000
C841	Constitutive	Promoters	chr13	51298184	51298414	1	0	0	intergenic	51298185	51298414	+	OUT	-22000
C842	Repressed	Enhancers	chr13	51496279	51496930	0	0	0	uc007qmf.1	51504132	51518166	+	promoter	-7527
C843	Constitutive	Enhancers	chr13	51938042	51938506	0	0	0	uc007qmq.1	51942063	51943843	+	promoter	-3788
C844	Repressed	Enhancers	chr13	52041692	52042052	0	0	0	intergenic	52041693	52042052	+	OUT	-22000
C845	Repressed	Enhancers	chr13	52091687	52091887	0	0	0	intergenic	52091688	52091887	+	OUT	-22000
C846	Repressed	Enhancers	chr13	52156844	52157492	0	0	0	intergenic	52156845	52157492	+	OUT	-22000
C847	Induced	Enhancers	chr13	52331399	52332303	-	0	0	intergenic	52331400	52332303	+	OUT	-22000
C848	Induced	Promoters	chr13	53119621	53119882	-	0	0	intergenic	53119622	53119882	+	OUT	-22000
C849	Constitutive	Enhancers	chr13	55202763	55203332	0	0	0	uc007qpv.1	55129240	55201656	-	promoter	-1392
C850	Constitutive	Promoters	chr13	55291298	55292029	0	0	0	uc007qqd.1	55311142	55419686	+	promoter	-19478
C851	Induced	Enhancers	chr13	55530484	55531283	-	0	0	uc007qqv.1	55519350	55528141	-	promoter	-2743
C852	Repressed	Enhancers	chr13	56282542	56285820	1	0	0	uc007qsj.1	56275073	56280162	-	promoter	-4019
C853	Repressed	Enhancers	chr13	56435718	56436689	0	1	0	intergenic	56435719	56436689	+	OUT	-22000
C854	Repressed	Enhancers	chr13	56453467	56454703	0	0	0	intergenic	56453468	56454703	+	OUT	-22000
C855	Induced	Enhancers	chr13	58622437	58622654	-	0	0	intergenic	58622438	58622654	+	OUT	-22000
C856	Repressed	Enhancers	chr13	59936564	59936842	0	0	0	uc007qvh.1	59921478	59924494	-	promoter	-12209
C857	Repressed	Enhancers	chr13	59976960	59978330	0	0	0	intergenic	59976961	59978330	+	OUT	-22000
C858	Constitutive	Promoters	chr13	62117145	62117463	1	0	0	intergenic	62117146	62117463	+	OUT	-22000
C859	Constitutive	Enhancers	chr13	64503308	64503652	0	0	0	intergenic	64503309	64503652	+	OUT	-22000
C860	Repressed	Enhancers	chr13	64523556	64524550	0	0	0	uc007qyx.1	64533860	64541029	+	promoter	-9806
C861	Constitutive	Promoters	chr13	65341822	65343021	1	0	0	intergenic	65341823	65343021	+	OUT	-22000
C862	Constitutive	Promoters	chr13	65357774	65358076	0	0	0	intergenic	65357775	65358076	+	OUT	-22000
C863	Repressed	Promoters	chr13	65358468	65358732	0	0	0	intergenic	65358469	65358732	+	OUT	-22000
C864	Repressed	Enhancers	chr13	73596713	73596996	0	0	0	uc007rdk.1	73604830	73651986	+	promoter	-7975
C865	Induced	Promoters	chr13	74528133	74528350	-	0	0	uc007rff.1	74508873	74514014	-	promoter	-14228
C866	Constitutive	Promoters	chr13	74599973	74600982	0	0	0	intergenic	74599974	74600982	+	OUT	-22000
C867	Repressed	Promoters	chr13	74659775	74660316	0	0	0	intergenic	74659776	74660316	+	OUT	-22000
C868	Constitutive	Promoters	chr13	74660328	74660800	0	0	0	intergenic	74660329	74660800	+	OUT	-22000
C869	Constitutive	Promoters	chr13	74666612	74667128	0	0	0	intergenic	74666613	74667128	+	OUT	-22000
C870	Constitutive	Promoters	chr13	74701217	74701985	0	0	0	intergenic	74701218	74701985	+	OUT	-22000
C871	Constitutive	Promoters	chr13	74754629	74755492	0	0	0	intergenic	74754630	74755492	+	OUT	-22000
C872	Repressed	Enhancers	chr13	75960689	75960936	0	0	0	uc007rfx.1	75977367	75987597	+	promoter	-16554
C873	Repressed	Enhancers	chr13	75962156	75962448	0	0	0	uc007rfx.1	75977367	75987597	+	promoter	-15064
C874	Repressed	Enhancers	chr13	83205079	83205274	0	0	0	intergenic	83205080	83205274	+	OUT	-22000
C875	Repressed	Promoters	chr13	83213642	83214101	0	0	0	intergenic	83213643	83214101	+	OUT	-22000
C876	Repressed	Enhancers	chr13	94000887	94001430	0	0	0	intergenic	94000888	94001430	+	OUT	-22000
C877	Repressed	Enhancers	chr13	94007752	94008002	0	0	0	intergenic	94007753	94008002	+	OUT	-22000
C878	Induced	Promoters	chr13	94071030	94071389	-	0	0	uc007rlb.1	94074753	94126407	+	promoter	-3543
C879	Repressed	Enhancers	chr13	94747186	94747488	0	0	0	intergenic	94747187	94747488	+	OUT	-22000
C880	Constitutive	Enhancers	chr13	95065760	95066739	0	0	0	uc007rlu.1	95059402	95064961	-	promoter	-1289
C881	Repressed	Enhancers	chr13	95068528	95068844	0	0	0	uc007rlu.1	95059402	95064961	-	promoter	-3725
C882	Repressed	Enhancers	chr13	95071193	95071394	1	0	0	uc007rlu.1	95059402	95064961	-	promoter	-6333
C883	Repressed	Enhancers	chr13	98212326	98212733	0	0	0	intergenic	98212327	98212733	+	OUT	-22000
C884	Induced	Enhancers	chr13	98280817	98281202	-	0	0	intergenic	98280818	98281202	+	OUT	-22000
C885	Repressed	Enhancers	chr13	98316041	98316280	0	0	0	intergenic	98316042	98316280	+	OUT	-22000
C886	Repressed	Enhancers	chr13	98329664	98330059	0	0	0	intergenic	98329665	98330059	+	OUT	-22000
C887	Repressed	Enhancers	chr13	99738174	99738388	0	0	0	intergenic	99738175	99738388	+	OUT	-22000
C888	Repressed	Enhancers	chr13	99776321	99776525	0	0	0	uc007rpj.1	99777053	99791650	+	promoter	-629
C889	Repressed	Enhancers	chr13	101636107	101636475	0	0	0	intergenic	101636108	101636475	+	OUT	-22000
C890	Repressed	Enhancers	chr13	101643638	101643834	0	0	0	intergenic	101643639	101643834	+	OUT	-22000
C891	Repressed	Enhancers	chr13	102310378	102310998	0	0	0	intergenic	102310379	102310998	+	OUT	-22000
C892	Constitutive	Enhancers	chr13	102428888	102429332	0	0	0	intergenic	102428889	102429332	+	OUT	-22000
C893	Constitutive	Enhancers	chr13	102433994	102434420	0	0	0	intergenic	102433995	102434420	+	OUT	-22000
C894	Induced	Enhancers	chr13	103473094	103473478	-	0	0	uc007rrx.1	103483637	103494342	+	promoter	-10350
C895	Induced	Enhancers	chr13	103478179	103478867	-	0	0	uc007rrx.1	103483637	103494342	+	promoter	-5113
C896	Constitutive	Enhancers	chr13	103479187	103479849	0	0	0	uc007rrx.1	103483637	103494342	+	promoter	-4118
C897	Induced	Promoters	chr13	105400348	105401318	-	0	0	intergenic	105400349	105401318	+	OUT	-22000
C898	Repressed	Enhancers	chr13	106090057	106090438	0	0	0	uc007rtr.1	105920654	106084565	-	promoter	-5683
C899	Repressed	Enhancers	chr13	106100596	106101102	0	0	0	uc007rtr.1	105920654	106084565	-	promoter	-16284
C900	Constitutive	Promoters	chr13	107958611	107959116	0	0	0	intergenic	107958612	107959116	+	OUT	-22000
C901	Repressed	Enhancers	chr13	108689796	108690276	0	0	0	uc007ruq.1	108515904	108679672	-	promoter	-10364
C902	Repressed	Enhancers	chr13	108692998	108694947	0	0	0	uc007ruq.1	108515904	108679672	-	promoter	-14301
C903	Repressed	Enhancers	chr13	108734916	108736840	0	0	0	intergenic	108734917	108736840	+	OUT	-22000
C904	Repressed	Enhancers	chr13	108744252	108745245	0	0	0	intergenic	108744253	108745245	+	OUT	-22000
C905	Repressed	Enhancers	chr13	109087491	109087794	0	0	0	uc007rvc.1	109106530	109179751	+	promoter	-18887
C906	Repressed	Promoters	chr13	109288668	109288960	0	0	0	intergenic	109288669	109288960	+	OUT	-22000
C907	Repressed	Enhancers	chr13	111692663	111693740	0	0	0	intergenic	111692664	111693740	+	OUT	-22000
C908	Repressed	Enhancers	chr13	111732549	111732788	0	0	0	intergenic	111732550	111732788	+	OUT	-22000
C909	Induced	Promoters	chr13	112445617	112446033	-	0	0	intergenic	112445618	112446033	+	OUT	-22000
C910	Constitutive	Promoters	chr13	112674226	112674657	1	0	0	intergenic	112674227	112674657	+	OUT	-22000
C911	Repressed	Enhancers	chr13	112685244	112686672	0	0	0	intergenic	112685245	112686672	+	OUT	-22000
C912	Repressed	Enhancers	chr13	112726060	112726659	0	0	0	intergenic	112726061	112726659	+	OUT	-22000
C913	Repressed	Enhancers	chr13	112770336	112770641	0	0	0	intergenic	112770337	112770641	+	OUT	-22000
C914	Constitutive	Enhancers	chr13	112906157	112906472	0	0	0	intergenic	112906158	112906472	+	OUT	-22000
C915	Repressed	Enhancers	chr13	113228314	113231300	0	0	0	intergenic	113228315	113231300	+	OUT	-22000
C916	Constitutive	Enhancers	chr13	113541958	113542319	0	0	0	intergenic	113541959	113542319	+	OUT	-22000
C917	Induced	Enhancers	chr13	114060207	114060425	-	0	0	intergenic	114060208	114060425	+	OUT	-22000
C918	Repressed	Enhancers	chr13	114208272	114208624	0	0	0	intergenic	114208273	114208624	+	OUT	-22000
C919	Repressed	Enhancers	chr13	114226609	114226868	0	0	0	intergenic	114226610	114226868	+	OUT	-22000
C920	Repressed	Enhancers	chr13	114305251	114305612	0	0	0	intergenic	114305252	114305612	+	OUT	-22000
C921	Constitutive	Enhancers	chr13	114426149	114426647	0	0	0	uc007rxg.1	114382390	114408772	-	promoter	-17626
C922	Constitutive	Enhancers	chr13	117822289	117823327	0	0	0	uc007ryk.1	117643630	117814323	-	promoter	-8485
C923	Repressed	Enhancers	chr14	14813794	14814194	1	0	0	intergenic	14813795	14814194	+	OUT	-22000
C924	Induced	Promoters	chr14	15126961	15127728	-	0	0	intergenic	15126962	15127728	+	OUT	-22000
C925	Induced	Promoters	chr14	15465524	15466568	-	0	0	intergenic	15465525	15466568	+	OUT	-22000
C926	Constitutive	Enhancers	chr14	15472599	15473042	0	0	0	intergenic	15472600	15473042	+	OUT	-22000
C927	Repressed	Enhancers	chr14	20805629	20806369	0	0	0	uc007siw.1	20691780	20796471	-	promoter	-9528
C928	Repressed	Enhancers	chr14	21648638	21649493	0	0	0	uc007skx.1	21655928	21662610	+	promoter	-6862
C929	Repressed	Enhancers	chr14	22630512	22630781	0	0	0	intergenic	22630513	22630781	+	OUT	-22000
C930	Repressed	Enhancers	chr14	22632169	22633556	0	0	0	uc007sls.1	22650782	22665101	+	promoter	-17919
C931	Constitutive	Enhancers	chr14	22640301	22640677	0	0	0	uc007sls.1	22650782	22665101	+	promoter	-10292
C932	Repressed	Enhancers	chr14	22641922	22642798	0	0	0	uc007sls.1	22650782	22665101	+	promoter	-8421
C933	Constitutive	Promoters	chr14	22812919	22813575	1	0	0	uc007slv.1	22803183	22808823	-	promoter	-4424
C934	Repressed	Enhancers	chr14	22818998	22819261	0	0	0	uc007slv.1	22803183	22808823	-	promoter	-10307
C935	Repressed	Promoters	chr14	25598440	25599327	0	0	0	intergenic	25598441	25599327	+	OUT	-22000
C936	Repressed	Promoters	chr14	27807456	27807951	0	0	0	uc007stj.1	27813547	27815511	+	promoter	-5843
C937	Repressed	Enhancers	chr14	30763885	30764231	0	0	0	uc007sul.1	30781565	30788260	+	promoter	-17506
C938	Induced	Enhancers	chr14	31447262	31448968	-	0	0	uc007svh.1	31408554	31439394	-	promoter	-8721
C939	Repressed	Enhancers	chr14	32497492	32497721	0	0	0	intergenic	32497493	32497721	+	OUT	-22000
C940	Repressed	Enhancers	chr14	33511369	33511693	0	0	0	uc007szg.1	33476121	33498440	-	promoter	-13091
C941	Repressed	Promoters	chr14	33597119	33597749	0	0	0	uc007szh.1	33599148	33631154	+	promoter	-1713
C942	Repressed	Enhancers	chr14	34007119	34007470	0	0	0	intergenic	34007120	34007470	+	OUT	-22000
C943	Repressed	Enhancers	chr14	34017034	34017424	0	0	0	uc007szm.1	34030008	34183119	+	promoter	-12778
C944	Constitutive	Promoters	chr14	35475041	35475348	0	0	0	uc007tbi.1	35487113	35559403	+	promoter	-11918
C945	Repressed	Enhancers	chr14	45669272	45670376	0	0	0	intergenic	45669273	45670376	+	OUT	-22000
C946	Repressed	Enhancers	chr14	45945102	45945515	0	0	0	uc007tgn.1	45949498	45968746	+	promoter	-4189
C947	Repressed	Enhancers	chr14	47970820	47972580	0	0	0	intergenic	47970821	47972580	+	OUT	-22000
C948	Repressed	Enhancers	chr14	47977779	47982157	0	0	0	uc007tia.1	47993592	48005835	+	promoter	-13623
C949	Constitutive	Enhancers	chr14	48064644	48065027	0	0	0	intergenic	48064645	48065027	+	OUT	-22000
C950	Repressed	Enhancers	chr14	51512762	51512982	0	0	0	intergenic	51512763	51512982	+	OUT	-22000
C951	Induced	Promoters	chr14	51703623	51704009	-	0	0	uc007tml.1	51710870	51721680	+	promoter	-7053
C952	Repressed	Enhancers	chr14	51819736	51819985	0	0	0	uc007tmv.1	51823364	51823831	+	promoter	-3503
C953	Repressed	Enhancers	chr14	52560932	52562189	0	0	0	uc007tnn.1	52541893	52542355	-	promoter	-19206
C954	Repressed	Promoters	chr14	52726296	52726882	0	0	0	uc007tob.1	52694473	52723657	-	promoter	-2932
C955	Constitutive	Enhancers	chr14	56265392	56266332	2	0	0	uc007tzx.1	56269018	56271368	+	promoter	-3155
C956	Repressed	Promoters	chr14	56343361	56343730	0	0	0	uc007uam.1	56334713	56341094	-	promoter	-2452
C957	Constitutive	Promoters	chr14	56433731	56434541	0	0	0	uc007uax.1	56443844	56452780	+	promoter	-9707
C958	Induced	Enhancers	chr14	58940139	58941685	-	0	0	intergenic	58940140	58941685	+	OUT	-22000
C959	Induced	Promoters	chr14	59878084	59879287	-	0	0	intergenic	59878085	59879287	+	OUT	-22000
C960	Repressed	Enhancers	chr14	61062217	61063275	0	0	0	intergenic	61062218	61063275	+	OUT	-22000
C961	Repressed	Enhancers	chr14	62137451	62138317	0	0	0	intergenic	62137452	62138317	+	OUT	-22000
C962	Repressed	Enhancers	chr14	62376049	62376286	0	0	0	intergenic	62376050	62376286	+	OUT	-22000
C963	Repressed	Enhancers	chr14	62480045	62480405	0	0	0	uc007ugj.1	62464203	62465535	-	promoter	-14690
C964	Repressed	Promoters	chr14	62589898	62590922	0	0	0	intergenic	62589899	62590922	+	OUT	-22000
C965	Repressed	Enhancers	chr14	63695228	63699522	0	0	0	intergenic	63695229	63699522	+	OUT	-22000
C966	Repressed	Enhancers	chr14	63721425	63721703	0	0	0	uc007uhh.1	63741301	63764758	+	promoter	-19736
C967	Repressed	Promoters	chr14	65258314	65258637	0	0	0	uc007uim.1	65271367	65425133	+	promoter	-12891
C968	Repressed	Enhancers	chr14	65719127	65721220	0	0	0	uc007uiy.1	65694420	65716908	-	promoter	-3266
C969	Repressed	Enhancers	chr14	65731525	65732788	2	0	0	uc007uiy.1	65694420	65716908	-	promoter	-15249
C970	Constitutive	Promoters	chr14	65768475	65768792	1	0	0	intergenic	65768476	65768792	+	OUT	-22000
C971	Repressed	Enhancers	chr14	66959550	66959928	0	0	0	uc007ukf.1	66963211	66980517	+	promoter	-3471
C972	Repressed	Enhancers	chr14	67715659	67717247	0	0	0	intergenic	67715660	67717247	+	OUT	-22000
C973	Repressed	Enhancers	chr14	68660562	68660787	0	0	0	intergenic	68660563	68660787	+	OUT	-22000
C974	Repressed	Promoters	chr14	68666489	68666923	0	0	0	intergenic	68666490	68666923	+	OUT	-22000
C975	Constitutive	Promoters	chr14	68668743	68669485	0	0	0	intergenic	68668744	68669485	+	OUT	-22000
C976	Repressed	Enhancers	chr14	71191008	71191491	0	0	0	intergenic	71191009	71191491	+	OUT	-22000
C977	Constitutive	Enhancers	chr14	71198320	71198797	0	0	0	intergenic	71198321	71198797	+	OUT	-22000
C978	Induced	Enhancers	chr14	73262260	73262462	-	0	0	intergenic	73262261	73262462	+	OUT	-22000
C979	Induced	Enhancers	chr14	73458741	73459028	-	0	0	uc007upi.1	73428934	73448879	-	promoter	-10006
C980	Repressed	Enhancers	chr14	73733884	73734053	0	0	0	uc007upp.1	73595308	73725547	-	promoter	-8422
C981	Repressed	Enhancers	chr14	73833397	73833747	0	0	0	intergenic	73833398	73833747	+	OUT	-22000
C982	Repressed	Enhancers	chr14	73841857	73842479	0	0	0	intergenic	73841858	73842479	+	OUT	-22000
C983	Repressed	Enhancers	chr14	74238851	74239218	0	0	0	intergenic	74238852	74239218	+	OUT	-22000
C984	Induced	Enhancers	chr14	75408210	75408415	-	0	0	uc007uqk.1	75415833	75452339	+	promoter	-7520
C985	Repressed	Enhancers	chr14	75465755	75465974	0	0	0	intergenic	75465756	75465974	+	OUT	-22000
C986	Repressed	Promoters	chr14	75467795	75469188	0	0	0	intergenic	75467796	75469188	+	OUT	-22000
C987	Induced	Enhancers	chr14	75915859	75916676	-	0	0	intergenic	75915860	75916676	+	OUT	-22000
C988	Repressed	Enhancers	chr14	76228713	76229099	0	0	0	uc007uqz.1	76245137	76248105	+	promoter	-16230
C989	Repressed	Promoters	chr14	76231756	76232192	0	0	0	uc007uqz.1	76245137	76248105	+	promoter	-13162
C990	Repressed	Enhancers	chr14	76595279	76595493	0	0	0	intergenic	76595280	76595493	+	OUT	-22000
C991	Induced	Enhancers	chr14	79163907	79164100	-	0	0	intergenic	79163908	79164100	+	OUT	-22000
C992	Repressed	Enhancers	chr14	79841168	79841556	0	0	0	uc007usz.1	79851641	79854623	+	promoter	-10278
C993	Induced	Promoters	chr14	87967674	87967948	-	0	0	intergenic	87967675	87967948	+	OUT	-22000
C994	Constitutive	Enhancers	chr14	103205279	103206154	0	0	1	intergenic	103205280	103206154	+	OUT	-22000
C995	Repressed	Enhancers	chr14	103234173	103234413	0	0	0	intergenic	103234174	103234413	+	OUT	-22000
C996	Repressed	Enhancers	chr14	103282755	103282925	0	0	0	intergenic	103282756	103282925	+	OUT	-22000
C997	Repressed	Enhancers	chr14	103306093	103306496	0	0	0	intergenic	103306094	103306496	+	OUT	-22000
C998	Induced	Enhancers	chr14	103411801	103415764	-	0	0	intergenic	103411802	103415764	+	OUT	-22000
C999	Induced	Enhancers	chr14	103416766	103417314	-	0	0	intergenic	103416767	103417314	+	OUT	-22000
C1000	Induced	Enhancers	chr14	103419190	103420514	-	0	0	intergenic	103419191	103420514	+	OUT	-22000
C1001	Constitutive	Enhancers	chr14	103431845	103434138	2	1	0	uc007uwf.1	103446230	103455790	+	promoter	-13238
C1002	Induced	Enhancers	chr14	103435454	103437224	-	0	0	uc007uwf.1	103446230	103455790	+	promoter	-9890
C1003	Constitutive	Promoters	chr14	103748620	103749097	0	0	0	uc007uwl.1	103512627	103746017	-	promoter	-2842
C1004	Repressed	Promoters	chr14	104118474	104118825	0	0	0	uc007uwu.1	104092199	104098659	-	promoter	-19991
C1005	Repressed	Promoters	chr14	106131450	106131823	0	0	0	intergenic	106131451	106131823	+	OUT	-22000
C1006	Repressed	Promoters	chr14	106321591	106322576	0	0	0	intergenic	106321592	106322576	+	OUT	-22000
C1007	Induced	Promoters	chr14	106443790	106443974	-	0	0	intergenic	106443791	106443974	+	OUT	-22000
C1008	Induced	Enhancers	chr14	106593471	106593713	-	0	1	intergenic	106593472	106593713	+	OUT	-22000
C1009	Repressed	Promoters	chr14	115347650	115347827	0	0	0	uc007uyg.1	115339448	115345170	-	promoter	-2569
C1010	Induced	Promoters	chr14	115440547	115441623	-	0	0	intergenic	115440548	115441623	+	OUT	-22000
C1011	Constitutive	Promoters	chr14	118488278	118488718	0	0	0	intergenic	118488279	118488718	+	OUT	-22000
C1012	Constitutive	Enhancers	chr14	118497569	118497903	0	0	0	intergenic	118497570	118497903	+	OUT	-22000
C1013	Induced	Enhancers	chr14	120295331	120295642	-	0	0	intergenic	120295332	120295642	+	OUT	-22000
C1014	Constitutive	Enhancers	chr14	120662254	120662797	0	0	0	uc007uzq.1	120674890	120792498	+	promoter	-12364
C1015	Constitutive	Enhancers	chr14	121161210	121162395	0	0	0	intergenic	121161211	121162395	+	OUT	-22000
C1016	Induced	Enhancers	chr14	121231215	121231447	-	0	0	intergenic	121231216	121231447	+	OUT	-22000
C1017	Repressed	Enhancers	chr15	3184042	3184449	0	0	0	intergenic	3184043	3184449	+	OUT	-22000
C1018	Induced	Promoters	chr15	4766687	4767432	-	0	0	intergenic	4766688	4767432	+	OUT	-22000
C1019	Induced	Promoters	chr15	4771242	4772176	-	0	0	intergenic	4771243	4772176	+	OUT	-22000
C1020	Induced	Enhancers	chr15	5212977	5213245	-	0	0	uc007vcz.1	5183864	5194172	-	promoter	-18939
C1021	Repressed	Enhancers	chr15	6209419	6211115	0	0	0	intergenic	6209420	6211115	+	OUT	-22000
C1022	Constitutive	Promoters	chr15	6472718	6473445	3	0	0	intergenic	6472719	6473445	+	OUT	-22000
C1023	Constitutive	Enhancers	chr15	6490067	6490513	2	0	0	intergenic	6490068	6490513	+	OUT	-22000
C1024	Repressed	Enhancers	chr15	6491795	6492100	0	0	0	intergenic	6491796	6492100	+	OUT	-22000
C1025	Repressed	Enhancers	chr15	6504562	6508004	6	0	0	intergenic	6504563	6508004	+	OUT	-22000
C1026	Constitutive	Enhancers	chr15	6513213	6514087	0	0	0	uc007vdi.1	6529870	6570608	+	promoter	-16219
C1027	Repressed	Enhancers	chr15	6514316	6515482	2	1	0	uc007vdi.1	6529870	6570608	+	promoter	-14970
C1028	Constitutive	Promoters	chr15	6517308	6522892	5	0	0	uc007vdi.1	6529870	6570608	+	promoter	-9769
C1029	Induced	Promoters	chr15	6655519	6655854	-	0	0	uc007vdn.1	6658382	6708615	+	promoter	-2695
C1030	Repressed	Enhancers	chr15	7035251	7035560	0	0	0	intergenic	7035252	7035560	+	OUT	-22000
C1031	Repressed	Enhancers	chr15	7042466	7042798	0	0	0	intergenic	7042467	7042798	+	OUT	-22000
C1032	Repressed	Promoters	chr15	8461906	8462369	0	0	0	uc007vew.1	8478950	8482788	+	promoter	-16812
C1033	Induced	Promoters	chr15	8519101	8519607	-	0	0	intergenic	8519102	8519607	+	OUT	-22000
C1034	Repressed	Enhancers	chr15	11645893	11646379	0	0	0	intergenic	11645894	11646379	+	OUT	-22000
C1035	Repressed	Enhancers	chr15	12236161	12236787	0	0	0	uc007vhn.1	12251250	12273064	+	promoter	-14775
C1036	Induced	Promoters	chr15	15019946	15020250	-	0	0	intergenic	15019947	15020250	+	OUT	-22000
C1037	Repressed	Enhancers	chr15	19787208	19787641	0	0	0	intergenic	19787209	19787641	+	OUT	-22000
C1038	Induced	Enhancers	chr15	25201531	25201891	-	0	0	intergenic	25201532	25201891	+	OUT	-22000
C1039	Repressed	Enhancers	chr15	25758095	25760849	0	0	0	uc007vjf.1	25773018	25903442	+	promoter	-13545
C1040	Repressed	Enhancers	chr15	27617844	27618219	0	0	0	uc007vjs.1	27586024	27611253	-	promoter	-6779
C1041	Repressed	Enhancers	chr15	27631860	27633792	0	0	0	intergenic	27631861	27633792	+	OUT	-22000
C1042	Repressed	Enhancers	chr15	27638914	27639238	0	0	0	intergenic	27638915	27639238	+	OUT	-22000
C1043	Induced	Promoters	chr15	28088723	28089268	-	0	0	intergenic	28088724	28089268	+	OUT	-22000
C1044	Repressed	Enhancers	chr15	31347789	31348452	0	0	0	intergenic	31347790	31348452	+	OUT	-22000
C1045	Induced	Enhancers	chr15	33973539	33973961	-	0	0	intergenic	33973540	33973961	+	OUT	-22000
C1046	Induced	Enhancers	chr15	33975326	33977058	-	1	0	intergenic	33975327	33977058	+	OUT	-22000
C1047	Induced	Enhancers	chr15	33988920	33989164	-	0	0	intergenic	33988921	33989164	+	OUT	-22000
C1048	Induced	Enhancers	chr15	33996838	33997836	-	0	0	uc007vlf.1	34012473	34032746	+	promoter	-15135
C1049	Induced	Enhancers	chr15	34003180	34003316	-	0	0	uc007vlf.1	34012473	34032746	+	promoter	-9224
C1050	Repressed	Enhancers	chr15	36264387	36264605	0	0	0	intergenic	36264388	36264605	+	OUT	-22000
C1051	Repressed	Promoters	chr15	36508258	36508538	0	0	0	intergenic	36508259	36508538	+	OUT	-22000
C1052	Induced	Enhancers	chr15	36577742	36577962	-	0	0	intergenic	36577743	36577962	+	OUT	-22000
C1053	Induced	Promoters	chr15	36579540	36579915	-	0	0	intergenic	36579541	36579915	+	OUT	-22000
C1054	Induced	Enhancers	chr15	36645489	36645804	-	0	0	intergenic	36645490	36645804	+	OUT	-22000
C1055	Repressed	Promoters	chr15	38128693	38128963	0	0	0	uc007vnq.1	38148957	38156394	+	promoter	-20128
C1056	Induced	Enhancers	chr15	38174568	38174848	-	0	0	intergenic	38174569	38174848	+	OUT	-22000
C1057	Repressed	Enhancers	chr15	38301405	38301744	0	0	0	intergenic	38301406	38301744	+	OUT	-22000
C1058	Repressed	Promoters	chr15	38314402	38315250	0	0	0	intergenic	38314403	38315250	+	OUT	-22000
C1059	Induced	Enhancers	chr15	38387799	38388448	-	0	0	intergenic	38387800	38388448	+	OUT	-22000
C1060	Induced	Enhancers	chr15	38398042	38398732	-	0	0	intergenic	38398043	38398732	+	OUT	-22000
C1061	Induced	Promoters	chr15	38403002	38403732	-	0	0	intergenic	38403003	38403732	+	OUT	-22000
C1062	Repressed	Enhancers	chr15	38531843	38532174	0	0	0	intergenic	38531844	38532174	+	OUT	-22000
C1063	Repressed	Enhancers	chr15	38573888	38574971	0	0	0	uc007vnv.1	38591708	38621638	+	promoter	-17278
C1064	Repressed	Enhancers	chr15	38580105	38581079	0	0	0	uc007vnv.1	38591708	38621638	+	promoter	-11115
C1065	Repressed	Enhancers	chr15	39788753	39790204	0	0	0	uc007voo.1	39794194	39798570	+	promoter	-4715
C1066	Repressed	Enhancers	chr15	50192970	50193209	0	0	0	intergenic	50192971	50193209	+	OUT	-22000
C1067	Repressed	Enhancers	chr15	50915482	50915682	0	0	0	intergenic	50915483	50915682	+	OUT	-22000
C1068	Repressed	Promoters	chr15	53231626	53232324	0	0	0	intergenic	53231627	53232324	+	OUT	-22000
C1069	Repressed	Enhancers	chr15	57738362	57738679	0	0	0	uc007vss.1	57743753	57790957	+	promoter	-5232
C1070	Repressed	Enhancers	chr15	58921105	58921659	1	0	0	uc007vty.1	58774801	58913544	-	promoter	-7838
C1071	Constitutive	Enhancers	chr15	58977154	58977610	0	0	0	intergenic	58977155	58977610	+	OUT	-22000
C1072	Repressed	Enhancers	chr15	58990053	58990465	0	0	0	intergenic	58990054	58990465	+	OUT	-22000
C1073	Repressed	Enhancers	chr15	59033536	59035246	0	0	0	intergenic	59033537	59035246	+	OUT	-22000
C1074	Repressed	Enhancers	chr15	59552809	59553288	0	0	0	intergenic	59552810	59553288	+	OUT	-22000
C1075	Repressed	Enhancers	chr15	59559779	59560888	0	0	0	intergenic	59559780	59560888	+	OUT	-22000
C1076	Repressed	Enhancers	chr15	59591158	59592034	0	0	0	intergenic	59591159	59592034	+	OUT	-22000
C1077	Repressed	Enhancers	chr15	59627269	59627548	0	0	0	uc007vxy.1	59619971	59626514	-	promoter	-895
C1078	Repressed	Enhancers	chr15	59696032	59696780	0	0	0	intergenic	59696033	59696780	+	OUT	-22000
C1079	Repressed	Enhancers	chr15	59718977	59719935	0	0	0	intergenic	59718978	59719935	+	OUT	-22000
C1080	Repressed	Enhancers	chr15	61834279	61834742	0	0	0	intergenic	61834280	61834742	+	OUT	-22000
C1081	Repressed	Enhancers	chr15	62221096	62221549	0	0	0	intergenic	62221097	62221549	+	OUT	-22000
C1082	Repressed	Enhancers	chr15	62224098	62225176	0	0	0	intergenic	62224099	62225176	+	OUT	-22000
C1083	Repressed	Enhancers	chr15	63445641	63446493	0	0	0	intergenic	63445642	63446493	+	OUT	-22000
C1084	Repressed	Enhancers	chr15	63448072	63448963	0	0	0	intergenic	63448073	63448963	+	OUT	-22000
C1085	Repressed	Enhancers	chr15	63456580	63456843	0	0	0	intergenic	63456581	63456843	+	OUT	-22000
C1086	Repressed	Enhancers	chr15	64373689	64374184	0	0	0	intergenic	64373690	64374184	+	OUT	-22000
C1087	Constitutive	Promoters	chr15	66870903	66871613	0	0	0	intergenic	66870904	66871613	+	OUT	-22000
C1088	Repressed	Enhancers	chr15	67176885	67177282	0	0	0	intergenic	67176886	67177282	+	OUT	-22000
C1089	Constitutive	Enhancers	chr15	67612617	67613404	0	0	0	intergenic	67612618	67613404	+	OUT	-22000
C1090	Constitutive	Promoters	chr15	68151728	68152252	0	0	0	intergenic	68151729	68152252	+	OUT	-22000
C1091	Induced	Promoters	chr15	68192755	68195309	-	0	0	intergenic	68192756	68195309	+	OUT	-22000
C1092	Constitutive	Promoters	chr15	72898153	72898501	0	0	0	uc007wbm.1	72420049	72891634	-	promoter	-6693
C1093	Repressed	Enhancers	chr15	73467890	73468111	1	0	0	uc007wch.1	73411986	73455174	-	promoter	-12827
C1094	Constitutive	Promoters	chr15	73475869	73476519	1	0	0	intergenic	73475870	73476519	+	OUT	-22000
C1095	Induced	Enhancers	chr15	74748991	74749723	-	0	0	intergenic	74748992	74749723	+	OUT	-22000
C1096	Induced	Enhancers	chr15	74751198	74754307	-	0	0	intergenic	74751199	74754307	+	OUT	-22000
C1097	Induced	Enhancers	chr15	74756981	74758758	-	0	0	intergenic	74756982	74758758	+	OUT	-22000
C1098	Induced	Enhancers	chr15	74760581	74764369	-	1	0	intergenic	74760582	74764369	+	OUT	-22000
C1099	Constitutive	Promoters	chr15	74916457	74917529	0	0	0	intergenic	74916458	74917529	+	OUT	-22000
C1100	Repressed	Enhancers	chr15	75687130	75688311	0	0	0	uc007whh.1	75692768	75697834	+	promoter	-5047
C1101	Repressed	Enhancers	chr15	77705160	77705500	0	0	0	intergenic	77705161	77705500	+	OUT	-22000
C1102	Repressed	Enhancers	chr15	78418446	78420213	0	0	0	uc007wpq.1	78404840	78412019	-	promoter	-7311
C1103	Repressed	Enhancers	chr15	78421346	78422606	0	0	0	uc007wpr.1	78427476	78442927	+	promoter	-5499
C1104	Repressed	Enhancers	chr15	78646215	78646551	0	0	0	uc007wrk.1	78605565	78633472	-	promoter	-12911
C1105	Repressed	Promoters	chr15	78692653	78692864	0	0	0	uc007wrm.1	78681291	78685959	-	promoter	-6800
C1106	Constitutive	Enhancers	chr15	78694269	78694785	0	0	0	uc007wrm.1	78681291	78685959	-	promoter	-8568
C1107	Induced	Enhancers	chr15	79579567	79580088	-	0	0	uc007wug.1	79554500	79572960	-	promoter	-6868
C1108	Constitutive	Enhancers	chr15	79704467	79704835	0	0	0	uc007wur.1	79722887	79737582	+	promoter	-18235
C1109	Constitutive	Enhancers	chr15	79854989	79856383	0	0	0	uc007wuz.1	79826305	79845238	-	promoter	-10448
C1110	Repressed	Enhancers	chr15	79860776	79861604	0	0	0	uc007wuz.1	79826305	79845238	-	promoter	-15952
C1111	Induced	Promoters	chr15	81341862	81342943	-	0	0	intergenic	81341863	81342943	+	OUT	-22000
C1112	Induced	Enhancers	chr15	81344244	81345207	-	1	0	intergenic	81344245	81345207	+	OUT	-22000
C1113	Constitutive	Promoters	chr15	81351909	81355026	0	0	0	intergenic	81351910	81355026	+	OUT	-22000
C1114	Induced	Enhancers	chr15	81363688	81366969	-	0	0	intergenic	81363689	81366969	+	OUT	-22000
C1115	Constitutive	Promoters	chr15	81399045	81399324	0	0	0	uc007wwr.1	81416643	81454648	+	promoter	-17458
C1116	Induced	Enhancers	chr15	83046406	83046769	-	0	0	intergenic	83046407	83046769	+	OUT	-22000
C1117	Repressed	Enhancers	chr15	84824947	84825749	0	0	0	uc007xcr.1	84776149	84818401	-	promoter	-6947
C1118	Constitutive	Promoters	chr15	85464596	85465962	0	0	0	uc007xdi.1	85476512	85498105	+	promoter	-11232
C1119	Repressed	Enhancers	chr15	86032826	86035234	1	0	0	uc007xea.1	86044888	86328933	+	promoter	-10857
C1120	Repressed	Enhancers	chr15	88320556	88321302	0	0	0	intergenic	88320557	88321302	+	OUT	-22000
C1121	Induced	Promoters	chr15	88668074	88668276	-	0	0	uc007xen.1	88635674	88649710	-	promoter	-18465
C1122	Repressed	Enhancers	chr15	93171105	93171846	0	0	0	uc007xis.1	93114328	93167339	-	promoter	-4137
C1123	Constitutive	Enhancers	chr15	94421803	94422432	0	0	0	uc007xjl.1	94408378	94420255	-	promoter	-1863
C1124	Repressed	Promoters	chr15	96305031	96305440	0	0	0	uc007xkf.1	96242128	96291274	-	promoter	-13962
C1125	Repressed	Enhancers	chr15	96305969	96306291	0	0	0	uc007xkf.1	96242128	96291274	-	promoter	-14856
C1126	Repressed	Enhancers	chr15	96485678	96486280	0	1	0	uc007xkj.1	96405105	96473344	-	promoter	-12635
C1127	Constitutive	Promoters	chr15	96539630	96541023	1	0	0	uc007xkm.1	96517822	96530129	-	promoter	-10198
C1128	Repressed	Enhancers	chr15	96559607	96559840	0	0	0	intergenic	96559608	96559840	+	OUT	-22000
C1129	Repressed	Enhancers	chr15	96587893	96588627	0	0	0	intergenic	96587894	96588627	+	OUT	-22000
C1130	Induced	Promoters	chr15	97043457	97043873	-	0	0	intergenic	97043458	97043873	+	OUT	-22000
C1131	Constitutive	Promoters	chr15	97494363	97494704	0	0	0	intergenic	97494364	97494704	+	OUT	-22000
C1132	Repressed	Enhancers	chr15	98314393	98315310	0	0	0	uc007xmo.1	98310830	98313114	-	promoter	-1738
C1133	Constitutive	Enhancers	chr15	98514262	98514661	0	0	0	uc007xnh.1	98493851	98507892	-	promoter	-6570
C1134	Induced	Promoters	chr15	98767257	98768094	-	0	0	uc007xoj.1	98761861	98764821	-	promoter	-2855
C1135	Constitutive	Promoters	chr15	99306983	99307181	0	0	0	uc007xpo.1	99300514	99305160	-	promoter	-1922
C1136	Constitutive	Promoters	chr15	100273916	100274425	0	0	0	uc007xre.1	100239630	100254645	-	promoter	-19526
C1137	Repressed	Enhancers	chr15	100291445	100292579	0	1	0	uc007xrg.1	100299465	100309595	+	promoter	-7452
C1138	Constitutive	Promoters	chr15	100909072	100909676	0	0	0	intergenic	100909073	100909676	+	OUT	-22000
C1139	Constitutive	Enhancers	chr15	101076433	101077338	0	0	0	uc007xsv.1	101097292	101105223	+	promoter	-20406
C1140	Constitutive	Enhancers	chr15	101092712	101093387	0	0	0	uc007xsv.1	101097292	101105223	+	promoter	-4242
C1141	Constitutive	Promoters	chr15	101901568	101901871	0	0	0	uc007xuk.1	101904354	101927604	+	promoter	-2634
C1142	Constitutive	Promoters	chr15	102207312	102207607	0	0	0	uc007xvn.1	102187607	102197399	-	promoter	-10061
C1143	Induced	Promoters	chr15	102229805	102230730	-	0	0	uc007xvo.1	102236746	102266835	+	promoter	-6478
C1144	Induced	Enhancers	chr15	103201088	103201439	-	0	0	uc007xyb.1	103174717	103197194	-	promoter	-4070
C1145	Induced	Enhancers	chr16	3722734	3723651	-	0	0	uc007xym.1	3707217	3718097	-	promoter	-5096
C1146	Induced	Enhancers	chr16	3729899	3730269	-	0	0	uc007xym.1	3707217	3718097	-	promoter	-11987
C1147	Induced	Enhancers	chr16	3732345	3734167	-	0	0	uc007xyn.1	3744130	3750783	+	promoter	-10873
C1148	Constitutive	Promoters	chr16	4003406	4004423	0	0	0	uc007xzg.1	3979122	4001680	-	promoter	-2235
C1149	Constitutive	Promoters	chr16	4586446	4587379	0	0	1	uc007xzw.1	4594712	4615957	+	promoter	-7799
C1150	Induced	Enhancers	chr16	5429645	5432336	-	0	0	intergenic	5429646	5432336	+	OUT	-22000
C1151	Induced	Enhancers	chr16	10451942	10453158	-	0	0	uc007ydp.1	10420651	10447443	-	promoter	-5107
C1152	Repressed	Enhancers	chr16	10999585	11001245	0	0	0	uc007yen.1	10959366	10993182	-	promoter	-7233
C1153	Repressed	Enhancers	chr16	11004677	11007207	0	0	0	uc007yeo.1	11008990	11015277	+	promoter	-3047
C1154	Constitutive	Promoters	chr16	11177510	11177881	1	0	0	uc007yez.1	11136695	11176382	-	promoter	-1314
C1155	Repressed	Enhancers	chr16	11343279	11343863	2	0	0	intergenic	11343280	11343863	+	OUT	-22000
C1156	Repressed	Enhancers	chr16	13239077	13240069	0	0	0	uc007yfy.1	13256591	13326664	+	promoter	-17017
C1157	Repressed	Enhancers	chr16	13246341	13246549	0	0	0	uc007yfy.1	13256591	13326664	+	promoter	-10145
C1158	Induced	Promoters	chr16	13754465	13755289	-	0	0	intergenic	13754466	13755289	+	OUT	-22000
C1159	Repressed	Enhancers	chr16	14352857	14353145	0	0	0	uc007yhj.1	14361652	14474967	+	promoter	-8650
C1160	Repressed	Enhancers	chr16	14358520	14359450	0	0	0	uc007yhj.1	14361652	14474967	+	promoter	-2666
C1161	Constitutive	Enhancers	chr16	18687119	18687486	0	0	0	intergenic	18687120	18687486	+	OUT	-22000
C1162	Induced	Promoters	chr16	18733053	18733619	-	0	0	intergenic	18733054	18733619	+	OUT	-22000
C1163	Induced	Enhancers	chr16	19912788	19913080	-	0	0	intergenic	19912789	19913080	+	OUT	-22000
C1164	Repressed	Promoters	chr16	21310746	21311440	0	0	0	uc007yri.1	21247571	21296945	-	promoter	-14148
C1165	Constitutive	Promoters	chr16	21332973	21334066	1	0	0	intergenic	21332974	21334066	+	OUT	-22000
C1166	Repressed	Enhancers	chr16	21339578	21339785	0	0	0	intergenic	21339579	21339785	+	OUT	-22000
C1167	Repressed	Enhancers	chr16	21382404	21382631	0	0	0	intergenic	21382405	21382631	+	OUT	-22000
C1168	Constitutive	Enhancers	chr16	22358813	22359288	0	0	0	intergenic	22358814	22359288	+	OUT	-22000
C1169	Repressed	Enhancers	chr16	22444875	22445231	0	0	0	uc007yse.1	22381385	22439643	-	promoter	-5410
C1170	Induced	Promoters	chr16	23897607	23898457	-	0	0	uc007ytx.1	23889666	23890930	-	promoter	-7102
C1171	Induced	Enhancers	chr16	23992273	23994896	-	0	0	uc007ytz.1	23965137	23988698	-	promoter	-4887
C1172	Induced	Enhancers	chr16	23999347	24000717	-	0	0	uc007ytz.1	23965137	23988698	-	promoter	-11334
C1173	Induced	Enhancers	chr16	24027373	24028288	-	0	0	intergenic	24027374	24028288	+	OUT	-22000
C1174	Repressed	Enhancers	chr16	24151672	24152263	0	0	0	intergenic	24151673	24152263	+	OUT	-22000
C1175	Constitutive	Enhancers	chr16	25011278	25013522	0	0	0	intergenic	25011279	25013522	+	OUT	-22000
C1176	Induced	Enhancers	chr16	25016250	25018363	-	0	0	intergenic	25016251	25018363	+	OUT	-22000
C1177	Induced	Enhancers	chr16	25022623	25028237	-	0	0	intergenic	25022624	25028237	+	OUT	-22000
C1178	Constitutive	Enhancers	chr16	25040640	25041787	0	0	0	uc007yuk.1	25059724	25069144	+	promoter	-18510
C1179	Constitutive	Enhancers	chr16	25046957	25051831	5	0	0	uc007yuk.1	25059724	25069144	+	promoter	-10329
C1180	Induced	Enhancers	chr16	28972631	28972812	-	0	0	intergenic	28972632	28972812	+	OUT	-22000
C1181	Induced	Promoters	chr16	30008794	30009308	-	0	0	intergenic	30008795	30009308	+	OUT	-22000
C1182	Repressed	Enhancers	chr16	30184801	30188546	1	0	0	intergenic	30184802	30188546	+	OUT	-22000
C1183	Repressed	Enhancers	chr16	30776177	30777004	0	0	0	intergenic	30776178	30777004	+	OUT	-22000
C1184	Repressed	Enhancers	chr16	30787611	30787870	0	0	0	intergenic	30787612	30787870	+	OUT	-22000
C1185	Repressed	Enhancers	chr16	30789222	30789631	0	0	0	intergenic	30789223	30789631	+	OUT	-22000
C1186	Induced	Enhancers	chr16	31210154	31210340	-	0	0	uc007yxb.1	31092498	31201324	-	promoter	-8923
C1187	Constitutive	Promoters	chr16	31233781	31234602	0	0	0	intergenic	31233782	31234602	+	OUT	-22000
C1188	Induced	Enhancers	chr16	31235568	31236039	-	0	0	intergenic	31235569	31236039	+	OUT	-22000
C1189	Repressed	Enhancers	chr16	31507032	31507306	0	0	0	intergenic	31507033	31507306	+	OUT	-22000
C1190	Induced	Enhancers	chr16	32124580	32125106	-	0	0	intergenic	32124581	32125106	+	OUT	-22000
C1191	Constitutive	Enhancers	chr16	32129544	32130761	0	0	0	intergenic	32129545	32130761	+	OUT	-22000
C1192	Repressed	Enhancers	chr16	32170823	32172037	0	0	0	uc007yyh.1	32142910	32165562	-	promoter	-5868
C1193	Constitutive	Enhancers	chr16	32176890	32177943	0	0	0	uc007yyk.1	32179885	32187030	+	promoter	-2468
C1194	Constitutive	Enhancers	chr16	32202673	32203010	0	0	0	intergenic	32202674	32203010	+	OUT	-22000
C1195	Repressed	Enhancers	chr16	32324052	32324266	0	0	0	uc007yyp.1	32332342	32360691	+	promoter	-8182
C1196	Repressed	Enhancers	chr16	33178325	33178924	0	0	0	uc007yzy.1	33185156	33243352	+	promoter	-6531
C1197	Induced	Enhancers	chr16	35888214	35888713	-	0	0	uc007zbs.1	35832963	35871586	-	promoter	-16878
C1198	Induced	Enhancers	chr16	35903329	35903663	-	0	0	intergenic	35903330	35903663	+	OUT	-22000
C1199	Induced	Enhancers	chr16	35904704	35904942	-	0	0	intergenic	35904705	35904942	+	OUT	-22000
C1200	Induced	Enhancers	chr16	35906168	35906512	-	0	0	intergenic	35906169	35906512	+	OUT	-22000
C1201	Induced	Enhancers	chr16	36669637	36669928	-	1	0	uc007zcq.1	36603959	36666137	-	promoter	-3646
C1202	Repressed	Enhancers	chr16	42676689	42676991	0	0	0	intergenic	42676690	42676991	+	OUT	-22000
C1203	Repressed	Promoters	chr16	44063250	44063469	0	0	0	intergenic	44063251	44063469	+	OUT	-22000
C1204	Repressed	Enhancers	chr16	45005408	45005655	1	0	0	intergenic	45005409	45005655	+	OUT	-22000
C1205	Induced	Enhancers	chr16	45032973	45033171	-	0	0	intergenic	45032974	45033171	+	OUT	-22000
C1206	Constitutive	Enhancers	chr16	49504167	49504595	0	0	0	intergenic	49504168	49504595	+	OUT	-22000
C1207	Constitutive	Enhancers	chr16	49839581	49840879	0	0	0	uc007zkg.1	49855766	49911796	+	promoter	-15535
C1208	Repressed	Enhancers	chr16	49982275	49982905	0	0	0	intergenic	49982276	49982905	+	OUT	-22000
C1209	Repressed	Enhancers	chr16	50096468	50096934	0	0	0	intergenic	50096469	50096934	+	OUT	-22000
C1210	Repressed	Enhancers	chr16	51929301	51930290	0	0	0	intergenic	51929302	51930290	+	OUT	-22000
C1211	Repressed	Enhancers	chr16	52467297	52470976	0	1	0	uc007zli.1	52251025	52454187	-	promoter	-14950
C1212	Repressed	Enhancers	chr16	52474369	52474584	0	0	0	intergenic	52474370	52474584	+	OUT	-22000
C1213	Repressed	Enhancers	chr16	55555354	55555732	0	0	0	intergenic	55555355	55555732	+	OUT	-22000
C1214	Induced	Enhancers	chr16	55636788	55637309	-	0	0	intergenic	55636789	55637309	+	OUT	-22000
C1215	Induced	Enhancers	chr16	55641160	55641454	-	0	0	intergenic	55641161	55641454	+	OUT	-22000
C1216	Repressed	Enhancers	chr16	55698872	55699158	0	0	0	intergenic	55698873	55699158	+	OUT	-22000
C1217	Constitutive	Enhancers	chr16	55754368	55754857	0	0	0	intergenic	55754369	55754857	+	OUT	-22000
C1218	Induced	Promoters	chr16	59600180	59601134	-	0	0	intergenic	59600181	59601134	+	OUT	-22000
C1219	Induced	Promoters	chr16	64873157	64874068	-	0	0	intergenic	64873158	64874068	+	OUT	-22000
C1220	Constitutive	Enhancers	chr16	64883793	64884060	0	0	0	intergenic	64883794	64884060	+	OUT	-22000
C1221	Repressed	Enhancers	chr16	64884146	64884412	0	0	0	intergenic	64884147	64884412	+	OUT	-22000
C1222	Induced	Enhancers	chr16	65486278	65486415	-	0	0	intergenic	65486279	65486415	+	OUT	-22000
C1223	Repressed	Enhancers	chr16	76527981	76528168	0	0	0	intergenic	76527982	76528168	+	OUT	-22000
C1224	Repressed	Promoters	chr16	76604442	76604622	0	0	0	intergenic	76604443	76604622	+	OUT	-22000
C1225	Repressed	Promoters	chr16	78217211	78218303	0	0	0	intergenic	78217212	78218303	+	OUT	-22000
C1226	Repressed	Promoters	chr16	78490395	78490883	0	0	0	intergenic	78490396	78490883	+	OUT	-22000
C1227	Induced	Enhancers	chr16	84583449	84586558	-	0	0	intergenic	84583450	84586558	+	OUT	-22000
C1228	Induced	Enhancers	chr16	84590775	84591076	-	0	0	intergenic	84590776	84591076	+	OUT	-22000
C1229	Induced	Enhancers	chr16	84603601	84609205	-	0	0	intergenic	84603602	84609205	+	OUT	-22000
C1230	Induced	Enhancers	chr16	84614920	84615792	-	0	0	intergenic	84614921	84615792	+	OUT	-22000
C1231	Induced	Promoters	chr16	84620179	84623014	-	0	1	intergenic	84620180	84623014	+	OUT	-22000
C1232	Constitutive	Promoters	chr16	85804428	85804806	0	0	0	uc007ztv.1	85794072	85803344	-	promoter	-1273
C1233	Repressed	Enhancers	chr16	87625074	87625879	0	0	0	intergenic	87625075	87625879	+	OUT	-22000
C1234	Induced	Enhancers	chr16	87634899	87635360	-	0	0	intergenic	87634900	87635360	+	OUT	-22000
C1235	Induced	Promoters	chr16	87661442	87662222	-	0	0	intergenic	87661443	87662222	+	OUT	-22000
C1236	Repressed	Enhancers	chr16	90197990	90198313	0	0	0	intergenic	90197991	90198313	+	OUT	-22000
C1237	Repressed	Enhancers	chr16	90677395	90677992	0	0	0	intergenic	90677396	90677992	+	OUT	-22000
C1238	Repressed	Enhancers	chr16	91347709	91347881	0	0	0	intergenic	91347710	91347881	+	OUT	-22000
C1239	Repressed	Enhancers	chr16	91353337	91356441	0	0	0	uc007zxg.1	91373143	91394285	+	promoter	-18253
C1240	Repressed	Enhancers	chr16	91359476	91359718	0	0	0	uc007zxg.1	91373143	91394285	+	promoter	-13545
C1241	Repressed	Enhancers	chr16	91366883	91367840	0	0	0	uc007zxg.1	91373143	91394285	+	promoter	-5781
C1242	Repressed	Enhancers	chr16	91452301	91453082	0	0	0	uc007zxm.1	91465348	91470366	+	promoter	-12656
C1243	Repressed	Enhancers	chr16	91461128	91461980	0	0	0	uc007zxm.1	91465348	91470366	+	promoter	-3793
C1244	Constitutive	Promoters	chr16	91462122	91462579	0	0	0	uc007zxm.1	91465348	91470366	+	promoter	-2997
C1245	Constitutive	Promoters	chr16	91483970	91484534	0	0	0	uc007zxn.1	91485493	91507682	+	promoter	-1240
C1246	Repressed	Enhancers	chr16	91521453	91524670	0	0	0	intergenic	91521454	91524670	+	OUT	-22000
C1247	Repressed	Enhancers	chr16	91526749	91527035	0	0	0	intergenic	91526750	91527035	+	OUT	-22000
C1248	Induced	Promoters	chr16	91933350	91933709	-	0	0	uc007zys.1	91925467	91931875	-	promoter	-1655
C1249	Repressed	Enhancers	chr16	91963401	91963771	0	0	0	intergenic	91963402	91963771	+	OUT	-22000
C1250	Constitutive	Enhancers	chr16	91964590	91965162	0	0	0	intergenic	91964591	91965162	+	OUT	-22000
C1251	Repressed	Enhancers	chr16	92019498	92019726	0	0	0	intergenic	92019499	92019726	+	OUT	-22000
C1252	Repressed	Enhancers	chr16	92572834	92573977	0	0	0	intergenic	92572835	92573977	+	OUT	-22000
C1253	Repressed	Enhancers	chr16	92864479	92864883	0	0	0	intergenic	92864480	92864883	+	OUT	-22000
C1254	Repressed	Enhancers	chr16	92867722	92869037	1	0	0	intergenic	92867723	92869037	+	OUT	-22000
C1255	Constitutive	Enhancers	chr16	93028717	93029240	0	0	0	intergenic	93028718	93029240	+	OUT	-22000
C1256	Repressed	Enhancers	chr16	93031279	93031672	0	0	0	intergenic	93031280	93031672	+	OUT	-22000
C1257	Induced	Enhancers	chr16	93083981	93086213	-	0	0	intergenic	93083982	93086213	+	OUT	-22000
C1258	Induced	Enhancers	chr16	93140880	93142565	-	0	0	intergenic	93140881	93142565	+	OUT	-22000
C1259	Induced	Enhancers	chr16	93189863	93190108	-	0	0	intergenic	93189864	93190108	+	OUT	-22000
C1260	Induced	Enhancers	chr16	93191238	93191939	-	0	0	intergenic	93191239	93191939	+	OUT	-22000
C1261	Constitutive	Promoters	chr16	94534143	94535366	0	0	0	uc008aaj.1	94550026	94558542	+	promoter	-15271
C1262	Induced	Enhancers	chr16	94767508	94768139	-	0	0	uc008abe.1	94719394	94748050	-	promoter	-19774
C1263	Repressed	Enhancers	chr16	94780872	94781362	0	0	0	uc008abf.1	94791616	94885468	+	promoter	-10498
C1264	Constitutive	Promoters	chr16	94945603	94946278	0	0	0	intergenic	94945604	94946278	+	OUT	-22000
C1265	Induced	Enhancers	chr16	95970642	95970926	-	0	0	intergenic	95970643	95970926	+	OUT	-22000
C1266	Induced	Enhancers	chr16	95972098	95972302	-	0	0	intergenic	95972099	95972302	+	OUT	-22000
C1267	Induced	Enhancers	chr16	96004386	96004497	-	0	0	intergenic	96004387	96004497	+	OUT	-22000
C1268	Repressed	Enhancers	chr16	96035436	96037316	0	0	0	intergenic	96035437	96037316	+	OUT	-22000
C1269	Repressed	Enhancers	chr16	96151069	96154211	1	0	0	intergenic	96151070	96154211	+	OUT	-22000
C1270	Repressed	Enhancers	chr16	96177436	96177635	0	0	0	intergenic	96177437	96177635	+	OUT	-22000
C1271	Induced	Promoters	chr17	4907869	4908866	-	0	0	intergenic	4907870	4908866	+	OUT	-22000
C1272	Repressed	Enhancers	chr17	5768850	5769065	0	0	0	intergenic	5768851	5769065	+	OUT	-22000
C1273	Repressed	Promoters	chr17	5770183	5770952	0	0	0	intergenic	5770184	5770952	+	OUT	-22000
C1274	Repressed	Enhancers	chr17	5784121	5784343	0	0	0	uc008afh.1	5799489	5803240	+	promoter	-15256
C1275	Repressed	Enhancers	chr17	5798324	5798831	0	0	0	uc008afh.1	5799489	5803240	+	promoter	-911
C1276	Repressed	Enhancers	chr17	8417961	8418323	0	0	0	uc008ajd.1	8429076	8449992	+	promoter	-10933
C1277	Repressed	Enhancers	chr17	8698837	8699154	0	0	0	intergenic	8698838	8699154	+	OUT	-22000
C1278	Repressed	Enhancers	chr17	10234112	10234427	0	0	0	intergenic	10234113	10234427	+	OUT	-22000
C1279	Constitutive	Promoters	chr17	10514700	10515186	0	0	0	uc008akf.1	10403044	10512719	-	promoter	-2224
C1280	Repressed	Promoters	chr17	10527861	10528557	0	0	0	uc008akf.1	10403044	10512719	-	promoter	-15490
C1281	Repressed	Enhancers	chr17	10552185	10552691	0	0	0	intergenic	10552186	10552691	+	OUT	-22000
C1282	Repressed	Enhancers	chr17	10563270	10563999	0	0	0	intergenic	10563271	10563999	+	OUT	-22000
C1283	Repressed	Enhancers	chr17	15794216	15794475	0	0	0	intergenic	15794217	15794475	+	OUT	-22000
C1284	Constitutive	Promoters	chr17	17141933	17142270	0	0	0	intergenic	17141934	17142270	+	OUT	-22000
C1285	Constitutive	Promoters	chr17	17371439	17372114	0	0	0	intergenic	17371440	17372114	+	OUT	-22000
C1286	Induced	Enhancers	chr17	17999339	18000264	-	0	0	uc008apr.1	17980292	17992152	-	promoter	-7650
C1287	Induced	Enhancers	chr17	18001978	18003428	-	0	0	uc008apr.1	17980292	17992152	-	promoter	-10551
C1288	Repressed	Enhancers	chr17	21615349	21615878	0	0	0	uc008aqy.1	21625951	21644521	+	promoter	-10337
C1289	Constitutive	Promoters	chr17	21816545	21817160	0	0	0	intergenic	21816546	21817160	+	OUT	-22000
C1290	Induced	Promoters	chr17	22362450	22362742	-	0	0	intergenic	22362451	22362742	+	OUT	-22000
C1291	Constitutive	Promoters	chr17	22451565	22452166	0	0	0	intergenic	22451566	22452166	+	OUT	-22000
C1292	Induced	Enhancers	chr17	23790549	23792009	-	0	0	uc008asr.1	23797489	23805586	+	promoter	-6209
C1293	Constitutive	Enhancers	chr17	24143851	24144980	0	0	0	uc008auf.1	24130500	24135050	-	promoter	-9366
C1294	Repressed	Promoters	chr17	24916423	24917003	0	0	0	intergenic	24916424	24917003	+	OUT	-22000
C1295	Repressed	Enhancers	chr17	24917810	24917956	0	0	0	intergenic	24917811	24917956	+	OUT	-22000
C1296	Repressed	Promoters	chr17	24940832	24941436	0	0	0	intergenic	24940833	24941436	+	OUT	-22000
C1297	Constitutive	Promoters	chr17	25320096	25320721	0	0	0	uc008azy.1	25321532	25322477	+	promoter	-1123
C1298	Constitutive	Promoters	chr17	25419110	25419560	0	0	0	uc008bak.1	25397455	25411236	-	promoter	-8099
C1299	Repressed	Enhancers	chr17	26238302	26238771	0	0	0	uc008bdh.1	26228689	26232415	-	promoter	-6122
C1300	Constitutive	Enhancers	chr17	26649385	26650440	0	0	0	uc008bee.1	26642535	26645406	-	promoter	-4507
C1301	Repressed	Enhancers	chr17	26650494	26652125	0	0	0	uc008bee.1	26642535	26645406	-	promoter	-5904
C1302	Repressed	Enhancers	chr17	26669755	26673136	0	0	0	intergenic	26669756	26673136	+	OUT	-22000
C1303	Repressed	Enhancers	chr17	26675077	26675454	0	0	0	intergenic	26675078	26675454	+	OUT	-22000
C1304	Induced	Enhancers	chr17	27188437	27188870	-	0	0	uc008bfi.1	27194480	27259168	+	promoter	-5826
C1305	Repressed	Enhancers	chr17	27310484	27310869	0	0	0	uc008bfl.1	27280915	27304709	-	promoter	-5968
C1306	Constitutive	Enhancers	chr17	27664109	27664515	0	0	0	uc008box.1	27562848	27649777	-	promoter	-14535
C1307	Induced	Enhancers	chr17	27683677	27684794	-	1	0	uc008boy.1	27693526	27700615	+	promoter	-9290
C1308	Constitutive	Enhancers	chr17	27689440	27690174	0	0	0	uc008boy.1	27693526	27700615	+	promoter	-3718
C1309	Repressed	Enhancers	chr17	27780058	27780301	0	0	0	uc008bph.1	27767373	27772187	-	promoter	-7993
C1310	Induced	Promoters	chr17	27961802	27964312	-	0	0	uc008bpp.1	27888179	27957487	-	promoter	-5570
C1311	Induced	Promoters	chr17	29217631	29219561	-	0	0	uc008bsf.1	29194418	29215906	-	promoter	-2690
C1312	Repressed	Enhancers	chr17	29250988	29251288	0	0	0	intergenic	29250989	29251288	+	OUT	-22000
C1313	Induced	Enhancers	chr17	29529543	29536549	-	0	0	intergenic	29529544	29536549	+	OUT	-22000
C1314	Induced	Enhancers	chr17	29552649	29553588	-	0	0	intergenic	29552650	29553588	+	OUT	-22000
C1315	Induced	Promoters	chr17	29575018	29575932	-	0	0	intergenic	29575019	29575932	+	OUT	-22000
C1316	Induced	Enhancers	chr17	29576603	29581130	-	0	0	intergenic	29576604	29581130	+	OUT	-22000
C1317	Induced	Enhancers	chr17	29596498	29596968	-	0	0	intergenic	29596499	29596968	+	OUT	-22000
C1318	Induced	Promoters	chr17	29625312	29627560	-	0	0	uc008bsz.1	29627989	29632404	+	promoter	-1552
C1319	Induced	Enhancers	chr17	29650326	29650533	-	0	0	intergenic	29650327	29650533	+	OUT	-22000
C1320	Constitutive	Enhancers	chr17	31175311	31176164	0	0	0	uc008bui.1	31194685	31235704	+	promoter	-18947
C1321	Induced	Enhancers	chr17	31176533	31177057	-	0	0	uc008bui.1	31194685	31235704	+	promoter	-17889
C1322	Repressed	Enhancers	chr17	31427821	31428216	0	0	0	uc008buw.1	31432427	31487643	+	promoter	-4408
C1323	Repressed	Enhancers	chr17	31970700	31971185	0	0	0	intergenic	31970701	31971185	+	OUT	-22000
C1324	Repressed	Enhancers	chr17	32042496	32043156	0	0	0	intergenic	32042497	32043156	+	OUT	-22000
C1325	Induced	Promoters	chr17	32665536	32665844	-	0	0	uc008bxf.1	32673573	32688742	+	promoter	-7882
C1326	Constitutive	Promoters	chr17	34307993	34308581	0	0	0	uc008cbt.1	34324824	34329221	+	promoter	-16536
C1327	Constitutive	Enhancers	chr17	35020090	35020693	0	0	0	uc008cdz.1	34999551	35018992	-	promoter	-1400
C1328	Induced	Enhancers	chr17	35344505	35345858	-	0	0	uc008cgu.1	35340107	35342296	-	promoter	-2886
C1329	Constitutive	Enhancers	chr17	35346430	35347081	0	0	0	uc008cgu.1	35340107	35342296	-	promoter	-4460
C1330	Repressed	Enhancers	chr17	35903501	35903711	0	0	0	intergenic	35903502	35903711	+	OUT	-22000
C1331	Repressed	Enhancers	chr17	35914286	35914608	0	0	0	intergenic	35914287	35914608	+	OUT	-22000
C1332	Repressed	Enhancers	chr17	35916712	35916889	0	0	0	intergenic	35916713	35916889	+	OUT	-22000
C1333	Constitutive	Enhancers	chr17	35949945	35951275	0	0	0	uc008cio.1	35958657	35959856	+	promoter	-8046
C1334	Repressed	Enhancers	chr17	36355473	36355764	0	0	0	intergenic	36355474	36355764	+	OUT	-22000
C1335	Repressed	Enhancers	chr17	37628993	37629207	0	0	0	uc008cnb.1	37635597	37636551	+	promoter	-6496
C1336	Repressed	Enhancers	chr17	37662735	37662948	0	0	0	uc008cnc.1	37666923	37667877	+	promoter	-4081
C1337	Induced	Promoters	chr17	43024221	43024573	-	0	0	uc008cot.1	42929899	43013373	-	promoter	-11024
C1338	Induced	Enhancers	chr17	43674003	43674515	-	0	0	intergenic	43674004	43674515	+	OUT	-22000
C1339	Induced	Enhancers	chr17	43676022	43676285	-	0	0	intergenic	43676023	43676285	+	OUT	-22000
C1340	Constitutive	Enhancers	chr17	43694395	43695042	0	0	0	uc008cpd.1	43705399	43744354	+	promoter	-10680
C1341	Repressed	Enhancers	chr17	44487534	44487764	0	0	0	intergenic	44487535	44487764	+	OUT	-22000
C1342	Induced	Promoters	chr17	45755927	45757116	-	0	0	uc008crg.1	45737921	45739016	-	promoter	-17506
C1343	Constitutive	Promoters	chr17	45872736	45874318	0	0	0	uc008crk.1	45869812	45870793	-	promoter	-2734
C1344	Repressed	Enhancers	chr17	45888971	45890847	0	0	0	uc008crl.1	45893658	45923766	+	promoter	-3748
C1345	Constitutive	Enhancers	chr17	45944531	45944825	0	0	0	intergenic	45944532	45944825	+	OUT	-22000
C1346	Constitutive	Enhancers	chr17	46477974	46478632	0	0	0	uc008cso.1	46440178	46464972	-	promoter	-13331
C1347	Constitutive	Promoters	chr17	46988782	46995780	12	0	0	uc008cul.1	46935230	46969263	-	promoter	-23018
C1348	Repressed	Enhancers	chr17	47003730	47004319	0	0	0	intergenic	47003731	47004319	+	OUT	-22000
C1349	Constitutive	Enhancers	chr17	47011036	47011350	1	0	0	uc008cum.1	47027569	47029412	+	promoter	-16375
C1350	Repressed	Enhancers	chr17	47016604	47017410	1	0	0	uc008cum.1	47027569	47029412	+	promoter	-10561
C1351	Repressed	Enhancers	chr17	47979164	47979726	0	0	0	uc008cwi.1	47952279	47971640	-	promoter	-7805
C1352	Repressed	Enhancers	chr17	48477145	48477389	0	0	0	uc008cxj.1	48485725	48491598	+	promoter	-8457
C1353	Repressed	Enhancers	chr17	50471126	50471496	0	0	0	intergenic	50471127	50471496	+	OUT	-22000
C1354	Repressed	Enhancers	chr17	50554959	50555164	0	0	0	intergenic	50554960	50555164	+	OUT	-22000
C1355	Constitutive	Promoters	chr17	50609610	50610964	0	0	0	intergenic	50609611	50610964	+	OUT	-22000
C1356	Induced	Enhancers	chr17	57478233	57479257	-	0	0	uc008des.1	57498113	57553184	+	promoter	-19367
C1357	Constitutive	Enhancers	chr17	57486368	57487552	0	0	0	uc008des.1	57498113	57553184	+	promoter	-11152
C1358	Constitutive	Promoters	chr17	64198838	64199358	0	0	0	uc008dfn.1	64213329	64387937	+	promoter	-14230
C1359	Induced	Enhancers	chr17	71527912	71528757	-	0	0	uc008dmb.1	71531899	71584459	+	promoter	-3564
C1360	Repressed	Enhancers	chr17	73144702	73145064	0	0	0	intergenic	73144703	73145064	+	OUT	-22000
C1361	Repressed	Enhancers	chr17	73358213	73358464	0	0	0	intergenic	73358214	73358464	+	OUT	-22000
C1362	Constitutive	Enhancers	chr17	74319911	74321176	0	0	0	intergenic	74319912	74321176	+	OUT	-22000
C1363	Repressed	Enhancers	chr17	75836283	75836494	0	0	0	intergenic	75836284	75836494	+	OUT	-22000
C1364	Induced	Promoters	chr17	78818450	78818933	-	0	0	uc008dov.1	78777224	78817443	-	promoter	-1249
C1365	Repressed	Enhancers	chr17	79842093	79842351	0	0	0	intergenic	79842094	79842351	+	OUT	-22000
C1366	Repressed	Enhancers	chr17	79997463	79997694	0	0	0	uc008dpy.1	80014239	80081492	+	promoter	-16660
C1367	Repressed	Enhancers	chr17	79999265	79999474	0	0	0	uc008dpy.1	80014239	80081492	+	promoter	-14869
C1368	Repressed	Enhancers	chr17	80185957	80186346	0	0	0	intergenic	80185958	80186346	+	OUT	-22000
C1369	Repressed	Enhancers	chr17	80512067	80512691	0	0	0	uc008dqn.1	80526810	80538802	+	promoter	-14430
C1370	Repressed	Enhancers	chr17	81172050	81172262	0	0	0	intergenic	81172051	81172262	+	OUT	-22000
C1371	Repressed	Enhancers	chr17	81200727	81201187	0	0	0	intergenic	81200728	81201187	+	OUT	-22000
C1372	Repressed	Enhancers	chr17	83666695	83667107	0	0	0	intergenic	83666696	83667107	+	OUT	-22000
C1373	Induced	Enhancers	chr17	83673163	83673957	-	0	0	intergenic	83673164	83673957	+	OUT	-22000
C1374	Induced	Promoters	chr17	83675098	83677480	-	0	0	intergenic	83675099	83677480	+	OUT	-22000
C1375	Constitutive	Enhancers	chr17	83711903	83712265	0	0	0	intergenic	83711904	83712265	+	OUT	-22000
C1376	Constitutive	Promoters	chr17	83926442	83926867	0	0	0	uc008dsc.1	83901270	83913641	-	promoter	-13014
C1377	Repressed	Enhancers	chr17	83926949	83927514	0	0	0	uc008dsc.1	83901270	83913641	-	promoter	-13591
C1378	Constitutive	Enhancers	chr17	84044688	84045085	0	0	0	uc008dsd.1	83985296	84031235	-	promoter	-13652
C1379	Constitutive	Promoters	chr17	84260798	84262150	1	0	1	uc008dsm.1	84251090	84253758	-	promoter	-7716
C1380	Constitutive	Enhancers	chr17	84456129	84457137	0	0	0	intergenic	84456130	84457137	+	OUT	-22000
C1381	Induced	Enhancers	chr17	84467578	84468479	-	0	0	intergenic	84467579	84468479	+	OUT	-22000
C1382	Induced	Enhancers	chr17	84481327	84483762	-	0	0	intergenic	84481328	84483762	+	OUT	-22000
C1383	Constitutive	Enhancers	chr17	84499746	84500414	0	0	0	intergenic	84499747	84500414	+	OUT	-22000
C1384	Repressed	Enhancers	chr17	84500626	84501514	0	0	0	intergenic	84500627	84501514	+	OUT	-22000
C1385	Repressed	Enhancers	chr17	84502552	84503527	0	0	0	intergenic	84502553	84503527	+	OUT	-22000
C1386	Constitutive	Enhancers	chr17	84507392	84507837	0	0	0	intergenic	84507393	84507837	+	OUT	-22000
C1387	Repressed	Enhancers	chr17	84513408	84521994	6	0	0	intergenic	84513409	84521994	+	OUT	-22000
C1388	Repressed	Promoters	chr17	84522515	84523274	1	0	0	intergenic	84522516	84523274	+	OUT	-22000
C1389	Repressed	Enhancers	chr17	84540144	84541606	0	0	0	uc008dso.1	84533372	84539181	-	promoter	-1694
C1390	Repressed	Enhancers	chr17	84548292	84548590	0	0	0	uc008dso.1	84533372	84539181	-	promoter	-9260
C1391	Repressed	Enhancers	chr17	85259267	85259420	0	0	0	intergenic	85259268	85259420	+	OUT	-22000
C1392	Induced	Promoters	chr17	86563627	86564130	-	0	0	uc008dug.1	86567124	87054029	+	promoter	-3245
C1393	Repressed	Enhancers	chr17	87076803	87076975	0	0	0	intergenic	87076804	87076975	+	OUT	-22000
C1394	Constitutive	Enhancers	chr17	87131341	87131870	0	0	0	intergenic	87131342	87131870	+	OUT	-22000
C1395	Repressed	Enhancers	chr17	87144113	87144437	0	0	0	uc008duj.1	87153241	87230922	+	promoter	-8965
C1396	Repressed	Enhancers	chr17	87569655	87569880	0	0	0	intergenic	87569656	87569880	+	OUT	-22000
C1397	Repressed	Promoters	chr17	87858346	87859007	0	0	0	uc008dux.1	87832756	87846183	-	promoter	-12494
C1398	Constitutive	Promoters	chr17	87930231	87931833	0	0	0	intergenic	87930232	87931833	+	OUT	-22000
C1399	Repressed	Enhancers	chr17	88532119	88532728	0	0	0	intergenic	88532120	88532728	+	OUT	-22000
C1400	Repressed	Enhancers	chr17	88737031	88737302	0	0	0	intergenic	88737032	88737302	+	OUT	-22000
C1401	Constitutive	Promoters	chr17	88839517	88839934	0	0	0	uc008dvk.1	88840097	88877411	+	promoter	-371
C1402	Constitutive	Enhancers	chr17	88908237	88909041	0	0	0	intergenic	88908238	88909041	+	OUT	-22000
C1403	Constitutive	Promoters	chr17	88928122	88928691	0	0	0	uc008dvo.1	88929600	88987705	+	promoter	-1193
C1404	Induced	Promoters	chr17	95263814	95264507	-	0	0	intergenic	95263815	95264507	+	OUT	-22000
C1405	Repressed	Enhancers	chr18	4313746	4314357	0	0	0	intergenic	4313747	4314357	+	OUT	-22000
C1406	Repressed	Enhancers	chr18	4803961	4804264	0	0	0	intergenic	4803962	4804264	+	OUT	-22000
C1407	Repressed	Enhancers	chr18	4873229	4873673	0	0	0	intergenic	4873230	4873673	+	OUT	-22000
C1408	Repressed	Enhancers	chr18	4908189	4909038	0	0	0	uc008dym.1	4920564	5046644	+	promoter	-11950
C1409	Repressed	Enhancers	chr18	5133904	5134763	0	0	0	intergenic	5133905	5134763	+	OUT	-22000
C1410	Repressed	Enhancers	chr18	5141420	5142701	0	0	0	intergenic	5141421	5142701	+	OUT	-22000
C1411	Induced	Promoters	chr18	5162088	5163944	-	0	0	intergenic	5162089	5163944	+	OUT	-22000
C1412	Repressed	Enhancers	chr18	5344886	5345172	0	0	0	uc008dyt.1	5210028	5334432	-	promoter	-10597
C1413	Induced	Enhancers	chr18	5809523	5809696	-	0	0	intergenic	5809524	5809696	+	OUT	-22000
C1414	Induced	Enhancers	chr18	5819654	5820078	-	0	0	intergenic	5819655	5820078	+	OUT	-22000
C1415	Induced	Promoters	chr18	5989444	5990262	-	0	0	intergenic	5989445	5990262	+	OUT	-22000
C1416	Repressed	Enhancers	chr18	6144831	6145100	0	0	0	uc008dzc.1	6024447	6136096	-	promoter	-8870
C1417	Constitutive	Promoters	chr18	7692901	7693536	0	0	0	intergenic	7692902	7693536	+	OUT	-22000
C1418	Constitutive	Enhancers	chr18	8377032	8377339	0	0	0	intergenic	8377033	8377339	+	OUT	-22000
C1419	Repressed	Enhancers	chr18	9489963	9490197	0	0	0	intergenic	9489964	9490197	+	OUT	-22000
C1420	Repressed	Enhancers	chr18	9552542	9553310	0	0	0	intergenic	9552543	9553310	+	OUT	-22000
C1421	Repressed	Enhancers	chr18	11221774	11221986	0	0	0	intergenic	11221775	11221986	+	OUT	-22000
C1422	Induced	Promoters	chr18	11288615	11288862	-	0	0	intergenic	11288616	11288862	+	OUT	-22000
C1423	Repressed	Promoters	chr18	11510444	11511248	0	0	0	intergenic	11510445	11511248	+	OUT	-22000
C1424	Repressed	Enhancers	chr18	11952591	11953406	0	0	0	intergenic	11952592	11953406	+	OUT	-22000
C1425	Constitutive	Promoters	chr18	13113970	13114920	1	0	0	uc008ecu.1	12914536	13100229	-	promoter	-14216
C1426	Repressed	Enhancers	chr18	13279742	13281114	0	0	0	intergenic	13279743	13281114	+	OUT	-22000
C1427	Repressed	Enhancers	chr18	20945000	20946414	0	0	0	intergenic	20945001	20946414	+	OUT	-22000
C1428	Repressed	Enhancers	chr18	20959525	20960610	0	0	0	intergenic	20959526	20960610	+	OUT	-22000
C1429	Repressed	Enhancers	chr18	32307014	32307619	0	0	0	uc008ejb.1	32282779	32299224	-	promoter	-8093
C1430	Repressed	Enhancers	chr18	34277622	34277944	0	0	0	intergenic	34277623	34277944	+	OUT	-22000
C1431	Constitutive	Enhancers	chr18	34537437	34537834	0	0	0	uc008eki.1	34504539	34532983	-	promoter	-4653
C1432	Repressed	Enhancers	chr18	34538034	34538345	0	0	0	uc008eki.1	34504539	34532983	-	promoter	-5207
C1433	Repressed	Enhancers	chr18	34540248	34540426	0	0	0	uc008eki.1	34504539	34532983	-	promoter	-7354
C1434	Repressed	Promoters	chr18	35046232	35046449	0	0	0	intergenic	35046233	35046449	+	OUT	-22000
C1435	Constitutive	Promoters	chr18	35114229	35115964	1	0	0	uc008elv.1	35097086	35113977	-	promoter	-1120
C1436	Repressed	Promoters	chr18	35117930	35118873	0	0	0	uc008elv.1	35097086	35113977	-	promoter	-4425
C1437	Induced	Enhancers	chr18	35904873	35905684	-	0	0	uc008emt.2	35893675	35900171	-	promoter	-5108
C1438	Induced	Promoters	chr18	35911505	35912128	-	0	0	uc008emt.2	35893675	35900171	-	promoter	-11646
C1439	Induced	Promoters	chr18	36032860	36033979	-	0	0	intergenic	36032861	36033979	+	OUT	-22000
C1440	Repressed	Promoters	chr18	36099218	36099571	0	0	0	intergenic	36099219	36099571	+	OUT	-22000
C1441	Constitutive	Promoters	chr18	36101174	36102939	1	0	0	intergenic	36101175	36102939	+	OUT	-22000
C1442	Repressed	Enhancers	chr18	36488268	36488808	0	0	0	uc008eni.1	36508277	36553024	+	promoter	-19738
C1443	Repressed	Enhancers	chr18	36631932	36632197	0	0	0	uc008enk.1	36563332	36614149	-	promoter	-17916
C1444	Repressed	Enhancers	chr18	36857921	36862368	0	0	0	uc008eoe.1	36844576	36855579	-	promoter	-4566
C1445	Repressed	Enhancers	chr18	36865403	36870126	0	0	0	uc008eoe.1	36844576	36855579	-	promoter	-12186
C1446	Constitutive	Enhancers	chr18	38331881	38332318	0	0	0	intergenic	38331882	38332318	+	OUT	-22000
C1447	Repressed	Enhancers	chr18	38524638	38524856	0	0	0	intergenic	38524639	38524856	+	OUT	-22000
C1448	Repressed	Enhancers	chr18	38526777	38527286	0	0	0	intergenic	38526778	38527286	+	OUT	-22000
C1449	Repressed	Enhancers	chr18	38531771	38532125	0	0	0	intergenic	38531772	38532125	+	OUT	-22000
C1450	Repressed	Enhancers	chr18	38544719	38544930	0	0	0	intergenic	38544720	38544930	+	OUT	-22000
C1451	Repressed	Enhancers	chr18	39995412	39995789	0	0	0	intergenic	39995413	39995789	+	OUT	-22000
C1452	Repressed	Enhancers	chr18	46636722	46636952	0	0	0	intergenic	46636723	46636952	+	OUT	-22000
C1453	Repressed	Enhancers	chr18	52909525	52909751	0	0	0	uc008exm.1	52927362	53075584	+	promoter	-17723
C1454	Constitutive	Enhancers	chr18	53307785	53308739	0	0	0	intergenic	53307786	53308739	+	OUT	-22000
C1455	Repressed	Enhancers	chr18	53317504	53319757	0	0	0	uc008exr.1	53336018	53380514	+	promoter	-17387
C1456	Constitutive	Promoters	chr18	53334633	53335061	0	0	0	uc008exr.1	53336018	53380514	+	promoter	-1170
C1457	Repressed	Enhancers	chr18	54454285	54454559	0	0	0	intergenic	54454286	54454559	+	OUT	-22000
C1458	Repressed	Enhancers	chr18	55006304	55006936	0	0	0	intergenic	55006305	55006936	+	OUT	-22000
C1459	Repressed	Enhancers	chr18	55284753	55284959	0	0	0	intergenic	55284754	55284959	+	OUT	-22000
C1460	Induced	Enhancers	chr18	55356964	55357297	-	0	0	intergenic	55356965	55357297	+	OUT	-22000
C1461	Induced	Enhancers	chr18	58691106	58691382	-	0	0	intergenic	58691107	58691382	+	OUT	-22000
C1462	Repressed	Enhancers	chr18	60798011	60798339	0	0	0	uc008faq.1	60753635	60789739	-	promoter	-8436
C1463	Repressed	Enhancers	chr18	60911744	60912357	0	0	0	uc008fau.1	60845629	60908319	-	promoter	-3732
C1464	Constitutive	Enhancers	chr18	61258547	61259122	0	0	0	uc008fbn.1	61265225	61290793	+	promoter	-6390
C1465	Repressed	Enhancers	chr18	61260131	61261285	0	1	0	uc008fbn.1	61265225	61290793	+	promoter	-4516
C1466	Constitutive	Enhancers	chr18	61607495	61608484	0	1	0	intergenic	61607496	61608484	+	OUT	-22000
C1467	Repressed	Enhancers	chr18	61792104	61792356	0	0	0	uc008fch.1	61799306	61807126	+	promoter	-7075
C1468	Repressed	Enhancers	chr18	62203738	62207200	0	0	0	intergenic	62203739	62207200	+	OUT	-22000
C1469	Repressed	Enhancers	chr18	62228482	62228708	0	0	0	intergenic	62228483	62228708	+	OUT	-22000
C1470	Induced	Promoters	chr18	65534032	65534466	-	0	0	intergenic	65534033	65534466	+	OUT	-22000
C1471	Induced	Enhancers	chr18	65535287	65536311	-	0	0	intergenic	65535288	65536311	+	OUT	-22000
C1472	Induced	Enhancers	chr18	65541476	65542985	-	0	0	intergenic	65541477	65542985	+	OUT	-22000
C1473	Induced	Enhancers	chr18	65555284	65556401	-	0	0	intergenic	65555285	65556401	+	OUT	-22000
C1474	Induced	Enhancers	chr18	65573148	65573340	-	0	0	uc008fex.1	65590650	65600865	+	promoter	-17405
C1475	Induced	Enhancers	chr18	65574541	65576265	-	1	0	uc008fex.1	65590650	65600865	+	promoter	-15246
C1476	Constitutive	Enhancers	chr18	67439803	67440203	0	0	0	uc008fly.1	67448876	67478495	+	promoter	-8872
C1477	Repressed	Enhancers	chr18	67620461	67620919	0	0	0	uc008fmi.1	67624502	67633951	+	promoter	-3811
C1478	Repressed	Promoters	chr18	70594713	70595136	0	0	0	intergenic	70594714	70595136	+	OUT	-22000
C1479	Constitutive	Promoters	chr18	70803099	70804772	0	0	0	intergenic	70803100	70804772	+	OUT	-22000
C1480	Repressed	Enhancers	chr18	73701203	73702181	0	0	0	intergenic	73701204	73702181	+	OUT	-22000
C1481	Constitutive	Promoters	chr18	73976101	73976600	0	0	0	uc008fox.1	73929693	73975046	-	promoter	-1305
C1482	Induced	Promoters	chr18	75035374	75035967	-	0	0	intergenic	75035375	75035967	+	OUT	-22000
C1483	Induced	Enhancers	chr18	75039211	75039892	-	0	0	intergenic	75039212	75039892	+	OUT	-22000
C1484	Induced	Enhancers	chr18	75070244	75071387	-	0	0	intergenic	75070245	75071387	+	OUT	-22000
C1485	Induced	Enhancers	chr18	75072998	75073186	-	0	0	intergenic	75072999	75073186	+	OUT	-22000
C1486	Constitutive	Promoters	chr18	75501604	75503166	0	0	0	intergenic	75501605	75503166	+	OUT	-22000
C1487	Constitutive	Enhancers	chr18	77293583	77294218	0	0	0	uc008fqw.1	77215887	77286035	-	promoter	-7866
C1488	Induced	Promoters	chr18	78134776	78135513	-	0	0	uc008frz.1	78151948	78188367	+	promoter	-16803
C1489	Constitutive	Promoters	chr18	79454129	79454447	0	0	0	intergenic	79454130	79454447	+	OUT	-22000
C1490	Repressed	Promoters	chr18	79454801	79455158	0	0	0	intergenic	79454802	79455158	+	OUT	-22000
C1491	Repressed	Enhancers	chr18	79490379	79490688	0	0	0	intergenic	79490380	79490688	+	OUT	-22000
C1492	Constitutive	Promoters	chr18	80365783	80366890	0	0	0	uc008fsl.1	80382977	80390308	+	promoter	-16640
C1493	Repressed	Enhancers	chr18	80674778	80675206	0	0	0	uc008ftb.1	80604697	80666406	-	promoter	-8586
C1494	Repressed	Enhancers	chr18	80680215	80680704	0	0	0	uc008ftb.1	80604697	80666406	-	promoter	-14054
C1495	Repressed	Enhancers	chr18	82639500	82639957	0	0	0	uc008ftr.1	82644514	82728095	+	promoter	-4785
C1496	Constitutive	Promoters	chr19	3931627	3932121	0	0	0	uc008fxq.1	3913490	3929716	-	promoter	-2158
C1497	Induced	Promoters	chr19	5529462	5530099	-	0	0	uc008gdr.1	5494847	5510489	-	promoter	-19292
C1498	Constitutive	Enhancers	chr19	5805879	5808252	0	0	0	uc008gfj.1	5798394	5802671	-	promoter	-4395
C1499	Constitutive	Enhancers	chr19	5813460	5813950	0	0	0	uc008gfj.1	5798394	5802671	-	promoter	-11034
C1500	Induced	Enhancers	chr19	6155994	6158399	-	1	0	uc008ghp.1	6164457	6172471	+	promoter	-7260
C1501	Constitutive	Enhancers	chr19	6182556	6182892	0	0	0	uc008ghr.1	6184406	6224219	+	promoter	-1681
C1502	Repressed	Enhancers	chr19	6668449	6669010	0	0	0	intergenic	6668450	6669010	+	OUT	-22000
C1503	Induced	Promoters	chr19	6943231	6945392	-	0	0	uc008gjb.1	6919112	6932701	-	promoter	-11611
C1504	Induced	Enhancers	chr19	6950751	6952432	-	0	0	uc008gjb.1	6919112	6932701	-	promoter	-18891
C1505	Repressed	Promoters	chr19	8094012	8095488	0	0	0	intergenic	8094013	8095488	+	OUT	-22000
C1506	Constitutive	Enhancers	chr19	9988197	9989802	1	0	0	uc008gos.1	9947166	9973965	-	promoter	-15035
C1507	Repressed	Enhancers	chr19	10006430	10007012	0	0	0	intergenic	10006431	10007012	+	OUT	-22000
C1508	Repressed	Enhancers	chr19	10010901	10014893	0	0	1	intergenic	10010902	10014893	+	OUT	-22000
C1509	Repressed	Enhancers	chr19	10017619	10017881	0	0	0	intergenic	10017620	10017881	+	OUT	-22000
C1510	Constitutive	Promoters	chr19	10026407	10027929	0	0	0	intergenic	10026408	10027929	+	OUT	-22000
C1511	Induced	Enhancers	chr19	10040550	10040919	-	0	0	uc008got.1	10056857	10059582	+	promoter	-16122
C1512	Repressed	Enhancers	chr19	10247093	10247891	0	0	0	uc008gpd.1	10257462	10261863	+	promoter	-9969
C1513	Constitutive	Enhancers	chr19	10451012	10451353	0	0	0	uc008gpo.1	10463972	10522934	+	promoter	-12789
C1514	Induced	Enhancers	chr19	11125248	11126483	-	0	0	uc008grn.1	11122102	11125010	-	promoter	-856
C1515	Induced	Enhancers	chr19	11127486	11128701	-	0	0	uc008grn.1	11122102	11125010	-	promoter	-3084
C1516	Induced	Enhancers	chr19	11130064	11130467	-	0	0	uc008grn.1	11122102	11125010	-	promoter	-5256
C1517	Constitutive	Promoters	chr19	11367432	11367841	0	0	0	uc008gry.1	11348355	11358303	-	promoter	-9334
C1518	Induced	Enhancers	chr19	11424737	11424967	-	0	0	uc008grz.1	11395897	11410606	-	promoter	-14246
C1519	Induced	Enhancers	chr19	11478524	11479904	-	0	0	uc008gsc.1	11482190	11501519	+	promoter	-2975
C1520	Constitutive	Promoters	chr19	12084610	12085357	0	0	0	intergenic	12084611	12085357	+	OUT	-22000
C1521	Constitutive	Promoters	chr19	12086917	12088300	0	0	0	intergenic	12086918	12088300	+	OUT	-22000
C1522	Constitutive	Enhancers	chr19	12098549	12099071	0	0	0	intergenic	12098550	12099071	+	OUT	-22000
C1523	Repressed	Enhancers	chr19	12516958	12518872	1	0	0	uc008gub.1	12535268	12539775	+	promoter	-17352
C1524	Repressed	Enhancers	chr19	14709906	14710182	0	0	0	intergenic	14709907	14710182	+	OUT	-22000
C1525	Constitutive	Enhancers	chr19	16103369	16103913	0	0	0	intergenic	16103370	16103913	+	OUT	-22000
C1526	Repressed	Promoters	chr19	16104080	16104341	0	0	0	intergenic	16104081	16104341	+	OUT	-22000
C1527	Constitutive	Enhancers	chr19	16121252	16122385	0	0	0	intergenic	16121253	16122385	+	OUT	-22000
C1528	Constitutive	Promoters	chr19	16124640	16125083	0	0	0	intergenic	16124641	16125083	+	OUT	-22000
C1529	Repressed	Enhancers	chr19	16158630	16161291	0	1	0	intergenic	16158631	16161291	+	OUT	-22000
C1530	Repressed	Enhancers	chr19	16185241	16185436	0	0	0	intergenic	16185242	16185436	+	OUT	-22000
C1531	Constitutive	Enhancers	chr19	21106356	21106977	0	1	0	intergenic	21106357	21106977	+	OUT	-22000
C1532	Constitutive	Enhancers	chr19	21110979	21111530	0	0	0	intergenic	21110980	21111530	+	OUT	-22000
C1533	Induced	Enhancers	chr19	21550824	21551163	-	0	0	uc008gyx.1	21465796	21547151	-	promoter	-3843
C1534	Constitutive	Promoters	chr19	21788299	21788574	0	0	0	intergenic	21788300	21788574	+	OUT	-22000
C1535	Repressed	Enhancers	chr19	21811919	21812288	0	0	0	intergenic	21811920	21812288	+	OUT	-22000
C1536	Repressed	Enhancers	chr19	21970046	21970263	0	0	0	intergenic	21970047	21970263	+	OUT	-22000
C1537	Repressed	Enhancers	chr19	21987609	21988138	0	0	0	intergenic	21987610	21988138	+	OUT	-22000
C1538	Induced	Enhancers	chr19	22019959	22020362	-	0	0	intergenic	22019960	22020362	+	OUT	-22000
C1539	Repressed	Enhancers	chr19	25045846	25046070	0	0	0	uc008hax.1	24994918	25036074	-	promoter	-9884
C1540	Repressed	Enhancers	chr19	25062609	25065215	0	0	0	uc008hay.1	25074018	25141596	+	promoter	-10105
C1541	Repressed	Enhancers	chr19	25066532	25066847	0	0	0	uc008hay.1	25074018	25141596	+	promoter	-7328
C1542	Constitutive	Enhancers	chr19	25069430	25069801	0	0	0	uc008hay.1	25074018	25141596	+	promoter	-4402
C1543	Induced	Enhancers	chr19	29296945	29297183	-	0	0	intergenic	29296946	29297183	+	OUT	-22000
C1544	Induced	Enhancers	chr19	29476741	29478318	-	1	0	uc008hdj.1	29485449	29529090	+	promoter	-7919
C1545	Repressed	Enhancers	chr19	32978749	32979018	0	0	0	intergenic	32978750	32979018	+	OUT	-22000
C1546	Repressed	Enhancers	chr19	32980508	32980758	0	0	0	intergenic	32980509	32980758	+	OUT	-22000
C1547	Induced	Enhancers	chr19	34510245	34510611	-	0	0	intergenic	34510246	34510611	+	OUT	-22000
C1548	Induced	Promoters	chr19	36892578	36893046	-	0	0	uc008hht.1	36908863	36947041	+	promoter	-16050
C1549	Constitutive	Enhancers	chr19	37444735	37445387	0	0	0	uc008hin.1	37450892	37496349	+	promoter	-5830
C1550	Repressed	Enhancers	chr19	37569723	37570259	0	0	0	intergenic	37569724	37570259	+	OUT	-22000
C1551	Induced	Promoters	chr19	37584174	37584554	-	0	0	intergenic	37584175	37584554	+	OUT	-22000
C1552	Induced	Enhancers	chr19	37585622	37585803	-	0	0	intergenic	37585623	37585803	+	OUT	-22000
C1553	Induced	Enhancers	chr19	37590239	37590449	-	0	0	intergenic	37590240	37590449	+	OUT	-22000
C1554	Induced	Promoters	chr19	37888944	37889426	-	0	0	intergenic	37888945	37889426	+	OUT	-22000
C1555	Induced	Enhancers	chr19	37895810	37896533	-	0	0	intergenic	37895811	37896533	+	OUT	-22000
C1556	Constitutive	Enhancers	chr19	41477079	41477526	0	0	0	uc008hlu.1	41348707	41459560	-	promoter	-17743
C1557	Induced	Promoters	chr19	41515648	41517411	-	0	0	intergenic	41515649	41517411	+	OUT	-22000
C1558	Induced	Enhancers	chr19	41519644	41521082	-	0	0	intergenic	41519645	41521082	+	OUT	-22000
C1559	Induced	Enhancers	chr19	41981267	41981825	-	0	0	uc008hml.1	41986360	41993155	+	promoter	-4813
C1560	Repressed	Enhancers	chr19	42736094	42736704	0	0	0	intergenic	42736095	42736704	+	OUT	-22000
C1561	Induced	Enhancers	chr19	44341241	44342040	-	1	0	intergenic	44341242	44342040	+	OUT	-22000
C1562	Repressed	Enhancers	chr19	44355401	44355668	0	0	0	uc008hpp.1	44368577	44381350	+	promoter	-13042
C1563	Repressed	Promoters	chr19	44356593	44358432	0	0	0	uc008hpp.1	44368577	44381350	+	promoter	-11064
C1564	Constitutive	Promoters	chr19	46076642	46077140	0	0	0	uc008hrx.1	46077997	46080643	+	promoter	-1105
C1565	Induced	Enhancers	chr19	46418020	46418618	-	0	0	uc008htg.1	46405033	46413114	-	promoter	-5205
C1566	Repressed	Promoters	chr19	46833480	46833985	0	0	0	uc008hue.1	46836098	46953070	+	promoter	-2365
C1567	Constitutive	Promoters	chr19	47138765	47139323	0	0	0	uc008hun.1	47142237	47157969	+	promoter	-3192
C1568	Repressed	Enhancers	chr19	53347983	53348285	0	0	0	uc008hwn.1	53323265	53329688	-	promoter	-18446
C1569	Constitutive	Enhancers	chr19	53377922	53378345	0	0	0	uc008hwo.1	53384995	53450300	+	promoter	-6861
C1570	Constitutive	Enhancers	chr19	53498933	53499396	0	0	0	intergenic	53498934	53499396	+	OUT	-22000
C1571	Repressed	Enhancers	chr19	53640545	53640751	0	0	0	intergenic	53640546	53640751	+	OUT	-22000
C1572	Induced	Enhancers	chr19	55717684	55718195	-	0	0	intergenic	55717685	55718195	+	OUT	-22000
C1573	Repressed	Enhancers	chr19	55723761	55723989	0	0	0	intergenic	55723762	55723989	+	OUT	-22000
C1574	Repressed	Enhancers	chr19	55734835	55735086	0	0	0	intergenic	55734836	55735086	+	OUT	-22000
C1575	Constitutive	Enhancers	chr19	56466267	56466695	0	0	0	uc008hyu.1	56394531	56464525	-	promoter	-1956
C1576	Constitutive	Promoters	chr19	61251796	61252134	0	0	0	intergenic	61251797	61252134	+	OUT	-22000
C1577	Constitutive	Promoters	chr19	61275374	61275962	0	0	0	intergenic	61275375	61275962	+	OUT	-22000
C1578	Constitutive	Enhancers	chr19	61320541	61321265	0	0	0	uc008icj.1	61300313	61304262	-	promoter	-16641
C1579	Repressed	Enhancers	chr2	3575012	3575811	0	0	0	intergenic	3575013	3575811	+	OUT	-22000
C1580	Repressed	Enhancers	chr2	3585870	3586245	0	0	0	intergenic	3585871	3586245	+	OUT	-22000
C1581	Induced	Enhancers	chr2	10893801	10894022	-	0	0	intergenic	10893802	10894022	+	OUT	-22000
C1582	Constitutive	Enhancers	chr2	11254117	11255314	0	0	0	uc008iid.1	11261115	11265733	+	promoter	-6399
C1583	Induced	Enhancers	chr2	11296622	11297209	-	0	0	intergenic	11296623	11297209	+	OUT	-22000
C1584	Induced	Enhancers	chr2	11298388	11299182	-	0	0	intergenic	11298389	11299182	+	OUT	-22000
C1585	Repressed	Enhancers	chr2	11945313	11945533	0	0	0	intergenic	11945314	11945533	+	OUT	-22000
C1586	Constitutive	Promoters	chr2	18529434	18531415	0	0	0	intergenic	18529435	18531415	+	OUT	-22000
C1587	Induced	Promoters	chr2	18688099	18689341	-	0	0	intergenic	18688100	18689341	+	OUT	-22000
C1588	Induced	Promoters	chr2	18742851	18743812	-	0	0	intergenic	18742852	18743812	+	OUT	-22000
C1589	Induced	Enhancers	chr2	18959753	18960188	-	0	0	intergenic	18959754	18960188	+	OUT	-22000
C1590	Induced	Enhancers	chr2	19549660	19550819	-	0	0	intergenic	19549661	19550819	+	OUT	-22000
C1591	Induced	Enhancers	chr2	19552799	19553209	-	0	0	intergenic	19552800	19553209	+	OUT	-22000
C1592	Repressed	Enhancers	chr2	22579509	22579789	0	0	0	intergenic	22579510	22579789	+	OUT	-22000
C1593	Induced	Promoters	chr2	22599528	22600860	-	0	2	intergenic	22599529	22600860	+	OUT	-22000
C1594	Constitutive	Enhancers	chr2	22601027	22602044	0	0	0	intergenic	22601028	22602044	+	OUT	-22000
C1595	Repressed	Enhancers	chr2	22602562	22603980	0	0	0	intergenic	22602563	22603980	+	OUT	-22000
C1596	Repressed	Enhancers	chr2	22607379	22608265	0	0	0	intergenic	22607380	22608265	+	OUT	-22000
C1597	Repressed	Enhancers	chr2	22613641	22614001	0	0	0	uc008inl.1	22629951	22684106	+	promoter	-16129
C1598	Repressed	Enhancers	chr2	22908004	22908562	0	0	0	uc008ins.1	22795508	22895760	-	promoter	-12523
C1599	Repressed	Enhancers	chr2	23959109	23959654	0	0	0	uc008iol.1	23927240	23952115	-	promoter	-7267
C1600	Constitutive	Enhancers	chr2	24166927	24167382	0	0	0	intergenic	24166928	24167382	+	OUT	-22000
C1601	Induced	Enhancers	chr2	24426460	24427154	-	0	0	intergenic	24426461	24427154	+	OUT	-22000
C1602	Induced	Enhancers	chr2	25404686	25405969	-	0	0	uc008ism.1	25373501	25402414	-	promoter	-2914
C1603	Repressed	Enhancers	chr2	26389913	26390449	0	0	0	intergenic	26389914	26390449	+	OUT	-22000
C1604	Repressed	Enhancers	chr2	26599704	26600185	0	0	0	intergenic	26599705	26600185	+	OUT	-22000
C1605	Repressed	Enhancers	chr2	28208438	28208667	0	0	0	intergenic	28208439	28208667	+	OUT	-22000
C1606	Repressed	Enhancers	chr2	28257358	28258133	0	0	0	intergenic	28257359	28258133	+	OUT	-22000
C1607	Constitutive	Enhancers	chr2	28289202	28289443	0	0	0	uc008iye.1	28303460	28311028	+	promoter	-14137
C1608	Induced	Promoters	chr2	28350475	28350767	-	0	0	uc008iyl.1	28353285	28360915	+	promoter	-2663
C1609	Constitutive	Enhancers	chr2	30407207	30407545	0	0	0	intergenic	30407208	30407545	+	OUT	-22000
C1610	Repressed	Enhancers	chr2	30513164	30513733	0	0	0	intergenic	30513165	30513733	+	OUT	-22000
C1611	Repressed	Enhancers	chr2	30545639	30546684	0	0	0	intergenic	30545640	30546684	+	OUT	-22000
C1612	Repressed	Enhancers	chr2	30548734	30549204	0	0	0	intergenic	30548735	30549204	+	OUT	-22000
C1613	Constitutive	Promoters	chr2	30627140	30629442	3	0	0	intergenic	30627141	30629442	+	OUT	-22000
C1614	Induced	Enhancers	chr2	30768824	30769874	-	0	0	uc008jcz.1	30744990	30758817	-	promoter	-10532
C1615	Induced	Enhancers	chr2	30773791	30777546	-	1	0	uc008jcz.1	30744990	30758817	-	promoter	-16852
C1616	Constitutive	Promoters	chr2	30782056	30785879	5	0	0	intergenic	30782057	30785879	+	OUT	-22000
C1617	Constitutive	Promoters	chr2	30787258	30787800	1	0	0	intergenic	30787259	30787800	+	OUT	-22000
C1618	Induced	Promoters	chr2	30798085	30798505	-	0	0	uc008jda.1	30808520	30814535	+	promoter	-10224
C1619	Repressed	Promoters	chr2	31094529	31095228	0	0	0	uc008jdq.1	31101442	31150991	+	promoter	-6563
C1620	Repressed	Promoters	chr2	31943663	31944270	0	0	0	uc008jej.1	31905574	31940189	-	promoter	-3778
C1621	Induced	Promoters	chr2	31992965	31993795	-	0	0	uc008jem.1	32006676	32090044	+	promoter	-13295
C1622	Repressed	Enhancers	chr2	32722938	32724137	0	0	0	uc008jhc.1	32731743	32780768	+	promoter	-8205
C1623	Repressed	Enhancers	chr2	33763737	33764344	0	0	0	intergenic	33763738	33764344	+	OUT	-22000
C1624	Constitutive	Promoters	chr2	34501665	34502157	0	0	0	intergenic	34501666	34502157	+	OUT	-22000
C1625	Repressed	Enhancers	chr2	35088101	35088756	0	0	0	intergenic	35088102	35088756	+	OUT	-22000
C1626	Repressed	Enhancers	chr2	35348956	35349240	0	0	0	intergenic	35348957	35349240	+	OUT	-22000
C1627	Repressed	Enhancers	chr2	35350755	35352579	0	0	0	intergenic	35350756	35352579	+	OUT	-22000
C1628	Repressed	Enhancers	chr2	35361167	35361439	0	0	0	intergenic	35361168	35361439	+	OUT	-22000
C1629	Repressed	Enhancers	chr2	35362544	35363132	0	0	0	intergenic	35362545	35363132	+	OUT	-22000
C1630	Induced	Enhancers	chr2	38145677	38146172	-	0	0	uc008jng.1	37654510	38142867	-	promoter	-3058
C1631	Repressed	Enhancers	chr2	38336403	38341913	1	1	0	intergenic	38336404	38341913	+	OUT	-22000
C1632	Induced	Promoters	chr2	43593852	43594708	-	0	0	uc008jou.1	43604343	43747293	+	promoter	-10062
C1633	Induced	Enhancers	chr2	44808376	44809062	-	0	0	intergenic	44808377	44809062	+	OUT	-22000
C1634	Induced	Enhancers	chr2	45047255	45047824	-	0	0	intergenic	45047256	45047824	+	OUT	-22000
C1635	Repressed	Enhancers	chr2	45051728	45053422	1	0	0	intergenic	45051729	45053422	+	OUT	-22000
C1636	Repressed	Enhancers	chr2	45094526	45094851	0	0	0	intergenic	45094527	45094851	+	OUT	-22000
C1637	Repressed	Enhancers	chr2	45100623	45103137	2	0	0	intergenic	45100624	45103137	+	OUT	-22000
C1638	Repressed	Enhancers	chr2	45117286	45117501	0	0	0	uc008jpl.1	45132558	45136718	+	promoter	-15164
C1639	Repressed	Enhancers	chr2	45124837	45126914	0	0	0	uc008jpl.1	45132558	45136718	+	promoter	-6682
C1640	Repressed	Enhancers	chr2	45129877	45132401	0	0	0	uc008jpl.1	45132558	45136718	+	promoter	-1418
C1641	Induced	Enhancers	chr2	46100672	46100882	-	0	0	intergenic	46100673	46100882	+	OUT	-22000
C1642	Constitutive	Promoters	chr2	46214721	46216198	0	0	0	intergenic	46214722	46216198	+	OUT	-22000
C1643	Constitutive	Enhancers	chr2	46226415	46226888	0	0	0	intergenic	46226416	46226888	+	OUT	-22000
C1644	Constitutive	Enhancers	chr2	46298287	46299677	0	0	0	intergenic	46298288	46299677	+	OUT	-22000
C1645	Induced	Promoters	chr2	48188439	48188607	-	0	0	intergenic	48188440	48188607	+	OUT	-22000
C1646	Repressed	Enhancers	chr2	48311691	48312561	0	0	0	intergenic	48311692	48312561	+	OUT	-22000
C1647	Repressed	Enhancers	chr2	49267373	49267575	0	0	0	intergenic	49267374	49267575	+	OUT	-22000
C1648	Repressed	Enhancers	chr2	49271776	49273212	0	0	0	intergenic	49271777	49273212	+	OUT	-22000
C1649	Repressed	Enhancers	chr2	49280461	49280729	0	0	0	intergenic	49280462	49280729	+	OUT	-22000
C1650	Repressed	Enhancers	chr2	50374432	50375144	0	0	0	intergenic	50374433	50375144	+	OUT	-22000
C1651	Repressed	Enhancers	chr2	50524619	50525695	0	0	0	intergenic	50524620	50525695	+	OUT	-22000
C1652	Constitutive	Enhancers	chr2	50542720	50543717	0	0	0	intergenic	50542721	50543717	+	OUT	-22000
C1653	Repressed	Enhancers	chr2	50545014	50545297	0	0	0	intergenic	50545015	50545297	+	OUT	-22000
C1654	Repressed	Enhancers	chr2	50546458	50546668	0	0	0	intergenic	50546459	50546668	+	OUT	-22000
C1655	Repressed	Enhancers	chr2	50697260	50697421	0	0	0	intergenic	50697261	50697421	+	OUT	-22000
C1656	Repressed	Enhancers	chr2	51167859	51168071	0	0	0	intergenic	51167860	51168071	+	OUT	-22000
C1657	Repressed	Enhancers	chr2	52704240	52704660	0	0	0	uc008jrh.1	52716901	52993236	+	promoter	-12450
C1658	Repressed	Enhancers	chr2	60010487	60011058	0	0	0	intergenic	60010488	60011058	+	OUT	-22000
C1659	Repressed	Enhancers	chr2	60014297	60014496	0	0	0	intergenic	60014298	60014496	+	OUT	-22000
C1660	Repressed	Promoters	chr2	60975561	60975801	0	0	0	intergenic	60975562	60975801	+	OUT	-22000
C1661	Repressed	Enhancers	chr2	60977158	60977523	0	0	0	intergenic	60977159	60977523	+	OUT	-22000
C1662	Induced	Enhancers	chr2	61327686	61328638	-	0	0	intergenic	61327687	61328638	+	OUT	-22000
C1663	Repressed	Enhancers	chr2	61352087	61352444	0	0	0	intergenic	61352088	61352444	+	OUT	-22000
C1664	Constitutive	Promoters	chr2	62279061	62279641	0	0	0	intergenic	62279062	62279641	+	OUT	-22000
C1665	Induced	Promoters	chr2	62486563	62487205	-	0	0	uc008jvm.1	62435506	62484217	-	promoter	-2667
C1666	Repressed	Enhancers	chr2	68620524	68620891	0	0	0	intergenic	68620525	68620891	+	OUT	-22000
C1667	Induced	Enhancers	chr2	68624660	68626215	-	0	0	intergenic	68624661	68626215	+	OUT	-22000
C1668	Induced	Enhancers	chr2	68631965	68632878	-	0	0	intergenic	68631966	68632878	+	OUT	-22000
C1669	Induced	Enhancers	chr2	68633990	68635690	-	0	0	intergenic	68633991	68635690	+	OUT	-22000
C1670	Induced	Enhancers	chr2	68663364	68663988	-	0	0	intergenic	68663365	68663988	+	OUT	-22000
C1671	Constitutive	Enhancers	chr2	69557269	69557839	0	0	0	uc008jyk.1	69560875	69574192	+	promoter	-3320
C1672	Constitutive	Promoters	chr2	71418863	71419628	0	0	0	intergenic	71418864	71419628	+	OUT	-22000
C1673	Repressed	Enhancers	chr2	71482210	71482632	0	0	0	intergenic	71482211	71482632	+	OUT	-22000
C1674	Repressed	Enhancers	chr2	71500033	71501345	0	0	0	intergenic	71500034	71501345	+	OUT	-22000
C1675	Constitutive	Enhancers	chr2	71776864	71777358	0	0	0	intergenic	71776865	71777358	+	OUT	-22000
C1676	Repressed	Enhancers	chr2	72841197	72843063	1	1	0	uc008kcf.1	72826302	72831790	-	promoter	-10340
C1677	Repressed	Enhancers	chr2	72875370	72877148	0	0	0	intergenic	72875371	72877148	+	OUT	-22000
C1678	Constitutive	Promoters	chr2	72877547	72877979	0	0	0	intergenic	72877548	72877979	+	OUT	-22000
C1679	Constitutive	Enhancers	chr2	72879386	72879988	0	0	0	intergenic	72879387	72879988	+	OUT	-22000
C1680	Repressed	Enhancers	chr2	72892008	72892620	0	0	0	intergenic	72892009	72892620	+	OUT	-22000
C1681	Repressed	Enhancers	chr2	72893960	72894592	0	0	0	intergenic	72893961	72894592	+	OUT	-22000
C1682	Repressed	Enhancers	chr2	72902138	72902477	0	0	0	intergenic	72902139	72902477	+	OUT	-22000
C1683	Repressed	Promoters	chr2	73379013	73379324	0	0	0	uc008kcw.1	73267673	73367467	-	promoter	-11702
C1684	Repressed	Promoters	chr2	75423017	75423230	0	0	0	intergenic	75423018	75423230	+	OUT	-22000
C1685	Repressed	Enhancers	chr2	75450791	75451337	0	0	0	intergenic	75450792	75451337	+	OUT	-22000
C1686	Repressed	Enhancers	chr2	75601127	75601625	0	0	0	intergenic	75601128	75601625	+	OUT	-22000
C1687	Repressed	Enhancers	chr2	75611513	75616521	2	0	0	intergenic	75611514	75616521	+	OUT	-22000
C1688	Repressed	Enhancers	chr2	75630452	75631364	0	1	0	intergenic	75630453	75631364	+	OUT	-22000
C1689	Constitutive	Enhancers	chr2	77142465	77142932	0	0	0	intergenic	77142466	77142932	+	OUT	-22000
C1690	Induced	Enhancers	chr2	78896422	78896702	-	0	0	intergenic	78896423	78896702	+	OUT	-22000
C1691	Induced	Promoters	chr2	78927280	78928356	-	0	0	intergenic	78927281	78928356	+	OUT	-22000
C1692	Induced	Enhancers	chr2	78971633	78972514	-	0	0	intergenic	78971634	78972514	+	OUT	-22000
C1693	Induced	Enhancers	chr2	79067870	79069105	-	0	0	intergenic	79067871	79069105	+	OUT	-22000
C1694	Repressed	Enhancers	chr2	79458781	79459681	0	0	0	uc008kgu.1	79475696	79511004	+	promoter	-16464
C1695	Repressed	Enhancers	chr2	83899343	83899592	0	0	0	intergenic	83899344	83899592	+	OUT	-22000
C1696	Constitutive	Enhancers	chr2	84107028	84107290	0	0	0	intergenic	84107029	84107290	+	OUT	-22000
C1697	Induced	Promoters	chr2	84636500	84637220	-	0	0	uc008kjf.1	84639006	84649869	+	promoter	-2145
C1698	Repressed	Enhancers	chr2	90481553	90482172	0	0	0	intergenic	90481554	90482172	+	OUT	-22000
C1699	Constitutive	Promoters	chr2	90920543	90929118	6	0	0	uc008kuj.1	90936953	90955913	+	promoter	-12122
C1700	Constitutive	Enhancers	chr2	90930708	90934645	6	0	1	uc008kuj.1	90936953	90955913	+	promoter	-4276
C1701	Constitutive	Enhancers	chr2	91036805	91037587	0	0	0	uc008kve.1	91024218	91035273	-	promoter	-1923
C1702	Constitutive	Promoters	chr2	91895560	91896461	0	0	0	uc008kxg.1	91898736	91902320	+	promoter	-2725
C1703	Repressed	Enhancers	chr2	92323714	92323919	0	0	0	intergenic	92323715	92323919	+	OUT	-22000
C1704	Constitutive	Promoters	chr2	92369395	92369856	0	0	0	uc008kyd.1	92381531	92381568	+	promoter	-11905
C1705	Constitutive	Promoters	chr2	94018683	94019227	1	0	0	intergenic	94018684	94019227	+	OUT	-22000
C1706	Induced	Promoters	chr2	101711310	101711612	-	0	0	uc008lhq.1	101726418	101741796	+	promoter	-14956
C1707	Repressed	Enhancers	chr2	102807045	102809117	0	0	0	intergenic	102807046	102809117	+	OUT	-22000
C1708	Constitutive	Enhancers	chr2	103785057	103785518	0	0	0	intergenic	103785058	103785518	+	OUT	-22000
C1709	Repressed	Enhancers	chr2	112057896	112058130	0	0	0	intergenic	112057897	112058130	+	OUT	-22000
C1710	Repressed	Enhancers	chr2	116757927	116758209	0	0	0	intergenic	116757928	116758209	+	OUT	-22000
C1711	Constitutive	Enhancers	chr2	116768054	116768652	0	0	0	intergenic	116768055	116768652	+	OUT	-22000
C1712	Constitutive	Promoters	chr2	116799139	116802642	2	0	0	intergenic	116799140	116802642	+	OUT	-22000
C1713	Repressed	Enhancers	chr2	116814696	116816137	0	0	0	intergenic	116814697	116816137	+	OUT	-22000
C1714	Induced	Enhancers	chr2	116824623	116825744	-	0	0	intergenic	116824624	116825744	+	OUT	-22000
C1715	Induced	Enhancers	chr2	116843586	116844741	-	0	0	intergenic	116843587	116844741	+	OUT	-22000
C1716	Induced	Enhancers	chr2	116930977	116931726	-	0	0	uc008lrh.1	116947185	116998589	+	promoter	-15833
C1717	Induced	Promoters	chr2	116932525	116932811	-	0	0	uc008lrh.1	116947185	116998589	+	promoter	-14516
C1718	Induced	Enhancers	chr2	116933413	116934303	-	0	0	uc008lrh.1	116947185	116998589	+	promoter	-13326
C1719	Constitutive	Promoters	chr2	118721797	118722412	0	0	0	uc008lsw.1	118727350	118750260	+	promoter	-5245
C1720	Repressed	Enhancers	chr2	118787167	118787688	0	0	0	intergenic	118787168	118787688	+	OUT	-22000
C1721	Constitutive	Enhancers	chr2	118798433	118798898	0	0	0	intergenic	118798434	118798898	+	OUT	-22000
C1722	Constitutive	Promoters	chr2	118801830	118802496	0	0	0	intergenic	118801831	118802496	+	OUT	-22000
C1723	Induced	Enhancers	chr2	120486045	120486276	-	0	0	uc008lwq.1	120490678	120504039	+	promoter	-4517
C1724	Constitutive	Promoters	chr2	122201190	122203816	3	0	3	uc008mar.1	122174627	122194654	-	promoter	-7849
C1725	Induced	Promoters	chr2	122232933	122233254	-	0	0	uc008mas.1	122252212	122286866	+	promoter	-19118
C1726	Induced	Enhancers	chr2	122234336	122235422	-	0	0	uc008mas.1	122252212	122286866	+	promoter	-17332
C1727	Induced	Enhancers	chr2	122396132	122396464	-	0	0	intergenic	122396133	122396464	+	OUT	-22000
C1728	Induced	Promoters	chr2	122397785	122398141	-	0	0	intergenic	122397786	122398141	+	OUT	-22000
C1729	Repressed	Enhancers	chr2	122407226	122407586	0	0	0	intergenic	122407227	122407586	+	OUT	-22000
C1730	Induced	Enhancers	chr2	122477197	122479268	-	0	0	intergenic	122477198	122479268	+	OUT	-22000
C1731	Induced	Enhancers	chr2	122490763	122491786	-	0	0	intergenic	122490764	122491786	+	OUT	-22000
C1732	Induced	Promoters	chr2	125108158	125108478	-	0	0	intergenic	125108159	125108478	+	OUT	-22000
C1733	Repressed	Enhancers	chr2	125616909	125618472	1	0	0	uc008mcz.1	125562721	125608606	-	promoter	-9085
C1734	Repressed	Promoters	chr2	126508019	126508555	1	0	0	uc008mdy.1	126464756	126502073	-	promoter	-6214
C1735	Induced	Enhancers	chr2	127148413	127149690	-	0	0	uc008mff.1	127161894	127164113	+	promoter	-12842
C1736	Induced	Enhancers	chr2	128066249	128067658	-	0	0	intergenic	128066250	128067658	+	OUT	-22000
C1737	Induced	Enhancers	chr2	128291070	128291699	-	0	0	intergenic	128291071	128291699	+	OUT	-22000
C1738	Repressed	Enhancers	chr2	129009622	129009869	0	0	0	uc008mhi.1	129024535	129026912	+	promoter	-14789
C1739	Repressed	Enhancers	chr2	129163829	129164046	0	0	0	intergenic	129163830	129164046	+	OUT	-22000
C1740	Repressed	Enhancers	chr2	129371239	129373347	0	0	0	uc008mhx.1	129284094	129362338	-	promoter	-9955
C1741	Repressed	Enhancers	chr2	129374457	129375955	0	0	0	uc008mhx.1	129284094	129362338	-	promoter	-12868
C1742	Repressed	Enhancers	chr2	129411528	129412378	0	0	0	uc008mhz.1	129418574	129457964	+	promoter	-6620
C1743	Repressed	Enhancers	chr2	129718418	129721411	0	0	0	intergenic	129718419	129721411	+	OUT	-22000
C1744	Repressed	Enhancers	chr2	129728874	129729946	0	0	0	intergenic	129728875	129729946	+	OUT	-22000
C1745	Repressed	Promoters	chr2	130676907	130677456	0	0	0	uc008mjx.1	130533588	130665846	-	promoter	-11336
C1746	Repressed	Enhancers	chr2	130686891	130687559	0	0	0	intergenic	130686892	130687559	+	OUT	-22000
C1747	Constitutive	Enhancers	chr2	130917585	130918090	0	0	0	uc008mko.1	130894955	130912501	-	promoter	-5337
C1748	Constitutive	Enhancers	chr2	130922141	130922526	0	0	0	uc008mko.1	130894955	130912501	-	promoter	-9833
C1749	Induced	Enhancers	chr2	130950106	130950401	-	0	0	uc008mkr.1	130953147	130971719	+	promoter	-2893
C1750	Constitutive	Promoters	chr2	131218532	131218872	0	0	0	intergenic	131218533	131218872	+	OUT	-22000
C1751	Repressed	Enhancers	chr2	131256260	131256677	0	0	0	intergenic	131256261	131256677	+	OUT	-22000
C1752	Constitutive	Enhancers	chr2	131976390	131978891	0	0	0	uc008mmi.1	131878231	131970844	-	promoter	-6797
C1753	Repressed	Enhancers	chr2	132006440	132006903	0	0	0	intergenic	132006441	132006903	+	OUT	-22000
C1754	Repressed	Enhancers	chr2	132037783	132038463	0	0	0	intergenic	132037784	132038463	+	OUT	-22000
C1755	Repressed	Enhancers	chr2	132046588	132048149	0	0	0	intergenic	132046589	132048149	+	OUT	-22000
C1756	Constitutive	Enhancers	chr2	132049615	132050142	0	0	0	intergenic	132049616	132050142	+	OUT	-22000
C1757	Repressed	Enhancers	chr2	132050585	132051372	0	0	0	intergenic	132050586	132051372	+	OUT	-22000
C1758	Repressed	Promoters	chr2	136504418	136504838	0	0	0	intergenic	136504419	136504838	+	OUT	-22000
C1759	Constitutive	Promoters	chr2	136505457	136505714	0	0	0	intergenic	136505458	136505714	+	OUT	-22000
C1760	Constitutive	Promoters	chr2	143990502	143992499	0	0	0	intergenic	143990503	143992499	+	OUT	-22000
C1761	Repressed	Enhancers	chr2	144024427	144024670	0	0	0	intergenic	144024428	144024670	+	OUT	-22000
C1762	Constitutive	Enhancers	chr2	144039497	144040270	0	0	0	intergenic	144039498	144040270	+	OUT	-22000
C1763	Repressed	Enhancers	chr2	144040308	144040627	0	0	0	intergenic	144040309	144040627	+	OUT	-22000
C1764	Constitutive	Enhancers	chr2	144119932	144120153	0	0	0	intergenic	144119933	144120153	+	OUT	-22000
C1765	Constitutive	Promoters	chr2	144163008	144163880	0	0	0	uc008mqx.1	144130911	144157816	-	promoter	-5628
C1766	Repressed	Enhancers	chr2	148312481	148317946	0	0	0	intergenic	148312482	148317946	+	OUT	-22000
C1767	Repressed	Enhancers	chr2	148347694	148348335	0	0	0	intergenic	148347695	148348335	+	OUT	-22000
C1768	Induced	Enhancers	chr2	148399379	148399619	-	0	0	intergenic	148399380	148399619	+	OUT	-22000
C1769	Constitutive	Promoters	chr2	148682181	148683194	0	0	0	uc008mts.1	148672452	148676670	-	promoter	-6018
C1770	Induced	Enhancers	chr2	150392688	150393690	-	0	0	uc008muc.1	150396169	150404678	+	promoter	-2979
C1771	Repressed	Enhancers	chr2	153368396	153370610	0	0	0	uc008nhv.1	153233202	153355707	-	promoter	-13796
C1772	Repressed	Enhancers	chr2	153384089	153384294	0	0	0	intergenic	153384090	153384294	+	OUT	-22000
C1773	Repressed	Enhancers	chr2	153386440	153388428	0	0	0	intergenic	153386441	153388428	+	OUT	-22000
C1774	Induced	Enhancers	chr2	154252432	154252749	-	0	0	uc008njf.1	154262253	154365092	+	promoter	-9662
C1775	Induced	Enhancers	chr2	154558325	154558765	-	0	0	intergenic	154558326	154558765	+	OUT	-22000
C1776	Repressed	Enhancers	chr2	154611173	154611579	0	0	0	uc008njr.1	154616892	154692979	+	promoter	-5515
C1777	Repressed	Enhancers	chr2	156241436	156242806	0	0	0	uc008nng.1	156246787	156328164	+	promoter	-4665
C1778	Repressed	Enhancers	chr2	156244352	156244574	0	0	0	uc008nng.1	156246787	156328164	+	promoter	-2323
C1779	Repressed	Enhancers	chr2	157326138	157327116	0	0	0	intergenic	157326139	157327116	+	OUT	-22000
C1780	Repressed	Enhancers	chr2	157993340	157993968	0	0	0	intergenic	157993341	157993968	+	OUT	-22000
C1781	Repressed	Enhancers	chr2	157999685	158001881	0	0	0	uc008npu.1	158017743	158021474	+	promoter	-16959
C1782	Repressed	Enhancers	chr2	158003028	158003241	0	0	0	uc008npu.1	158017743	158021474	+	promoter	-14608
C1783	Induced	Enhancers	chr2	159413000	159413335	-	0	0	intergenic	159413001	159413335	+	OUT	-22000
C1784	Repressed	Enhancers	chr2	159894564	159894781	0	0	0	intergenic	159894565	159894781	+	OUT	-22000
C1785	Repressed	Enhancers	chr2	160034318	160036806	0	0	0	intergenic	160034319	160036806	+	OUT	-22000
C1786	Repressed	Enhancers	chr2	160051011	160051415	0	0	0	intergenic	160051012	160051415	+	OUT	-22000
C1787	Repressed	Enhancers	chr2	160277435	160277683	0	0	0	intergenic	160277436	160277683	+	OUT	-22000
C1788	Repressed	Enhancers	chr2	160445987	160446373	0	0	0	intergenic	160445988	160446373	+	OUT	-22000
C1789	Induced	Enhancers	chr2	163408973	163409171	-	0	0	uc008ntc.1	163428049	163438589	+	promoter	-18976
C1790	Induced	Enhancers	chr2	163755272	163755481	-	0	0	uc008nto.1	163689616	163744419	-	promoter	-10958
C1791	Induced	Enhancers	chr2	164275077	164275308	-	0	0	uc008nuq.1	164249746	164268688	-	promoter	-6505
C1792	Induced	Enhancers	chr2	164280445	164280918	-	0	0	uc008nur.1	164286470	164292827	+	promoter	-5788
C1793	Induced	Enhancers	chr2	164347070	164348169	-	0	0	intergenic	164347071	164348169	+	OUT	-22000
C1794	Induced	Enhancers	chr2	164354204	164354470	-	0	0	intergenic	164354205	164354470	+	OUT	-22000
C1795	Constitutive	Enhancers	chr2	164691910	164693383	0	0	0	uc008nwn.1	164665017	164683208	-	promoter	-9439
C1796	Constitutive	Enhancers	chr2	164764248	164764775	0	0	0	uc008nwt.1	164773750	164781346	+	promoter	-9238
C1797	Repressed	Enhancers	chr2	164768204	164768428	0	0	0	uc008nwt.1	164773750	164781346	+	promoter	-5433
C1798	Induced	Promoters	chr2	164869172	164869485	-	0	0	uc008nwv.1	164825856	164860279	-	promoter	-9050
C1799	Induced	Promoters	chr2	165742765	165743345	-	0	0	intergenic	165742766	165743345	+	OUT	-22000
C1800	Constitutive	Enhancers	chr2	165752987	165753661	0	0	0	intergenic	165752988	165753661	+	OUT	-22000
C1801	Repressed	Enhancers	chr2	165773641	165774377	0	0	0	intergenic	165773642	165774377	+	OUT	-22000
C1802	Constitutive	Promoters	chr2	165780246	165781274	1	0	0	intergenic	165780247	165781274	+	OUT	-22000
C1803	Constitutive	Enhancers	chr2	165793711	165796019	0	1	0	intergenic	165793712	165796019	+	OUT	-22000
C1804	Constitutive	Enhancers	chr2	165807629	165809468	0	0	0	uc008nyi.1	165818136	165896966	+	promoter	-9587
C1805	Induced	Enhancers	chr2	165812602	165812961	-	0	0	uc008nyi.1	165818136	165896966	+	promoter	-5354
C1806	Constitutive	Enhancers	chr2	166005970	166007414	0	1	0	intergenic	166005971	166007414	+	OUT	-22000
C1807	Repressed	Enhancers	chr2	166059958	166061137	0	0	0	intergenic	166059959	166061137	+	OUT	-22000
C1808	Repressed	Enhancers	chr2	166087171	166087782	0	0	0	intergenic	166087172	166087782	+	OUT	-22000
C1809	Repressed	Enhancers	chr2	166114740	166115099	0	0	0	intergenic	166114741	166115099	+	OUT	-22000
C1810	Repressed	Enhancers	chr2	166179319	166179550	0	0	0	intergenic	166179320	166179550	+	OUT	-22000
C1811	Repressed	Enhancers	chr2	166271353	166274619	2	0	0	intergenic	166271354	166274619	+	OUT	-22000
C1812	Repressed	Enhancers	chr2	166297010	166297394	0	0	0	intergenic	166297011	166297394	+	OUT	-22000
C1813	Repressed	Enhancers	chr2	166306712	166306899	0	0	0	intergenic	166306713	166306899	+	OUT	-22000
C1814	Constitutive	Enhancers	chr2	166555061	166556133	1	0	0	uc008nyn.1	166391844	166539332	-	promoter	-16265
C1815	Induced	Enhancers	chr2	166564431	166565241	-	0	0	intergenic	166564432	166565241	+	OUT	-22000
C1816	Constitutive	Enhancers	chr2	166596806	166597344	0	0	0	intergenic	166596807	166597344	+	OUT	-22000
C1817	Induced	Promoters	chr2	166611978	166612617	-	0	0	uc008nyp.1	166618030	166619888	+	promoter	-5732
C1818	Repressed	Promoters	chr2	166833054	166833356	0	0	0	uc008nza.1	166840812	166851307	+	promoter	-7606
C1819	Constitutive	Promoters	chr2	167175138	167179246	0	0	0	uc008nzm.1	167123944	167174678	-	promoter	-2514
C1820	Constitutive	Promoters	chr2	167182994	167184050	0	0	0	uc008nzm.1	167123944	167174678	-	promoter	-8844
C1821	Repressed	Promoters	chr2	167184687	167185884	2	0	0	uc008nzm.1	167123944	167174678	-	promoter	-10608
C1822	Repressed	Promoters	chr2	167187010	167188685	1	0	0	uc008nzm.1	167123944	167174678	-	promoter	-13170
C1823	Constitutive	Promoters	chr2	167191058	167192228	0	0	0	uc008nzm.1	167123944	167174678	-	promoter	-16965
C1824	Repressed	Enhancers	chr2	167192847	167194265	0	0	0	uc008nzm.1	167123944	167174678	-	promoter	-18878
C1825	Repressed	Enhancers	chr2	167200040	167201994	0	0	0	intergenic	167200041	167201994	+	OUT	-22000
C1826	Repressed	Enhancers	chr2	167206952	167208899	0	0	0	intergenic	167206953	167208899	+	OUT	-22000
C1827	Constitutive	Enhancers	chr2	167576952	167581594	3	0	0	intergenic	167576953	167581594	+	OUT	-22000
C1828	Constitutive	Enhancers	chr2	167584591	167587867	0	0	0	intergenic	167584592	167587867	+	OUT	-22000
C1829	Constitutive	Enhancers	chr2	167589347	167591144	1	0	0	intergenic	167589348	167591144	+	OUT	-22000
C1830	Constitutive	Enhancers	chr2	167599618	167601467	1	0	0	intergenic	167599619	167601467	+	OUT	-22000
C1831	Induced	Enhancers	chr2	167629885	167631910	-	0	0	intergenic	167629886	167631910	+	OUT	-22000
C1832	Constitutive	Enhancers	chr2	167640599	167641234	0	0	0	intergenic	167640600	167641234	+	OUT	-22000
C1833	Induced	Enhancers	chr2	167648955	167649379	-	0	0	intergenic	167648956	167649379	+	OUT	-22000
C1834	Induced	Enhancers	chr2	167711650	167713865	-	0	0	intergenic	167711651	167713865	+	OUT	-22000
C1835	Constitutive	Enhancers	chr2	167750176	167752635	0	1	0	uc008oaj.1	167757826	167804885	+	promoter	-6420
C1836	Constitutive	Promoters	chr2	167995059	167996269	0	0	0	uc008oap.1	167978102	167979977	-	promoter	-15687
C1837	Repressed	Enhancers	chr2	168277033	168277756	0	0	0	intergenic	168277034	168277756	+	OUT	-22000
C1838	Repressed	Enhancers	chr2	169973300	169973691	0	0	0	uc008obv.1	169935578	169968178	-	promoter	-5318
C1839	Induced	Promoters	chr2	169978819	169979663	-	0	0	uc008obv.1	169935578	169968178	-	promoter	-11063
C1840	Constitutive	Promoters	chr2	169980062	169981274	0	0	0	uc008obv.1	169935578	169968178	-	promoter	-12490
C1841	Constitutive	Enhancers	chr2	170027228	170027989	0	0	0	uc008obw.1	170017947	170019553	-	promoter	-8056
C1842	Induced	Promoters	chr2	170030542	170031678	-	0	0	uc008obw.1	170017947	170019553	-	promoter	-11557
C1843	Repressed	Promoters	chr2	170043766	170044017	0	0	0	intergenic	170043767	170044017	+	OUT	-22000
C1844	Constitutive	Promoters	chr2	170046409	170047024	0	0	0	intergenic	170046410	170047024	+	OUT	-22000
C1845	Repressed	Enhancers	chr2	170078208	170078335	0	0	0	intergenic	170078209	170078335	+	OUT	-22000
C1846	Constitutive	Enhancers	chr2	170149415	170150176	0	0	0	intergenic	170149416	170150176	+	OUT	-22000
C1847	Repressed	Enhancers	chr2	172871936	172872392	0	0	0	intergenic	172871937	172872392	+	OUT	-22000
C1848	Repressed	Enhancers	chr2	173843394	173843692	0	0	0	intergenic	173843395	173843692	+	OUT	-22000
C1849	Repressed	Enhancers	chr2	178232395	178232963	0	0	0	intergenic	178232396	178232963	+	OUT	-22000
C1850	Repressed	Enhancers	chr2	178240595	178241146	0	0	0	intergenic	178240596	178241146	+	OUT	-22000
C1851	Induced	Enhancers	chr2	181218224	181218527	-	0	0	uc008omj.1	181227914	181229682	+	promoter	-9538
C1852	Constitutive	Enhancers	chr2	181410168	181410637	0	0	0	uc008ona.1	181404541	181406345	-	promoter	-4058
C1853	Constitutive	Promoters	chr3	8245180	8245522	0	0	0	intergenic	8245181	8245522	+	OUT	-22000
C1854	Induced	Promoters	chr3	8766098	8766289	-	0	0	intergenic	8766099	8766289	+	OUT	-22000
C1855	Repressed	Enhancers	chr3	9198781	9199112	0	0	0	intergenic	9198782	9199112	+	OUT	-22000
C1856	Repressed	Enhancers	chr3	9647118	9647320	0	0	0	intergenic	9647119	9647320	+	OUT	-22000
C1857	Repressed	Enhancers	chr3	9666153	9666356	0	0	0	intergenic	9666154	9666356	+	OUT	-22000
C1858	Induced	Enhancers	chr3	9878770	9879218	-	0	0	intergenic	9878771	9879218	+	OUT	-22000
C1859	Repressed	Enhancers	chr3	9884946	9885257	0	0	0	intergenic	9884947	9885257	+	OUT	-22000
C1860	Constitutive	Promoters	chr3	9974402	9974748	0	0	0	intergenic	9974403	9974748	+	OUT	-22000
C1861	Repressed	Enhancers	chr3	15283876	15284719	0	0	0	intergenic	15283877	15284719	+	OUT	-22000
C1862	Constitutive	Promoters	chr3	18524080	18524292	0	0	0	intergenic	18524081	18524292	+	OUT	-22000
C1863	Induced	Enhancers	chr3	18524724	18525006	-	0	0	intergenic	18524725	18525006	+	OUT	-22000
C1864	Constitutive	Enhancers	chr3	19529819	19530540	0	0	0	uc008orw.1	19544459	19591599	+	promoter	-14279
C1865	Repressed	Enhancers	chr3	21707600	21707808	0	0	0	uc008osv.1	21652450	21699695	-	promoter	-8009
C1866	Repressed	Enhancers	chr3	21723542	21723759	0	0	0	intergenic	21723543	21723759	+	OUT	-22000
C1867	Constitutive	Enhancers	chr3	21851986	21852427	0	0	0	intergenic	21851987	21852427	+	OUT	-22000
C1868	Induced	Promoters	chr3	27187618	27188813	-	0	0	intergenic	27187619	27188813	+	OUT	-22000
C1869	Induced	Promoters	chr3	27190020	27190366	-	0	0	intergenic	27190021	27190366	+	OUT	-22000
C1870	Constitutive	Enhancers	chr3	30982634	30983273	0	0	0	uc008ovt.1	30993982	31000315	+	promoter	-11028
C1871	Repressed	Enhancers	chr3	32269035	32269411	0	0	0	uc008owc.1	32233715	32264587	-	promoter	-4636
C1872	Constitutive	Promoters	chr3	35579341	35579928	0	0	0	uc008oyr.1	35496073	35565085	-	promoter	-14550
C1873	Constitutive	Promoters	chr3	35631321	35631674	0	0	0	intergenic	35631322	35631674	+	OUT	-22000
C1874	Induced	Promoters	chr3	36430901	36431455	-	0	0	uc008ozk.1	36413978	36420327	-	promoter	-10851
C1875	Constitutive	Enhancers	chr3	36432015	36432431	0	0	0	uc008ozk.1	36413978	36420327	-	promoter	-11896
C1876	Repressed	Enhancers	chr3	37038266	37040891	0	0	1	uc008pai.1	37019643	37024875	-	promoter	-14704
C1877	Repressed	Enhancers	chr3	37072527	37072735	0	0	0	intergenic	37072528	37072735	+	OUT	-22000
C1878	Constitutive	Enhancers	chr3	37102912	37103574	0	0	0	intergenic	37102913	37103574	+	OUT	-22000
C1879	Repressed	Enhancers	chr3	37231229	37231466	0	0	0	uc008pap.1	37247771	37303719	+	promoter	-16423
C1880	Repressed	Enhancers	chr3	41216776	41217002	0	0	0	intergenic	41216777	41217002	+	OUT	-22000
C1881	Constitutive	Enhancers	chr3	51013635	51014358	0	0	0	uc008pdm.1	51028368	51055495	+	promoter	-14371
C1882	Induced	Promoters	chr3	51440546	51441017	-	0	0	intergenic	51440547	51441017	+	OUT	-22000
C1883	Repressed	Enhancers	chr3	51984599	51985255	0	0	0	uc008peh.1	51976083	51983893	-	promoter	-1034
C1884	Repressed	Promoters	chr3	51999881	52000317	0	0	0	uc008peh.1	51976083	51983893	-	promoter	-16206
C1885	Repressed	Promoters	chr3	52001788	52003411	0	0	0	uc008peh.1	51976083	51983893	-	promoter	-18707
C1886	Repressed	Enhancers	chr3	54618451	54618739	0	0	0	uc008pfw.1	54607036	54611713	-	promoter	-6882
C1887	Repressed	Enhancers	chr3	58305916	58306186	0	0	0	intergenic	58305917	58306186	+	OUT	-22000
C1888	Constitutive	Promoters	chr3	60212404	60212770	0	0	0	intergenic	60212405	60212770	+	OUT	-22000
C1889	Repressed	Enhancers	chr3	60273427	60273948	0	0	0	uc008pjb.1	60277031	60433670	+	promoter	-3343
C1890	Repressed	Enhancers	chr3	61200188	61200407	0	0	0	intergenic	61200189	61200407	+	OUT	-22000
C1891	Repressed	Enhancers	chr3	61213134	61215165	0	0	0	intergenic	61213135	61215165	+	OUT	-22000
C1892	Repressed	Enhancers	chr3	61219996	61220862	0	0	0	intergenic	61219997	61220862	+	OUT	-22000
C1893	Induced	Promoters	chr3	65238905	65239391	-	0	0	intergenic	65238906	65239391	+	OUT	-22000
C1894	Constitutive	Promoters	chr3	65390213	65390720	0	0	0	intergenic	65390214	65390720	+	OUT	-22000
C1895	Repressed	Promoters	chr3	65462505	65463605	0	0	0	uc008pks.1	65470189	65490101	+	promoter	-7133
C1896	Constitutive	Enhancers	chr3	65622497	65622946	0	0	0	intergenic	65622498	65622946	+	OUT	-22000
C1897	Induced	Enhancers	chr3	65731372	65734240	-	0	0	intergenic	65731373	65734240	+	OUT	-22000
C1898	Induced	Promoters	chr3	65778214	65779228	-	0	0	uc008pku.1	65750072	65762147	-	promoter	-16574
C1899	Repressed	Enhancers	chr3	67380264	67380552	0	0	0	uc008plp.1	67386689	67408153	+	promoter	-6280
C1900	Induced	Promoters	chr3	68441574	68442244	-	0	0	intergenic	68441575	68442244	+	OUT	-22000
C1901	Repressed	Promoters	chr3	68480830	68481209	0	0	0	uc008plu.1	68494565	68502447	+	promoter	-13545
C1902	Repressed	Enhancers	chr3	68973848	68975362	0	0	0	intergenic	68973849	68975362	+	OUT	-22000
C1903	Constitutive	Enhancers	chr3	69009130	69010153	0	0	0	intergenic	69009131	69010153	+	OUT	-22000
C1904	Repressed	Enhancers	chr3	75097017	75097350	0	0	0	intergenic	75097018	75097350	+	OUT	-22000
C1905	Induced	Enhancers	chr3	78981080	78982162	-	0	0	uc008pnn.1	78915422	78977120	-	promoter	-4501
C1906	Induced	Promoters	chr3	78983407	78983874	-	0	0	uc008pnn.1	78915422	78977120	-	promoter	-6521
C1907	Induced	Enhancers	chr3	78985496	78986107	-	0	0	uc008pnn.1	78915422	78977120	-	promoter	-8682
C1908	Induced	Enhancers	chr3	79082029	79082298	-	0	0	intergenic	79082030	79082298	+	OUT	-22000
C1909	Induced	Promoters	chr3	79090220	79091627	-	0	0	intergenic	79090221	79091627	+	OUT	-22000
C1910	Repressed	Enhancers	chr3	81787387	81787726	0	0	0	uc008poo.1	81762335	81779650	-	promoter	-7907
C1911	Repressed	Enhancers	chr3	82598039	82598291	0	0	0	intergenic	82598040	82598291	+	OUT	-22000
C1912	Repressed	Enhancers	chr3	82604322	82604671	0	0	0	intergenic	82604323	82604671	+	OUT	-22000
C1913	Constitutive	Enhancers	chr3	83648724	83649123	0	0	0	uc008ppn.1	83640193	83645689	-	promoter	-3235
C1914	Constitutive	Enhancers	chr3	83666676	83667582	0	0	0	intergenic	83666677	83667582	+	OUT	-22000
C1915	Constitutive	Enhancers	chr3	87134513	87134882	0	0	0	intergenic	87134514	87134882	+	OUT	-22000
C1916	Repressed	Enhancers	chr3	87137411	87139577	0	0	0	intergenic	87137412	87139577	+	OUT	-22000
C1917	Repressed	Enhancers	chr3	87140615	87142137	0	0	0	uc008psa.1	87161896	87174995	+	promoter	-20519
C1918	Induced	Enhancers	chr3	87315588	87317399	-	1	0	uc008psg.1	87329499	87334953	+	promoter	-13005
C1919	Induced	Enhancers	chr3	87318705	87319290	-	0	0	uc008psg.1	87329499	87334953	+	promoter	-10501
C1920	Constitutive	Promoters	chr3	87320241	87320567	0	0	0	uc008psg.1	87329499	87334953	+	promoter	-9094
C1921	Constitutive	Enhancers	chr3	87325292	87326104	0	0	0	uc008psg.1	87329499	87334953	+	promoter	-3800
C1922	Repressed	Enhancers	chr3	88410756	88410953	0	0	0	uc008pvu.1	88420064	88446548	+	promoter	-9209
C1923	Constitutive	Enhancers	chr3	89599969	89600678	0	0	0	intergenic	89599970	89600678	+	OUT	-22000
C1924	Repressed	Enhancers	chr3	90391628	90393852	0	1	0	uc008qcy.1	90404136	90406624	+	promoter	-11395
C1925	Constitutive	Enhancers	chr3	93309898	93310252	0	0	0	uc008qfj.1	93324417	93330210	+	promoter	-14341
C1926	Induced	Promoters	chr3	93356149	93357010	-	0	0	uc008qfk.1	93359038	93368567	+	promoter	-2458
C1927	Repressed	Enhancers	chr3	94391721	94392401	0	0	0	uc008qgr.1	94301465	94386624	-	promoter	-5437
C1928	Induced	Promoters	chr3	95506094	95506530	-	0	0	uc008qkm.1	95480126	95491781	-	promoter	-14531
C1929	Repressed	Enhancers	chr3	95781234	95782605	0	0	0	uc008qlw.1	95789432	95790890	+	promoter	-7512
C1930	Induced	Enhancers	chr3	96103905	96107011	-	1	0	uc008qmr.1	96086831	96097892	-	promoter	-7566
C1931	Constitutive	Enhancers	chr3	97798162	97798938	0	0	0	uc008qpn.1	97817460	97904582	+	promoter	-18909
C1932	Induced	Promoters	chr3	100496267	100496858	-	0	0	uc008qqw.1	100370339	100489150	-	promoter	-7413
C1933	Induced	Enhancers	chr3	101419781	101420187	-	0	0	uc008qrj.1	101380145	101408580	-	promoter	-11404
C1934	Repressed	Enhancers	chr3	101515761	101516089	0	0	0	intergenic	101515762	101516089	+	OUT	-22000
C1935	Repressed	Enhancers	chr3	101603843	101604254	0	0	0	intergenic	101603844	101604254	+	OUT	-22000
C1936	Repressed	Promoters	chr3	102519070	102519651	0	0	0	uc008qrw.1	102538692	102576215	+	promoter	-19331
C1937	Repressed	Promoters	chr3	102821225	102821689	0	0	0	uc008qsg.1	102824553	102862102	+	promoter	-3095
C1938	Repressed	Enhancers	chr3	103182247	103182441	0	0	0	intergenic	103182248	103182441	+	OUT	-22000
C1939	Repressed	Enhancers	chr3	104245771	104246143	0	0	0	intergenic	104245772	104246143	+	OUT	-22000
C1940	Induced	Promoters	chr3	104770858	104771206	-	0	0	uc008qut.1	104747722	104764627	-	promoter	-6405
C1941	Induced	Enhancers	chr3	106675752	106676159	-	0	0	intergenic	106675753	106676159	+	OUT	-22000
C1942	Induced	Enhancers	chr3	107578626	107581242	-	0	0	uc008qxk.1	107543977	107563387	-	promoter	-16547
C1943	Induced	Enhancers	chr3	108529171	108529711	-	0	0	uc008qzo.1	108481555	108525061	-	promoter	-4380
C1944	Induced	Enhancers	chr3	108854210	108854864	-	0	0	intergenic	108854211	108854864	+	OUT	-22000
C1945	Repressed	Enhancers	chr3	109054798	109059294	0	0	0	intergenic	109054799	109059294	+	OUT	-22000
C1946	Repressed	Enhancers	chr3	115385294	115387596	0	0	0	intergenic	115385295	115387596	+	OUT	-22000
C1947	Repressed	Enhancers	chr3	115389954	115393226	0	0	0	intergenic	115389955	115393226	+	OUT	-22000
C1948	Repressed	Enhancers	chr3	115395334	115399605	0	0	1	intergenic	115395335	115399605	+	OUT	-22000
C1949	Repressed	Enhancers	chr3	115518952	115519189	0	0	0	intergenic	115518953	115519189	+	OUT	-22000
C1950	Constitutive	Enhancers	chr3	115888126	115888380	0	0	0	intergenic	115888127	115888380	+	OUT	-22000
C1951	Induced	Enhancers	chr3	116139769	116140318	-	0	0	uc008rca.1	115975470	116126950	-	promoter	-13094
C1952	Repressed	Promoters	chr3	116538784	116539195	0	0	0	intergenic	116538785	116539195	+	OUT	-22000
C1953	Repressed	Promoters	chr3	116547687	116547905	0	0	0	uc008rcv.1	116562495	116606445	+	promoter	-14698
C1954	Repressed	Enhancers	chr3	116550972	116552328	2	0	0	uc008rcv.1	116562495	116606445	+	promoter	-10844
C1955	Repressed	Enhancers	chr3	121250832	121251246	0	0	0	uc008rdz.1	121162445	121235249	-	promoter	-15790
C1956	Constitutive	Enhancers	chr3	121593654	121593982	0	0	0	intergenic	121593655	121593982	+	OUT	-22000
C1957	Repressed	Enhancers	chr3	122004370	122004750	0	0	0	intergenic	122004371	122004750	+	OUT	-22000
C1958	Repressed	Enhancers	chr3	122043617	122043800	0	0	0	intergenic	122043618	122043800	+	OUT	-22000
C1959	Repressed	Enhancers	chr3	122046388	122046748	0	0	0	intergenic	122046389	122046748	+	OUT	-22000
C1960	Repressed	Enhancers	chr3	122051576	122051822	0	0	0	intergenic	122051577	122051822	+	OUT	-22000
C1961	Repressed	Enhancers	chr3	122074582	122075850	0	0	0	intergenic	122074583	122075850	+	OUT	-22000
C1962	Repressed	Enhancers	chr3	122080399	122082009	0	0	0	intergenic	122080400	122082009	+	OUT	-22000
C1963	Constitutive	Enhancers	chr3	122111415	122112219	0	0	0	uc008req.1	122122744	122233100	+	promoter	-10926
C1964	Repressed	Enhancers	chr3	122332452	122332725	0	0	0	uc008res.1	122272531	122322585	-	promoter	-10004
C1965	Induced	Enhancers	chr3	129775822	129776443	-	1	0	uc008rit.1	129686102	129763825	-	promoter	-12308
C1966	Repressed	Promoters	chr3	130576865	130577360	0	0	0	intergenic	130576866	130577360	+	OUT	-22000
C1967	Repressed	Enhancers	chr3	130581781	130581994	0	0	0	intergenic	130581782	130581994	+	OUT	-22000
C1968	Constitutive	Enhancers	chr3	130602945	130603285	0	0	0	intergenic	130602946	130603285	+	OUT	-22000
C1969	Constitutive	Promoters	chr3	131152707	131153672	0	0	0	intergenic	131152708	131153672	+	OUT	-22000
C1970	Repressed	Enhancers	chr3	133286311	133286783	0	0	0	intergenic	133286312	133286783	+	OUT	-22000
C1971	Induced	Enhancers	chr3	135381066	135381297	-	0	0	intergenic	135381067	135381297	+	OUT	-22000
C1972	Induced	Enhancers	chr3	137483621	137484022	-	0	0	intergenic	137483622	137484022	+	OUT	-22000
C1973	Repressed	Enhancers	chr3	138157478	138157741	0	0	0	uc008rnl.1	138121923	138152346	-	promoter	-5264
C1974	Repressed	Enhancers	chr3	138182036	138182472	0	0	0	uc008rnn.1	138189154	138220563	+	promoter	-6899
C1975	Repressed	Enhancers	chr3	138184016	138184611	0	0	0	uc008rnn.1	138189154	138220563	+	promoter	-4840
C1976	Induced	Enhancers	chr3	143800289	143802318	-	0	0	uc008rpk.1	143766568	143798718	-	promoter	-2586
C1977	Constitutive	Enhancers	chr3	144290817	144292132	0	0	0	intergenic	144290818	144292132	+	OUT	-22000
C1978	Induced	Enhancers	chr3	144332371	144332928	-	0	0	intergenic	144332372	144332928	+	OUT	-22000
C1979	Induced	Enhancers	chr3	144765134	144765438	-	0	0	uc008rqg.1	144733228	144762005	-	promoter	-3281
C1980	Induced	Enhancers	chr3	144766707	144767054	-	0	0	uc008rqg.1	144733228	144762005	-	promoter	-4876
C1981	Induced	Promoters	chr3	144768115	144768565	-	0	0	uc008rqg.1	144733228	144762005	-	promoter	-6335
C1982	Repressed	Enhancers	chr3	145626952	145627202	0	0	0	intergenic	145626953	145627202	+	OUT	-22000
C1983	Induced	Promoters	chr3	145991697	145992045	-	0	0	intergenic	145991698	145992045	+	OUT	-22000
C1984	Constitutive	Promoters	chr3	148715469	148715943	0	0	0	intergenic	148715470	148715943	+	OUT	-22000
C1985	Repressed	Enhancers	chr3	148883365	148883625	0	0	0	intergenic	148883366	148883625	+	OUT	-22000
C1986	Repressed	Enhancers	chr4	3553969	3554910	0	0	0	intergenic	3553970	3554910	+	OUT	-22000
C1987	Constitutive	Enhancers	chr4	3575513	3577004	0	0	0	uc008rwj.1	3583659	3590255	+	promoter	-7400
C1988	Constitutive	Promoters	chr4	3802013	3802593	0	0	0	uc008rwo.1	3797804	3799252	-	promoter	-3051
C1989	Constitutive	Promoters	chr4	6275468	6283842	4	0	0	uc008rxl.1	6292826	6301275	+	promoter	-13170
C1990	Induced	Promoters	chr4	8574003	8575050	-	0	0	intergenic	8574004	8575050	+	OUT	-22000
C1991	Constitutive	Promoters	chr4	8837385	8840562	0	0	0	intergenic	8837386	8840562	+	OUT	-22000
C1992	Constitutive	Enhancers	chr4	8844204	8844729	0	0	0	intergenic	8844205	8844729	+	OUT	-22000
C1993	Induced	Enhancers	chr4	8936411	8938089	-	0	0	intergenic	8936412	8938089	+	OUT	-22000
C1994	Induced	Enhancers	chr4	8942699	8943159	-	0	0	intergenic	8942700	8943159	+	OUT	-22000
C1995	Induced	Promoters	chr4	8954992	8955981	-	0	0	intergenic	8954993	8955981	+	OUT	-22000
C1996	Repressed	Enhancers	chr4	9043144	9043353	0	0	0	intergenic	9043145	9043353	+	OUT	-22000
C1997	Repressed	Enhancers	chr4	9609614	9610193	0	0	0	uc008ryh.1	9376231	9596491	-	promoter	-13413
C1998	Induced	Enhancers	chr4	10850302	10850904	-	0	0	intergenic	10850303	10850904	+	OUT	-22000
C1999	Induced	Enhancers	chr4	10879758	10879953	-	0	0	intergenic	10879759	10879953	+	OUT	-22000
[truncated: 1,016 more rows]

## Sheet: Predictions
ID	Chromosome	Start	End	SVM score*	PolII class	Prediction class		* Positive scores denote enhancer prediction
P1	chr1	10870073	10870354	-0.120409	Constitutive	Promoters		* Negative scores denote promoter prediction
P2	chr1	13413791	13414080	-0.750513	Repressed	Promoters
P3	chr1	13416463	13417017	2.16097	Repressed	Enhancers
P4	chr1	13503883	13504378	-8.02093	Constitutive	Promoters
P5	chr1	16151467	16151622	-1.57278	Inducible	Promoters
P6	chr1	23406384	23406830	-2.20917	Inducible	Promoters
P7	chr1	31106931	31107113	9.75533	Repressed	Enhancers
P8	chr1	34445703	34446179	15.9587	Repressed	Enhancers
P9	chr1	34446267	34446844	15.7953	Repressed	Enhancers
P10	chr1	36360130	36360472	8.58424	Inducible	Enhancers
P11	chr1	36503035	36503912	-75.8813	Repressed	Promoters
P12	chr1	37004317	37004550	-0.253563	Inducible	Promoters
P13	chr1	37043186	37044117	3.61545	Inducible	Enhancers
P14	chr1	37044137	37044682	0.0219897	Inducible	Enhancers
P15	chr1	37044976	37045219	3.47806	Inducible	Enhancers
P16	chr1	37045222	37045383	4.62482	Inducible	Enhancers
P17	chr1	37057245	37057868	2.64346	Inducible	Enhancers
P18	chr1	39539079	39539391	16.366	Repressed	Enhancers
P19	chr1	39550003	39550435	0.0327206	Constitutive	Enhancers
P20	chr1	39559863	39560272	7.57717	Repressed	Enhancers
P21	chr1	39659515	39659772	10.0445	Repressed	Enhancers
P22	chr1	39660448	39660664	5.28779	Repressed	Enhancers
P23	chr1	39791105	39791528	8.97001	Repressed	Enhancers
P24	chr1	39818150	39818372	-0.190859	Repressed	Promoters
P25	chr1	40449703	40449978	14.0247	Repressed	Enhancers
P26	chr1	40461693	40461907	6.82467	Repressed	Enhancers
P27	chr1	45925782	45926046	18.112	Repressed	Enhancers
P28	chr1	45938897	45939124	2.77277	Repressed	Enhancers
P29	chr1	46930428	46931045	7.06539	Repressed	Enhancers
P30	chr1	55863853	55864337	14.3672	Constitutive	Enhancers
P31	chr1	58830141	58830475	8.28175	Constitutive	Enhancers
P32	chr1	59515744	59516055	8.04495	Constitutive	Enhancers
P33	chr1	60684121	60684656	22.7771	Repressed	Enhancers
P34	chr1	60684744	60684962	0.332227	Repressed	Enhancers
P35	chr1	62725134	62725879	9.766	Repressed	Enhancers
P36	chr1	64235935	64236668	16.025	Repressed	Enhancers
P37	chr1	64238337	64240049	25.5962	Repressed	Enhancers
P38	chr1	64342108	64342561	11.8667	Constitutive	Enhancers
P39	chr1	64349134	64350010	-5.88671	Constitutive	Promoters
P40	chr1	64350432	64353049	1.34282	Constitutive	Enhancers
P41	chr1	64385071	64385299	12.8012	Repressed	Enhancers
P42	chr1	64420322	64420747	1.3033	Repressed	Enhancers
P43	chr1	64420778	64421203	7.1102	Repressed	Enhancers
P44	chr1	64421263	64421706	12.9102	Repressed	Enhancers
P45	chr1	64421889	64422536	10.665	Repressed	Enhancers
P46	chr1	72272835	72274065	-10.493	Repressed	Promoters
P47	chr1	72274130	72275038	8.06957	Repressed	Enhancers
P48	chr1	72283648	72284288	-27.2541	Repressed	Promoters
P49	chr1	72284308	72285251	-2.28824	Repressed	Promoters
P50	chr1	74247503	74247862	6.20049	Repressed	Enhancers
P51	chr1	74273790	74274323	5.01665	Constitutive	Enhancers
P52	chr1	74863274	74864178	-20.5602	Constitutive	Promoters
P53	chr1	80450504	80450733	5.2621	Inducible	Enhancers
P54	chr1	82794657	82795756	10.2984	Constitutive	Enhancers
P55	chr1	82828345	82829288	8.35245	Constitutive	Enhancers
P56	chr1	84344747	84344961	8.98399	Repressed	Enhancers
P57	chr1	84345810	84347187	-1.29168	Repressed	Promoters
P58	chr1	84347214	84347454	4.5639	Repressed	Enhancers
P59	chr1	84356178	84356385	17.5255	Repressed	Enhancers
P60	chr1	88313706	88313944	6.90019	Inducible	Enhancers
P61	chr1	88337707	88339937	-57.7404	Constitutive	Promoters
P62	chr1	88367052	88368008	11.0805	Constitutive	Enhancers
P63	chr1	88368498	88369709	11.6257	Inducible	Enhancers
P64	chr1	88383628	88385077	-79.5222	Inducible	Promoters
P65	chr1	88388561	88389616	18.2702	Constitutive	Enhancers
P66	chr1	88399842	88401406	-13.3221	Constitutive	Promoters
P67	chr1	89076627	89078441	11.7353	Repressed	Enhancers
P68	chr1	89078455	89079029	7.98267	Repressed	Enhancers
P69	chr1	90183982	90184200	-2.95324	Inducible	Promoters
P70	chr1	90371012	90371192	15.8981	Repressed	Enhancers
P71	chr1	90371339	90371727	16.8498	Repressed	Enhancers
P72	chr1	90471997	90473349	5.67328	Constitutive	Enhancers
P73	chr1	90483441	90484649	20.8999	Repressed	Enhancers
P74	chr1	90484670	90485287	8.21334	Repressed	Enhancers
P75	chr1	90533293	90533616	22.432	Repressed	Enhancers
P76	chr1	90539442	90539645	11.4638	Repressed	Enhancers
P77	chr1	90549369	90549704	28.2341	Repressed	Enhancers
P78	chr1	90551297	90551659	22.4041	Repressed	Enhancers
P79	chr1	90551797	90552040	18.3868	Repressed	Enhancers
P80	chr1	90552070	90552341	40.1417	Repressed	Enhancers
P81	chr1	90557837	90558009	11.0443	Repressed	Enhancers
P82	chr1	90912037	90912307	-7.30099	Inducible	Promoters
P83	chr1	90937964	90938216	0.776429	Inducible	Enhancers
P84	chr1	94111953	94112339	13.9472	Repressed	Enhancers
P85	chr1	94112978	94113667	4.60032	Repressed	Enhancers
P86	chr1	94671351	94671791	-0.385005	Inducible	Promoters
P87	chr1	95061972	95062233	6.21723	Inducible	Enhancers
P88	chr1	97277001	97277782	8.19828	Constitutive	Enhancers
P89	chr1	103798445	103799349	-18.2466	Repressed	Promoters
P90	chr1	107760187	107760527	7.40958	Inducible	Enhancers
P91	chr1	107760804	107761567	9.98871	Inducible	Enhancers
P92	chr1	107762065	107762571	9.7786	Inducible	Enhancers
P93	chr1	107763312	107763511	10.7647	Inducible	Enhancers
P94	chr1	107802921	107803207	4.35001	Inducible	Enhancers
P95	chr1	107818489	107818935	-2.12746	Inducible	Promoters
P96	chr1	107819648	107819967	1.24574	Inducible	Enhancers
P97	chr1	107821407	107822350	12.7279	Inducible	Enhancers
P98	chr1	107823016	107823251	5.58648	Inducible	Enhancers
P99	chr1	107845041	107845425	0.404085	Inducible	Enhancers
P100	chr1	107861425	107862119	4.84803	Inducible	Enhancers
P101	chr1	107867699	107869320	-10.6291	Inducible	Promoters
P102	chr1	107877279	107878274	7.82513	Inducible	Enhancers
P103	chr1	107879090	107879953	17.2504	Inducible	Enhancers
P104	chr1	107880007	107881072	2.96676	Inducible	Enhancers
P105	chr1	108304588	108304851	14.6662	Repressed	Enhancers
P106	chr1	108828145	108828365	13.8235	Repressed	Enhancers
P107	chr1	108828588	108828789	10.0271	Repressed	Enhancers
P108	chr1	108828847	108829288	12.9216	Repressed	Enhancers
P109	chr1	109393575	109393866	7.43982	Repressed	Enhancers
P110	chr1	109394555	109394770	9.45438	Repressed	Enhancers
P111	chr1	109480544	109480764	5.72096	Repressed	Enhancers
P112	chr1	121996201	121996411	13.3298	Repressed	Enhancers
P113	chr1	122429268	122429612	4.72912	Constitutive	Enhancers
P114	chr1	127338134	127338752	12.2184	Constitutive	Enhancers
P115	chr1	127362936	127363209	6.36005	Repressed	Enhancers
P116	chr1	127363230	127363857	10.6925	Repressed	Enhancers
P117	chr1	127369881	127370105	14.8197	Repressed	Enhancers
P118	chr1	127370730	127370959	15.6237	Repressed	Enhancers
P119	chr1	129032304	129032493	0.447023	Repressed	Enhancers
P120	chr1	129733330	129733560	3.76763	Repressed	Enhancers
P121	chr1	130443739	130443956	-1.25335	Inducible	Promoters
P122	chr1	130446062	130446282	7.81547	Inducible	Enhancers
P123	chr1	130609371	130609703	8.11118	Repressed	Enhancers
P124	chr1	130621279	130621418	22.3526	Repressed	Enhancers
P125	chr1	130643266	130643571	8.691	Repressed	Enhancers
P126	chr1	130643897	130644269	15.8426	Repressed	Enhancers
P127	chr1	133457315	133457658	3.62237	Repressed	Enhancers
P128	chr1	135244324	135244585	1.12939	Inducible	Enhancers
P129	chr1	135957244	135957750	2.18616	Constitutive	Enhancers
P130	chr1	135991085	135992337	20.5002	Repressed	Enhancers
P131	chr1	135995158	135996318	-0.654266	Repressed	Promoters
P132	chr1	137595828	137596225	-3.35701	Repressed	Promoters
P133	chr1	138466899	138467115	-1.12835	Inducible	Promoters
P134	chr1	138467118	138467342	-2.46783	Inducible	Promoters
P135	chr1	138474402	138475699	-11.2644	Inducible	Promoters
P136	chr1	138475961	138476367	-10.42	Inducible	Promoters
P137	chr1	138476842	138477137	15.6964	Inducible	Enhancers
P138	chr1	138478063	138478288	12.7308	Inducible	Enhancers
P139	chr1	138505559	138505872	14.0586	Inducible	Enhancers
P140	chr1	138580986	138581547	-4.63604	Inducible	Promoters
P141	chr1	138581698	138582079	-2.77222	Inducible	Promoters
P142	chr1	138582161	138582710	-1.18788	Inducible	Promoters
P143	chr1	138583158	138583492	25.1209	Inducible	Enhancers
P144	chr1	139648110	139648673	1.38083	Repressed	Enhancers
P145	chr1	139794754	139795411	-76.2899	Inducible	Promoters
P146	chr1	139795945	139796117	-81.8156	Inducible	Promoters
P147	chr1	140140516	140141014	-3.32603	Inducible	Promoters
P148	chr1	140141081	140141395	1.69272	Constitutive	Enhancers
P149	chr1	140219631	140220143	-0.354681	Inducible	Promoters
P150	chr1	145763728	145764568	4.32368	Repressed	Enhancers
P151	chr1	145764583	145765173	18.9885	Repressed	Enhancers
P152	chr1	145765221	145765737	10.1724	Repressed	Enhancers
P153	chr1	146047475	146047717	2.08985	Repressed	Enhancers
P154	chr1	146049539	146049931	4.07071	Repressed	Enhancers
P155	chr1	146050074	146050596	13.0334	Repressed	Enhancers
P156	chr1	146050726	146051406	11.393	Repressed	Enhancers
P157	chr1	146052449	146052666	5.64179	Repressed	Enhancers
P158	chr1	146052897	146053123	10.0895	Repressed	Enhancers
P159	chr1	146189757	146189960	5.71291	Repressed	Enhancers
P160	chr1	152012156	152012420	4.48497	Constitutive	Enhancers
P161	chr1	152343913	152344234	2.33084	Inducible	Enhancers
P162	chr1	152872361	152872734	-0.951325	Repressed	Promoters
P163	chr1	153092424	153092746	3.6267	Repressed	Enhancers
P164	chr1	153093360	153093531	8.75762	Repressed	Enhancers
P165	chr1	153097756	153098392	-1.27181	Repressed	Promoters
P166	chr1	153134558	153135054	9.39274	Repressed	Enhancers
P167	chr1	154644426	154644642	21.5267	Repressed	Enhancers
P168	chr1	154645318	154645681	18.7951	Repressed	Enhancers
P169	chr1	154646997	154647350	17.2188	Repressed	Enhancers
P170	chr1	156875928	156876256	5.5203	Repressed	Enhancers
P171	chr1	156897240	156898765	28.2535	Repressed	Enhancers
P172	chr1	158916776	158917006	3.42656	Repressed	Enhancers
P173	chr1	158944340	158944565	6.04665	Inducible	Enhancers
P174	chr1	161971493	161971808	4.95671	Inducible	Enhancers
P175	chr1	164439976	164440186	2.90058	Repressed	Enhancers
P176	chr1	164495055	164495294	22.3657	Repressed	Enhancers
P177	chr1	164495328	164495688	15.0382	Repressed	Enhancers
P178	chr1	167667725	167667950	14.2075	Repressed	Enhancers
P179	chr1	168359774	168360273	-7.06129	Constitutive	Promoters
P180	chr1	168723297	168723685	13.279	Repressed	Enhancers
P181	chr1	172826807	172827046	2.03709	Inducible	Enhancers
P182	chr1	172927993	172929304	4.01943	Constitutive	Enhancers
P183	chr1	172936907	172937216	-0.322106	Inducible	Promoters
P184	chr1	172946981	172947722	10.7257	Inducible	Enhancers
P185	chr1	172947764	172948518	24.5052	Inducible	Enhancers
P186	chr1	173043758	173044611	17.6818	Inducible	Enhancers
P187	chr1	173429986	173433588	5.47617	Repressed	Enhancers
P188	chr1	173546218	173546778	13.9241	Inducible	Enhancers
P189	chr1	173546904	173548461	27.6274	Constitutive	Enhancers
P190	chr1	173549033	173550636	11.7572	Constitutive	Enhancers
P191	chr1	173587966	173588822	21.8686	Constitutive	Enhancers
P192	chr1	173692223	173692513	0.58052	Inducible	Enhancers
P193	chr1	173692541	173692705	1.52768	Inducible	Enhancers
P194	chr1	173692992	173693226	1.92899	Inducible	Enhancers
P195	chr1	174353346	174353682	4.31082	Repressed	Enhancers
P196	chr1	174353725	174353950	3.26354	Repressed	Enhancers
P197	chr1	174381175	174381757	5.30934	Repressed	Enhancers
P198	chr1	174385631	174386682	4.04016	Constitutive	Enhancers
P199	chr1	175968843	175969050	8.25076	Inducible	Enhancers
P200	chr1	175970657	175970988	3.18064	Inducible	Enhancers
P201	chr1	175971245	175971426	3.54063	Inducible	Enhancers
P202	chr1	179187274	179190881	-25.8005	Inducible	Promoters
P203	chr1	179191053	179191369	-2.58835	Inducible	Promoters
P204	chr1	179573831	179574262	19.691	Inducible	Enhancers
P205	chr1	179632127	179632983	4.70831	Repressed	Enhancers
P206	chr1	179633437	179633734	0.0226259	Repressed	Enhancers
P207	chr1	179641261	179642016	13.1078	Repressed	Enhancers
P208	chr1	179644278	179644761	9.44042	Repressed	Enhancers
P209	chr1	179913071	179913489	-12.435	Constitutive	Promoters
P210	chr1	180298778	180299855	-21.6467	Repressed	Promoters
P211	chr1	182223085	182223357	7.84683	Inducible	Enhancers
P212	chr1	182223377	182223684	1.39545	Inducible	Enhancers
P213	chr1	182223942	182224322	4.59416	Inducible	Enhancers
P214	chr1	182224476	182224668	2.47654	Inducible	Enhancers
P215	chr1	182232416	182233914	27.0184	Constitutive	Enhancers
P216	chr1	182242136	182242419	20.6043	Inducible	Enhancers
P217	chr1	182242977	182243206	15.0716	Inducible	Enhancers
P218	chr1	182243306	182243555	25.7917	Inducible	Enhancers
P219	chr1	182244759	182245246	20.7307	Inducible	Enhancers
P220	chr1	182696653	182697200	0.992361	Constitutive	Enhancers
P221	chr1	182698181	182699036	-11.7583	Constitutive	Promoters
P222	chr1	182701692	182702251	12.8352	Constitutive	Enhancers
P223	chr1	182707523	182708791	-15.8724	Constitutive	Promoters
P224	chr1	182759789	182760373	0.689013	Constitutive	Enhancers
P225	chr1	182765206	182765755	5.35849	Repressed	Enhancers
P226	chr1	182777995	182779743	-9.56052	Repressed	Promoters
P227	chr1	182818695	182819091	19.8147	Repressed	Enhancers
P228	chr1	182852400	182852639	10.9149	Repressed	Enhancers
P229	chr1	183160749	183161375	17.7476	Repressed	Enhancers
P230	chr1	183161395	183161836	5.60904	Repressed	Enhancers
P231	chr1	183161863	183163158	2.69862	Repressed	Enhancers
P232	chr1	183163325	183164937	13.7843	Repressed	Enhancers
P233	chr1	183175982	183178137	7.52586	Constitutive	Enhancers
P234	chr1	183186315	183188245	-5.58061	Repressed	Promoters
P235	chr1	183483247	183483518	26.9075	Repressed	Enhancers
P236	chr1	183790555	183791090	7.63413	Constitutive	Enhancers
P237	chr1	184038494	184039005	12.0197	Repressed	Enhancers
P238	chr1	184450224	184450689	3.35012	Constitutive	Enhancers
P239	chr1	184457281	184457781	7.46152	Constitutive	Enhancers
P240	chr1	184457843	184458995	4.58237	Repressed	Enhancers
P241	chr1	184838452	184838767	13.3795	Repressed	Enhancers
P242	chr1	184858125	184858345	-27.5736	Repressed	Promoters
P243	chr1	184858447	184858922	-20.0656	Repressed	Promoters
P244	chr1	185803685	185804034	5.88953	Repressed	Enhancers
P245	chr1	186181723	186182202	11.5421	Repressed	Enhancers
P246	chr1	186264039	186264255	12.8979	Repressed	Enhancers
P247	chr1	186264954	186265205	23.8558	Repressed	Enhancers
P248	chr1	186265293	186265536	20.5947	Repressed	Enhancers
P249	chr1	186266095	186266301	21.3607	Repressed	Enhancers
P250	chr1	186358700	186359542	20.3873	Repressed	Enhancers
P251	chr1	186359550	186360302	23.6408	Repressed	Enhancers
P252	chr1	186438770	186439353	9.82	Repressed	Enhancers
P253	chr1	186440099	186440307	1.76586	Repressed	Enhancers
P254	chr1	186441664	186441862	6.94343	Repressed	Enhancers
P255	chr1	186441877	186442161	2.33001	Repressed	Enhancers
P256	chr1	186675585	186676356	11.3793	Constitutive	Enhancers
P257	chr1	187028962	187029602	-18.4768	Repressed	Promoters
P258	chr1	187031700	187032548	-22.6408	Repressed	Promoters
P259	chr1	187033570	187033977	-2.78479	Repressed	Promoters
P260	chr1	187040661	187041035	4.4868	Constitutive	Enhancers
P261	chr1	187053832	187054080	16.1351	Repressed	Enhancers
P262	chr1	187057049	187057281	-0.660072	Constitutive	Promoters
P263	chr1	187065182	187065614	1.08698	Constitutive	Enhancers
P264	chr1	192919381	192919588	-2.77696	Inducible	Promoters
P265	chr1	192948219	192949245	17.8792	Inducible	Enhancers
P266	chr1	192949699	192950049	14.1798	Inducible	Enhancers
P267	chr1	193013907	193014207	6.27784	Inducible	Enhancers
P268	chr1	193017767	193018912	9.5476	Inducible	Enhancers
P269	chr1	193021849	193023253	20.9683	Repressed	Enhancers
P270	chr1	193024425	193025505	22.1499	Repressed	Enhancers
P271	chr1	193073922	193074321	42.3824	Repressed	Enhancers
P272	chr1	193074557	193074942	28.2466	Repressed	Enhancers
P273	chr1	193077520	193077868	25.8992	Repressed	Enhancers
P274	chr1	193078184	193078711	15.0735	Repressed	Enhancers
P275	chr1	193082708	193083049	14.0653	Repressed	Enhancers
P276	chr1	193092202	193093071	21.1314	Repressed	Enhancers
P277	chr1	193093074	193094329	21.6389	Repressed	Enhancers
P278	chr1	193094484	193094862	11.9336	Repressed	Enhancers
P279	chr1	193094877	193095502	21.7919	Repressed	Enhancers
P280	chr1	193105228	193105569	31.8063	Repressed	Enhancers
P281	chr1	193245429	193246266	27.8671	Constitutive	Enhancers
P282	chr1	193262227	193262991	12.2294	Inducible	Enhancers
P283	chr1	193263000	193263233	9.54774	Inducible	Enhancers
P284	chr1	193263711	193263932	10.9385	Inducible	Enhancers
P285	chr1	193266363	193266857	-2.14594	Inducible	Promoters
P286	chr1	193268868	193269087	3.87728	Inducible	Enhancers
P287	chr1	193269136	193269482	15.4629	Inducible	Enhancers
P288	chr1	193269815	193270082	8.06624	Inducible	Enhancers
P289	chr1	193271418	193271760	7.37103	Inducible	Enhancers
P290	chr1	193673192	193673680	-0.341503	Inducible	Promoters
P291	chr1	193701955	193702258	25.2805	Inducible	Enhancers
P292	chr1	193778897	193779510	17.3271	Constitutive	Enhancers
P293	chr1	193780005	193780985	20.4996	Constitutive	Enhancers
P294	chr1	196802210	196804091	-63.8748	Inducible	Promoters
P295	chr1	196821196	196821952	17.9492	Constitutive	Enhancers
P296	chr10	5074012	5074347	3.49061	Inducible	Enhancers
P297	chr10	5137769	5137977	-1.3171	Repressed	Promoters
P298	chr10	5138059	5138544	2.85211	Repressed	Enhancers
P299	chr10	5138820	5139059	9.39525	Repressed	Enhancers
P300	chr10	7608186	7608480	-1.79477	Constitutive	Promoters
P301	chr10	7785741	7785950	7.17065	Repressed	Enhancers
P302	chr10	8635349	8635945	0.96735	Inducible	Enhancers
P303	chr10	8645125	8645500	11.2289	Repressed	Enhancers
P304	chr10	8645957	8646344	-2.13295	Repressed	Promoters
P305	chr10	8664909	8665223	3.80578	Repressed	Enhancers
P306	chr10	9627845	9628248	5.61538	Inducible	Enhancers
P307	chr10	10041175	10041559	7.53674	Repressed	Enhancers
P308	chr10	12594424	12594736	-1.28434	Inducible	Promoters
P309	chr10	12594892	12595105	-2.71509	Inducible	Promoters
P310	chr10	13893952	13894124	4.50947	Inducible	Enhancers
P311	chr10	13895300	13895509	18.7443	Inducible	Enhancers
P312	chr10	13906217	13906756	17.5552	Constitutive	Enhancers
P313	chr10	13908754	13909196	20.8588	Inducible	Enhancers
P314	chr10	14264906	14265488	-47.212	Constitutive	Promoters
P315	chr10	14982154	14982309	-2.61642	Inducible	Promoters
P316	chr10	16921098	16921518	9.83051	Inducible	Enhancers
P317	chr10	17238255	17238470	2.87503	Inducible	Enhancers
P318	chr10	17492133	17492586	16.3587	Repressed	Enhancers
P319	chr10	17709083	17709357	-7.49329	Inducible	Promoters
P320	chr10	18038234	18038615	-31.2368	Inducible	Promoters
P321	chr10	18677655	18677830	-0.596995	Inducible	Promoters
P322	chr10	18679705	18680020	8.79352	Inducible	Enhancers
P323	chr10	18763522	18764135	-5.16552	Constitutive	Promoters
P324	chr10	18782233	18783367	-5.37103	Inducible	Promoters
P325	chr10	18788283	18788741	2.29965	Inducible	Enhancers
P326	chr10	19241936	19242288	5.24227	Repressed	Enhancers
P327	chr10	19411708	19411917	14.392	Repressed	Enhancers
P328	chr10	20489513	20489678	1.05902	Inducible	Enhancers
P329	chr10	20492020	20492344	2.56906	Inducible	Enhancers
P330	chr10	21285545	21285768	13.7528	Repressed	Enhancers
P331	chr10	21496862	21497076	9.44515	Inducible	Enhancers
P332	chr10	21546453	21546976	-1.67689	Inducible	Promoters
P333	chr10	21547113	21547606	1.96587	Inducible	Enhancers
P334	chr10	21559074	21559382	3.69477	Inducible	Enhancers
P335	chr10	21559615	21559902	2.73993	Inducible	Enhancers
P336	chr10	21778558	21778816	-9.17781	Inducible	Promoters
P337	chr10	22467030	22467195	14.433	Repressed	Enhancers
P338	chr10	22796817	22797169	-5.78997	Constitutive	Promoters
P339	chr10	24649903	24650347	14.1025	Repressed	Enhancers
P340	chr10	24847608	24847893	-7.05861	Inducible	Promoters
P341	chr10	24848212	24848972	2.46602	Inducible	Enhancers
P342	chr10	25051728	25052057	-1.57184	Repressed	Promoters
P343	chr10	36832105	36832394	0.439551	Inducible	Enhancers
P344	chr10	36832512	36832778	3.28539	Inducible	Enhancers
P345	chr10	36909709	36910090	5.43781	Inducible	Enhancers
P346	chr10	36914071	36914280	12.9078	Inducible	Enhancers
P347	chr10	36951764	36952415	10.5545	Constitutive	Enhancers
P348	chr10	36954920	36955355	29.7866	Inducible	Enhancers
P349	chr10	37040191	37041344	14.7975	Inducible	Enhancers
P350	chr10	37056899	37057353	4.69444	Constitutive	Enhancers
P351	chr10	38891004	38891389	-14.4287	Repressed	Promoters
P352	chr10	38986732	38987126	4.55689	Constitutive	Enhancers
P353	chr10	39884705	39885086	-5.34923	Constitutive	Promoters
P354	chr10	39995834	39996178	8.25214	Repressed	Enhancers
P355	chr10	40245624	40245984	20.2319	Inducible	Enhancers
P356	chr10	41105558	41106002	2.81813	Repressed	Enhancers
P357	chr10	43387098	43388043	5.41625	Repressed	Enhancers
P358	chr10	43422872	43423092	16.28	Repressed	Enhancers
P359	chr10	43731182	43731437	2.52615	Constitutive	Enhancers
P360	chr10	43788870	43789273	5.51202	Repressed	Enhancers
P361	chr10	44318636	44319430	-10.0887	Inducible	Promoters
P362	chr10	44321387	44322121	21.3408	Inducible	Enhancers
P363	chr10	44350309	44351108	12.2369	Constitutive	Enhancers
P364	chr10	44405954	44406191	9.59765	Inducible	Enhancers
P365	chr10	44411341	44411853	9.53347	Constitutive	Enhancers
P366	chr10	44996292	44996625	-0.415551	Constitutive	Promoters
P367	chr10	44996674	44997129	4.39497	Constitutive	Enhancers
P368	chr10	51141840	51142209	1.91156	Constitutive	Enhancers
P369	chr10	51168765	51169085	-2.30796	Constitutive	Promoters
P370	chr10	51170085	51170425	-13.5334	Constitutive	Promoters
P371	chr10	51170689	51172660	-20.1755	Constitutive	Promoters
P372	chr10	51172714	51176689	-12.6427	Repressed	Promoters
P373	chr10	51245901	51247316	-52.288	Inducible	Promoters
P374	chr10	51247603	51249941	-23.5072	Inducible	Promoters
P375	chr10	51250664	51251054	4.70054	Inducible	Enhancers
P376	chr10	51251802	51252254	-1.55344	Inducible	Promoters
P377	chr10	53837504	53838070	22.1781	Repressed	Enhancers
P378	chr10	53838092	53839549	10.7317	Repressed	Enhancers
P379	chr10	56513101	56513387	10.2214	Inducible	Enhancers
P380	chr10	56599734	56599935	3.24581	Repressed	Enhancers
P381	chr10	59099364	59100191	-11.3229	Inducible	Promoters
P382	chr10	59395478	59395675	9.52902	Repressed	Enhancers
P383	chr10	59671278	59673055	19.7015	Repressed	Enhancers
P384	chr10	59673186	59673538	31.2828	Repressed	Enhancers
P385	chr10	59680334	59681132	-27.5196	Repressed	Promoters
P386	chr10	59715051	59715266	17.6035	Repressed	Enhancers
P387	chr10	59715282	59715755	18.3702	Repressed	Enhancers
P388	chr10	59722592	59724368	28.9839	Repressed	Enhancers
P389	chr10	59724415	59724749	32.9877	Repressed	Enhancers
P390	chr10	59724811	59725580	31.8847	Repressed	Enhancers
P391	chr10	59730934	59731140	19.7269	Repressed	Enhancers
P392	chr10	59731643	59732890	10.9171	Repressed	Enhancers
P393	chr10	59735820	59736936	12.8932	Repressed	Enhancers
P394	chr10	59737144	59737991	36.4554	Constitutive	Enhancers
P395	chr10	60420708	60421184	2.2506	Repressed	Enhancers
P396	chr10	60630083	60630712	6.05373	Repressed	Enhancers
P397	chr10	61528898	61529324	8.80144	Inducible	Enhancers
P398	chr10	62845077	62845622	-7.63027	Inducible	Promoters
P399	chr10	66310950	66311793	22.8753	Repressed	Enhancers
P400	chr10	66311861	66312206	12.2694	Repressed	Enhancers
P401	chr10	66312488	66312722	7.35062	Repressed	Enhancers
P402	chr10	66314327	66315312	19.7711	Repressed	Enhancers
P403	chr10	66315351	66315828	19.7111	Repressed	Enhancers
P404	chr10	66316091	66316561	5.22429	Repressed	Enhancers
P405	chr10	66316591	66316897	7.6599	Repressed	Enhancers
P406	chr10	66326751	66328629	-4.07383	Repressed	Promoters
P407	chr10	66328646	66329056	15.6003	Repressed	Enhancers
P408	chr10	66382207	66382469	9.42467	Repressed	Enhancers
P409	chr10	66382645	66383275	5.87301	Repressed	Enhancers
P410	chr10	66383444	66384027	11.2086	Repressed	Enhancers
P411	chr10	66384163	66384494	5.99363	Repressed	Enhancers
P412	chr10	66390473	66390645	-2.41611	Repressed	Promoters
P413	chr10	66391028	66392291	16.7443	Repressed	Enhancers
P414	chr10	66392399	66394610	8.86203	Repressed	Enhancers
P415	chr10	66394748	66395015	5.11782	Repressed	Enhancers
P416	chr10	66399706	66401204	5.75639	Repressed	Enhancers
P417	chr10	66401356	66401536	7.15887	Repressed	Enhancers
P418	chr10	66403264	66403603	4.84012	Repressed	Enhancers
P419	chr10	67109928	67111167	-22.0406	Constitutive	Promoters
P420	chr10	67745519	67746174	-0.535852	Inducible	Promoters
P421	chr10	70702369	70702689	-8.66899	Constitutive	Promoters
P422	chr10	70754008	70754198	-0.432149	Inducible	Promoters
P423	chr10	76631640	76631882	3.88187	Repressed	Enhancers
P424	chr10	76669637	76669932	11.9553	Repressed	Enhancers
P425	chr10	76673348	76674380	24.1582	Repressed	Enhancers
P426	chr10	76985867	76986615	11.7902	Constitutive	Enhancers
P427	chr10	77568345	77569104	0.778441	Inducible	Enhancers
P428	chr10	77569195	77569455	6.26665	Inducible	Enhancers
P429	chr10	77571008	77571193	-3.9346	Inducible	Promoters
P430	chr10	77592639	77592844	-1.31223	Inducible	Promoters
P431	chr10	77592891	77593251	3.8269	Inducible	Enhancers
P432	chr10	77593312	77593726	7.4074	Inducible	Enhancers
P433	chr10	77593801	77593988	2.80622	Inducible	Enhancers
P434	chr10	77598258	77599249	21.4275	Inducible	Enhancers
P435	chr10	77600020	77600933	26.462	Inducible	Enhancers
P436	chr10	77606492	77607111	3.53166	Inducible	Enhancers
P437	chr10	77933550	77934020	19.7304	Repressed	Enhancers
P438	chr10	77939426	77939879	3.49212	Repressed	Enhancers
P439	chr10	77943705	77943981	-17.4219	Repressed	Promoters
P440	chr10	77944106	77945224	-9.68182	Repressed	Promoters
P441	chr10	79303535	79303807	-11.3376	Constitutive	Promoters
P442	chr10	79304068	79304549	-17.1194	Constitutive	Promoters
P443	chr10	79312675	79313106	11.6075	Constitutive	Enhancers
P444	chr10	80214323	80214743	-0.15825	Repressed	Promoters
P445	chr10	80384480	80385298	-1.03027	Constitutive	Promoters
P446	chr10	80635945	80636284	-0.0734571	Constitutive	Promoters
P447	chr10	81545908	81546234	-8.12053	Constitutive	Promoters
P448	chr10	81640757	81641617	-28.3633	Constitutive	Promoters
P449	chr10	82243059	82243249	9.82804	Repressed	Enhancers
P450	chr10	82385972	82386180	20.7325	Repressed	Enhancers
P451	chr10	82386261	82386467	10.0167	Repressed	Enhancers
P452	chr10	82386873	82387090	15.8024	Repressed	Enhancers
P453	chr10	82806011	82806224	10.9912	Repressed	Enhancers
P454	chr10	82806256	82807135	6.90683	Repressed	Enhancers
P455	chr10	83523529	83523788	2.41982	Repressed	Enhancers
P456	chr10	83797593	83798128	1.2501	Repressed	Enhancers
P457	chr10	83801445	83801735	11.5369	Repressed	Enhancers
P458	chr10	84011891	84012175	-3.06221	Repressed	Promoters
P459	chr10	84012737	84012969	10.2819	Repressed	Enhancers
P460	chr10	87216540	87216696	4.02474	Inducible	Enhancers
P461	chr10	87268536	87268809	9.24973	Repressed	Enhancers
P462	chr10	87293334	87293834	19.7882	Repressed	Enhancers
P463	chr10	87293895	87294119	24.2249	Repressed	Enhancers
P464	chr10	87294311	87294574	19.6856	Repressed	Enhancers
P465	chr10	87295056	87295272	25.2307	Repressed	Enhancers
P466	chr10	87304825	87305056	9.45052	Repressed	Enhancers
P467	chr10	87835819	87836117	1.04515	Inducible	Enhancers
P468	chr10	90644060	90645740	-33.7448	Constitutive	Promoters
P469	chr10	90657877	90658291	3.60453	Inducible	Enhancers
P470	chr10	90668174	90669443	3.53596	Inducible	Enhancers
P471	chr10	90704440	90704785	3.58014	Inducible	Enhancers
P472	chr10	90705016	90705536	12.1436	Inducible	Enhancers
P473	chr10	90705578	90706525	3.70966	Inducible	Enhancers
P474	chr10	92558720	92558933	8.10441	Repressed	Enhancers
P475	chr10	92586971	92587242	10.9633	Repressed	Enhancers
P476	chr10	92827549	92827875	18.2274	Repressed	Enhancers
P477	chr10	92833265	92833645	16.7968	Repressed	Enhancers
P478	chr10	92837758	92838595	15.0677	Constitutive	Enhancers
P479	chr10	92838610	92838941	13.6234	Constitutive	Enhancers
P480	chr10	92893595	92893958	14.9929	Repressed	Enhancers
P481	chr10	92895273	92895646	5.28016	Repressed	Enhancers
P482	chr10	94101470	94102469	19.3411	Repressed	Enhancers
P483	chr10	94971419	94971738	6.12454	Repressed	Enhancers
P484	chr10	95140364	95140786	-3.27508	Repressed	Promoters
P485	chr10	95636352	95636558	12.3829	Repressed	Enhancers
P486	chr10	95643397	95644581	30.5595	Repressed	Enhancers
P487	chr10	95724922	95726766	10.639	Inducible	Enhancers
P488	chr10	95736274	95736772	14.1907	Repressed	Enhancers
P489	chr10	95742540	95742762	15.3872	Inducible	Enhancers
P490	chr10	95757342	95757734	9.51868	Inducible	Enhancers
P491	chr10	95795162	95796157	20.308	Repressed	Enhancers
P492	chr10	95800432	95800930	13.8881	Repressed	Enhancers
P493	chr10	95836246	95837236	21.7901	Inducible	Enhancers
P494	chr10	95840052	95840605	14.4672	Constitutive	Enhancers
P495	chr10	95898020	95898255	4.34969	Inducible	Enhancers
P496	chr10	96338857	96339188	8.81288	Repressed	Enhancers
P497	chr10	96852555	96852769	-1.48725	Inducible	Promoters
P498	chr10	98237477	98237704	4.7465	Repressed	Enhancers
P499	chr10	98239319	98239997	6.46217	Repressed	Enhancers
P500	chr10	98244411	98244987	10.0722	Repressed	Enhancers
P501	chr10	98342545	98344451	12.1854	Repressed	Enhancers
P502	chr10	98544184	98544843	12.1319	Constitutive	Enhancers
P503	chr10	98703227	98703447	-1.20821	Repressed	Promoters
P504	chr10	98704080	98704278	5.76477	Repressed	Enhancers
P505	chr10	98704366	98704857	9.15726	Repressed	Enhancers
P506	chr10	98922340	98923111	1.27213	Constitutive	Enhancers
P507	chr10	98923260	98924704	3.69322	Constitutive	Enhancers
P508	chr10	98929214	98930961	-1.98628	Constitutive	Promoters
P509	chr10	99622855	99623167	-1.13814	Repressed	Promoters
P510	chr10	110539083	110539981	-8.87577	Inducible	Promoters
P511	chr10	110555501	110555958	12.7897	Repressed	Enhancers
P512	chr10	110556103	110556820	12.8077	Repressed	Enhancers
P513	chr10	110556978	110557224	13.2281	Repressed	Enhancers
P514	chr10	110557249	110557530	26.1904	Repressed	Enhancers
P515	chr10	110563707	110564996	8.71943	Repressed	Enhancers
P516	chr10	110565332	110565982	24.4575	Constitutive	Enhancers
P517	chr10	110568015	110568351	6.08197	Repressed	Enhancers
P518	chr10	110568789	110568940	18.0112	Repressed	Enhancers
P519	chr10	110569401	110569900	37.3293	Repressed	Enhancers
P520	chr10	110570046	110570241	27.4496	Repressed	Enhancers
P521	chr10	110570973	110571843	18.1175	Repressed	Enhancers
P522	chr10	110596488	110596782	9.11498	Constitutive	Enhancers
P523	chr10	110599906	110600556	-74.3558	Constitutive	Promoters
P524	chr10	110830752	110831036	8.55831	Repressed	Enhancers
P525	chr10	110976884	110977303	5.57711	Repressed	Enhancers
P526	chr10	110980958	110981199	13.8295	Repressed	Enhancers
P527	chr10	111439056	111439657	1.633	Repressed	Enhancers
P528	chr10	114765542	114766056	11.3558	Constitutive	Enhancers
P529	chr10	116735386	116735673	36.8796	Repressed	Enhancers
P530	chr10	116737641	116737839	19.7562	Repressed	Enhancers
P531	chr10	116738070	116738280	22.2905	Repressed	Enhancers
P532	chr10	116739523	116739761	9.79698	Repressed	Enhancers
P533	chr10	116740287	116740532	15.3675	Repressed	Enhancers
P534	chr10	116740540	116740692	30.4067	Repressed	Enhancers
P535	chr10	116741488	116741838	15.2129	Repressed	Enhancers
P536	chr10	116742335	116742564	15.5459	Repressed	Enhancers
P537	chr10	116854241	116855529	-36.3736	Repressed	Promoters
P538	chr10	116855648	116856119	-22.1312	Repressed	Promoters
P539	chr10	116872028	116872662	1.93533	Repressed	Enhancers
P540	chr10	117156164	117156701	29.1169	Inducible	Enhancers
P541	chr10	117158485	117159266	-4.40757	Constitutive	Promoters
P542	chr10	117297693	117298410	7.84051	Repressed	Enhancers
P543	chr10	117309650	117309903	8.54548	Inducible	Enhancers
P544	chr10	117336527	117336856	14.5361	Repressed	Enhancers
P545	chr10	117342695	117343059	-5.28461	Inducible	Promoters
P546	chr10	117343264	117343887	0.178322	Inducible	Enhancers
P547	chr10	117346744	117347931	8.25298	Inducible	Enhancers
P548	chr10	117377874	117378354	-0.672407	Repressed	Promoters
P549	chr10	117449283	117449484	8.41466	Repressed	Enhancers
P550	chr10	117486431	117486717	6.64157	Repressed	Enhancers
P551	chr10	117487367	117487941	7.97475	Repressed	Enhancers
P552	chr10	117488352	117488616	2.70374	Repressed	Enhancers
P553	chr10	117488628	117488788	15.0637	Repressed	Enhancers
P554	chr10	117489024	117490142	11.8913	Repressed	Enhancers
P555	chr10	117520345	117520565	2.37831	Repressed	Enhancers
P556	chr10	117520871	117521327	13.3651	Repressed	Enhancers
P557	chr10	117521865	117523611	11.4479	Repressed	Enhancers
P558	chr10	117532097	117532443	7.08245	Repressed	Enhancers
P559	chr10	117533015	117533366	13.9173	Repressed	Enhancers
P560	chr10	117533383	117533602	17.7383	Repressed	Enhancers
P561	chr10	117533840	117536706	10.7942	Repressed	Enhancers
P562	chr10	117536724	117538339	26.5652	Repressed	Enhancers
P563	chr10	117538612	117539392	9.7735	Repressed	Enhancers
P564	chr10	117539505	117539799	39.4099	Repressed	Enhancers
P565	chr10	117539812	117540035	23.168	Repressed	Enhancers
P566	chr10	117540087	117541311	19.2257	Repressed	Enhancers
P567	chr10	117558141	117558308	11.0851	Repressed	Enhancers
P568	chr10	120051267	120051490	12.6307	Repressed	Enhancers
P569	chr10	120052992	120053524	20.6422	Repressed	Enhancers
P570	chr10	120054108	120055315	25.7499	Repressed	Enhancers
P571	chr10	120055457	120055635	21.1842	Repressed	Enhancers
P572	chr10	120060418	120061730	6.46658	Repressed	Enhancers
P573	chr10	120061746	120061868	13.6666	Repressed	Enhancers
P574	chr10	120061926	120062177	10.7205	Repressed	Enhancers
P575	chr10	120062190	120062947	6.89817	Repressed	Enhancers
P576	chr10	120063002	120063869	13.7537	Repressed	Enhancers
P577	chr10	120064254	120065489	13.577	Repressed	Enhancers
P578	chr10	120072887	120073588	13.6876	Repressed	Enhancers
P579	chr10	120101393	120101629	0.38526	Repressed	Enhancers
P580	chr10	120101923	120102154	-12.992	Repressed	Promoters
P581	chr10	120102662	120103150	8.81903	Repressed	Enhancers
P582	chr10	120103246	120103664	-2.59118	Repressed	Promoters
P583	chr10	120182197	120182391	-3.65544	Inducible	Promoters
P584	chr10	120933673	120934279	30.497	Repressed	Enhancers
P585	chr10	120934329	120934604	25.2765	Repressed	Enhancers
P586	chr10	120934668	120935534	27.8679	Repressed	Enhancers
P587	chr10	120970309	120970521	-1.21656	Inducible	Promoters
P588	chr10	122419950	122421897	-51.4794	Inducible	Promoters
P589	chr10	122522317	122522612	4.25731	Repressed	Enhancers
P590	chr10	124807082	124807659	-2.88773	Repressed	Promoters
P591	chr10	124825413	124826986	-39.8484	Repressed	Promoters
P592	chr10	126342504	126343214	-1.05876	Constitutive	Promoters
P593	chr10	126365193	126366241	-14.8318	Inducible	Promoters
P594	chr10	127068192	127069980	27.4827	Repressed	Enhancers
P595	chr10	127070612	127070853	17.2742	Repressed	Enhancers
P596	chr10	127071574	127072588	26.6487	Repressed	Enhancers
P597	chr10	127072733	127073356	30.7158	Constitutive	Enhancers
P598	chr10	127073834	127074032	12.7572	Repressed	Enhancers
P599	chr10	127074247	127074363	6.38178	Repressed	Enhancers
P600	chr10	129748579	129748889	1.47429	Inducible	Enhancers
P601	chr10	129978883	129979758	-26.4417	Constitutive	Promoters
P602	chr11	3000387	3000559	-10.1466	Constitutive	Promoters
P603	chr11	3005030	3005535	-8.19443	Repressed	Promoters
P604	chr11	4132884	4133170	17.4453	Constitutive	Enhancers
P605	chr11	4133319	4133780	20.0475	Constitutive	Enhancers
P606	chr11	4342306	4342558	-3.20524	Inducible	Promoters
P607	chr11	5385616	5386133	-8.02246	Constitutive	Promoters
P608	chr11	5405712	5406254	-1.16176	Inducible	Promoters
P609	chr11	5411959	5412861	12.0722	Constitutive	Enhancers
P610	chr11	8585382	8585539	9.52482	Inducible	Enhancers
P611	chr11	8589063	8589805	7.01036	Inducible	Enhancers
P612	chr11	8600821	8601197	25.8417	Constitutive	Enhancers
P613	chr11	8601515	8602109	26.3108	Constitutive	Enhancers
P614	chr11	8659864	8660072	2.01611	Repressed	Enhancers
P615	chr11	11446816	11447553	15.8206	Inducible	Enhancers
P616	chr11	11447586	11447992	14.2319	Inducible	Enhancers
P617	chr11	11453539	11453789	3.08543	Inducible	Enhancers
P618	chr11	11453802	11454054	6.1935	Inducible	Enhancers
P619	chr11	11454356	11454529	5.61335	Inducible	Enhancers
P620	chr11	11567274	11568878	12.095	Inducible	Enhancers
P621	chr11	11568934	11569543	4.49506	Inducible	Enhancers
P622	chr11	11572955	11573459	0.950726	Inducible	Enhancers
P623	chr11	11577428	11577627	-0.340132	Inducible	Promoters
P624	chr11	11582385	11582944	8.08212	Inducible	Enhancers
P625	chr11	11582998	11583447	-9.30633	Inducible	Promoters
P626	chr11	16570257	16570564	3.88843	Repressed	Enhancers
P627	chr11	19819313	19820807	-40.0001	Constitutive	Promoters
P628	chr11	20068787	20069349	11.776	Constitutive	Enhancers
P629	chr11	20345382	20345889	-5.5137	Inducible	Promoters
P630	chr11	20355092	20355538	-18.6137	Inducible	Promoters
P631	chr11	20355892	20356125	-31.8235	Inducible	Promoters
P632	chr11	20368442	20369074	17.2343	Constitutive	Enhancers
P633	chr11	20377210	20378107	13.2733	Constitutive	Enhancers
P634	chr11	20431662	20433050	-37.8657	Inducible	Promoters
P635	chr11	20815125	20815520	17.1351	Repressed	Enhancers
P636	chr11	20909704	20909936	3.68135	Inducible	Enhancers
P637	chr11	20914303	20914675	4.66311	Inducible	Enhancers
P638	chr11	20914718	20915076	10.9256	Inducible	Enhancers
P639	chr11	20933847	20934482	2.80247	Constitutive	Enhancers
P640	chr11	20946073	20947338	24.7744	Inducible	Enhancers
P641	chr11	20947483	20947824	14.1116	Inducible	Enhancers
P642	chr11	20947985	20948484	8.84513	Inducible	Enhancers
P643	chr11	20982697	20983211	1.87635	Inducible	Enhancers
P644	chr11	21325459	21326041	20.493	Repressed	Enhancers
P645	chr11	22967421	22968224	-21.3346	Constitutive	Promoters
P646	chr11	23535248	23535564	15.0539	Constitutive	Enhancers
P647	chr11	23535875	23536331	-3.98854	Constitutive	Promoters
P648	chr11	26540235	26540912	-5.42573	Constitutive	Promoters
P649	chr11	29547617	29548287	1.54967	Inducible	Enhancers
P650	chr11	31632761	31633159	10.4898	Inducible	Enhancers
P651	chr11	32171360	32171736	0.805134	Inducible	Enhancers
P652	chr11	32224530	32224981	-1.51381	Constitutive	Promoters
P653	chr11	43182152	43189373	-5.38457	Inducible	Promoters
P654	chr11	43189379	43190014	-1.4477	Inducible	Promoters
P655	chr11	43190053	43191995	3.02926	Inducible	Enhancers
P656	chr11	43193480	43194856	-65.39	Constitutive	Promoters
P657	chr11	43194878	43200116	-80.6113	Constitutive	Promoters
P658	chr11	43206361	43206838	-0.289655	Inducible	Promoters
P659	chr11	43446023	43446547	22.2719	Repressed	Enhancers
P660	chr11	44308846	44309042	0.695509	Inducible	Enhancers
P661	chr11	44309486	44310040	-1.24878	Inducible	Promoters
P662	chr11	44317661	44317976	4.92414	Inducible	Enhancers
P663	chr11	44318003	44318330	9.62243	Inducible	Enhancers
P664	chr11	46614908	46615131	2.1503	Inducible	Enhancers
P665	chr11	48601255	48601783	-8.95192	Constitutive	Promoters
P666	chr11	49050836	49051630	3.0394	Inducible	Enhancers
P667	chr11	49568723	49568964	0.425676	Inducible	Enhancers
P668	chr11	50025907	50027283	-9.56587	Constitutive	Promoters
P669	chr11	50184964	50185243	-0.894938	Repressed	Promoters
P670	chr11	51687878	51688375	19.6591	Repressed	Enhancers
P671	chr11	51688590	51688857	20.2637	Repressed	Enhancers
P672	chr11	51729030	51730736	-9.27611	Repressed	Promoters
P673	chr11	51730897	51731397	25.0802	Repressed	Enhancers
P674	chr11	51734788	51735523	7.40204	Repressed	Enhancers
P675	chr11	51738746	51738995	17.0931	Repressed	Enhancers
P676	chr11	51739007	51739575	21.1808	Repressed	Enhancers
P677	chr11	51739779	51740096	8.75704	Repressed	Enhancers
P678	chr11	51740573	51740985	24.4269	Repressed	Enhancers
P679	chr11	51744338	51745023	15.2198	Repressed	Enhancers
P680	chr11	51745847	51747203	11.8534	Repressed	Enhancers
P681	chr11	53576022	53577862	-8.52713	Constitutive	Promoters
P682	chr11	53706481	53706988	35.1909	Constitutive	Enhancers
P683	chr11	53901872	53902659	10.5491	Repressed	Enhancers
P684	chr11	53905386	53905709	13.3812	Repressed	Enhancers
P685	chr11	53969284	53969488	10.5804	Repressed	Enhancers
P686	chr11	53969694	53970262	23.5908	Repressed	Enhancers
P687	chr11	54615224	54615529	9.1209	Repressed	Enhancers
P688	chr11	54615882	54616139	10.463	Repressed	Enhancers
P689	chr11	54621123	54621384	13.0063	Repressed	Enhancers
P690	chr11	54698294	54699039	17.2185	Repressed	Enhancers
P691	chr11	55246549	55246783	6.49442	Repressed	Enhancers
P692	chr11	57775725	57776626	-19.6211	Inducible	Promoters
P693	chr11	57906080	57906950	-4.65314	Inducible	Promoters
P694	chr11	57916195	57916545	-58.3901	Constitutive	Promoters
P695	chr11	58449578	58449872	-3.28614	Constitutive	Promoters
P696	chr11	59205837	59206137	-0.00588179	Constitutive	Promoters
P697	chr11	59339029	59340239	0.483164	Repressed	Enhancers
P698	chr11	59340325	59341695	2.71168	Repressed	Enhancers
P699	chr11	59351757	59353021	17.1998	Constitutive	Enhancers
P700	chr11	61221506	61222171	-24.4966	Constitutive	Promoters
P701	chr11	61282707	61283259	10.9245	Repressed	Enhancers
P702	chr11	61312272	61312630	1.17087	Repressed	Enhancers
P703	chr11	62828100	62828321	10.9554	Repressed	Enhancers
P704	chr11	62834045	62834493	13.0794	Repressed	Enhancers
P705	chr11	62840049	62840539	18.2877	Repressed	Enhancers
P706	chr11	62859296	62861357	5.61119	Repressed	Enhancers
P707	chr11	62863944	62864271	8.46412	Repressed	Enhancers
P708	chr11	62864429	62865001	13.9704	Repressed	Enhancers
P709	chr11	62865125	62865317	16.124	Repressed	Enhancers
P710	chr11	62865432	62866675	16.1798	Repressed	Enhancers
P711	chr11	65607797	65608278	-0.619946	Inducible	Promoters
P712	chr11	68825651	68826198	-20.9465	Constitutive	Promoters
P713	chr11	69059255	69059645	-7.96643	Inducible	Promoters
P714	chr11	69079744	69080125	2.25341	Inducible	Enhancers
P715	chr11	69897997	69898532	15.56	Repressed	Enhancers
P716	chr11	69998537	69998907	9.54763	Constitutive	Enhancers
P717	chr11	70003587	70003775	14.5016	Repressed	Enhancers
P718	chr11	70004621	70004990	16.738	Repressed	Enhancers
P719	chr11	70186336	70186681	8.35209	Repressed	Enhancers
P720	chr11	70186755	70186959	12.126	Repressed	Enhancers
P721	chr11	70187866	70188242	14.4184	Repressed	Enhancers
P722	chr11	70189603	70190059	8.50945	Repressed	Enhancers
P723	chr11	70302499	70303521	20.2877	Repressed	Enhancers
P724	chr11	70313304	70313661	28.3602	Repressed	Enhancers
P725	chr11	70443793	70444013	1.09997	Repressed	Enhancers
P726	chr11	72754364	72754568	-6.03668	Inducible	Promoters
P727	chr11	75092800	75093172	-0.777946	Repressed	Promoters
P728	chr11	75271458	75272031	11.1806	Constitutive	Enhancers
P729	chr11	76400109	76402087	24.5761	Repressed	Enhancers
P730	chr11	76403280	76403799	27.6975	Repressed	Enhancers
P731	chr11	76424023	76424296	4.26357	Repressed	Enhancers
P732	chr11	76435523	76437467	-77.0386	Inducible	Promoters
P733	chr11	76442168	76442608	12.2005	Repressed	Enhancers
P734	chr11	76670942	76671251	37.2388	Repressed	Enhancers
P735	chr11	76711271	76711822	10.7967	Inducible	Enhancers
P736	chr11	76712173	76712382	6.39587	Inducible	Enhancers
P737	chr11	76715274	76715533	6.56384	Inducible	Enhancers
P738	chr11	77010332	77010525	15.9746	Repressed	Enhancers
P739	chr11	78700146	78700544	-2.68615	Inducible	Promoters
P740	chr11	78700595	78701499	2.28289	Inducible	Enhancers
P741	chr11	78702023	78702245	-3.54156	Inducible	Promoters
P742	chr11	78702307	78703074	-2.39989	Inducible	Promoters
P743	chr11	78729043	78729262	14.2294	Inducible	Enhancers
P744	chr11	78729470	78730151	17.1051	Inducible	Enhancers
P745	chr11	79020793	79021677	9.88247	Inducible	Enhancers
P746	chr11	79027614	79028027	12.3087	Constitutive	Enhancers
P747	chr11	79038173	79038811	0.226073	Repressed	Enhancers
P748	chr11	79091893	79092960	0.767762	Repressed	Enhancers
P749	chr11	79099644	79099981	17.7562	Repressed	Enhancers
P750	chr11	79099983	79100453	21.9372	Repressed	Enhancers
P751	chr11	79100531	79101242	24.5523	Repressed	Enhancers
P752	chr11	79101245	79101386	29.5234	Repressed	Enhancers
P753	chr11	79118806	79120420	6.69954	Repressed	Enhancers
P754	chr11	79120422	79120885	15.9398	Repressed	Enhancers
P755	chr11	79524427	79525147	-51.4068	Constitutive	Promoters
P756	chr11	79787075	79787447	-44.562	Inducible	Promoters
P757	chr11	79787502	79788201	-35.4856	Inducible	Promoters
P758	chr11	81809759	81810421	8.42449	Repressed	Enhancers
P759	chr11	81816894	81822127	19.672	Repressed	Enhancers
P760	chr11	81823804	81824333	43.2912	Constitutive	Enhancers
P761	chr11	81829211	81829830	30.6489	Constitutive	Enhancers
P762	chr11	81829858	81830421	40.735	Repressed	Enhancers
P763	chr11	81835819	81837670	24.2801	Repressed	Enhancers
P764	chr11	81901648	81901912	14.64	Inducible	Enhancers
P765	chr11	82856747	82858379	-1.43296	Inducible	Promoters
P766	chr11	82858427	82859593	-2.38821	Inducible	Promoters
P767	chr11	83084562	83088026	29.0172	Constitutive	Enhancers
P768	chr11	83344984	83345526	7.72759	Inducible	Enhancers
P769	chr11	83345607	83346001	-3.23375	Inducible	Promoters
P770	chr11	83346015	83346990	8.13523	Inducible	Enhancers
P771	chr11	83347000	83347486	9.12402	Inducible	Enhancers
P772	chr11	83347557	83348992	12.7732	Inducible	Enhancers
P773	chr11	83349007	83350793	28.8208	Inducible	Enhancers
P774	chr11	83353152	83353491	5.31321	Inducible	Enhancers
P775	chr11	83353718	83355666	4.37704	Inducible	Enhancers
P776	chr11	83357054	83357418	6.21514	Inducible	Enhancers
P777	chr11	83357653	83358848	6.42575	Inducible	Enhancers
P778	chr11	83358858	83359223	2.66738	Inducible	Enhancers
P779	chr11	83362867	83364731	12.8662	Inducible	Enhancers
P780	chr11	83365033	83365777	9.85746	Inducible	Enhancers
P781	chr11	83544799	83545016	1.80382	Inducible	Enhancers
P782	chr11	83545038	83545335	1.20463	Inducible	Enhancers
P783	chr11	83551080	83551521	9.17149	Inducible	Enhancers
P784	chr11	85062749	85063148	10.3661	Repressed	Enhancers
P785	chr11	85063780	85064046	12.767	Repressed	Enhancers
P786	chr11	85064048	85064302	-1.13659	Repressed	Promoters
P787	chr11	86721428	86721962	0.233853	Repressed	Enhancers
P788	chr11	86734055	86734373	12.2483	Repressed	Enhancers
P789	chr11	88047024	88047297	22.464	Repressed	Enhancers
P790	chr11	88047313	88048213	18.4545	Repressed	Enhancers
P791	chr11	88048253	88048673	19.0414	Repressed	Enhancers
P792	chr11	88048892	88049614	16.7982	Constitutive	Enhancers
P793	chr11	88055135	88055758	9.10974	Repressed	Enhancers
P794	chr11	93682764	93683445	12.0162	Repressed	Enhancers
P795	chr11	93848897	93849719	21.6253	Repressed	Enhancers
P796	chr11	94006455	94006674	2.88964	Repressed	Enhancers
P797	chr11	94022463	94023495	16.629	Constitutive	Enhancers
P798	chr11	97273267	97274624	8.65936	Inducible	Enhancers
P799	chr11	97301146	97302208	-1.66188	Inducible	Promoters
P800	chr11	99043887	99044238	-1.84493	Constitutive	Promoters
P801	chr11	99050113	99050505	1.85493	Inducible	Enhancers
P802	chr11	100861388	100861613	7.65894	Inducible	Enhancers
P803	chr11	101466040	101466826	-0.26841	Constitutive	Promoters
P804	chr11	102105937	102106319	-28.2494	Repressed	Promoters
P805	chr11	102106348	102108020	-33.1052	Repressed	Promoters
P806	chr11	102285750	102287175	19.9863	Repressed	Enhancers
P807	chr11	102883420	102883848	11.3083	Constitutive	Enhancers
P808	chr11	103020423	103020726	0.692726	Repressed	Enhancers
P809	chr11	103143215	103143699	23.6598	Constitutive	Enhancers
P810	chr11	103149703	103150045	4.96568	Repressed	Enhancers
P811	chr11	103169238	103169713	5.8693	Repressed	Enhancers
P812	chr11	103208209	103208561	8.01342	Inducible	Enhancers
P813	chr11	103280403	103280594	4.6904	Inducible	Enhancers
P814	chr11	105321231	105321668	9.46391	Repressed	Enhancers
P815	chr11	105814910	105815067	17.8661	Repressed	Enhancers
P816	chr11	106822637	106823324	6.88551	Repressed	Enhancers
P817	chr11	106872950	106874361	-15.1759	Constitutive	Promoters
P818	chr11	108872920	108873413	-15.007	Inducible	Promoters
P819	chr11	108961474	108961736	9.39664	Repressed	Enhancers
P820	chr11	109205260	109205783	12.6709	Inducible	Enhancers
P821	chr11	109720779	109721045	-8.00347	Repressed	Promoters
P822	chr11	109721406	109721888	7.93485	Repressed	Enhancers
P823	chr11	114826095	114826348	10.8212	Repressed	Enhancers
P824	chr11	114826375	114827265	24.761	Repressed	Enhancers
P825	chr11	114829487	114829885	7.87796	Repressed	Enhancers
P826	chr11	114830015	114830676	10.8779	Repressed	Enhancers
P827	chr11	114866200	114866917	8.59727	Repressed	Enhancers
P828	chr11	114866930	114867216	27.7442	Repressed	Enhancers
P829	chr11	114867259	114867754	11.5409	Repressed	Enhancers
P830	chr11	114867792	114868237	10.2257	Repressed	Enhancers
P831	chr11	114923387	114923760	18.8324	Repressed	Enhancers
P832	chr11	114925232	114925569	2.99852	Repressed	Enhancers
P833	chr11	114926591	114928022	11.2936	Repressed	Enhancers
P834	chr11	114931773	114932181	26.2339	Repressed	Enhancers
P835	chr11	114932234	114933812	22.4527	Repressed	Enhancers
P836	chr11	114933949	114934392	9.7886	Repressed	Enhancers
P837	chr11	114934609	114934943	31.7313	Repressed	Enhancers
P838	chr11	115235426	115235890	-5.1733	Constitutive	Promoters
P839	chr11	115492435	115492859	8.25518	Inducible	Enhancers
P840	chr11	115955015	115955318	13.6379	Repressed	Enhancers
P841	chr11	116285176	116286042	7.49289	Inducible	Enhancers
P842	chr11	116290607	116290986	9.21247	Inducible	Enhancers
P843	chr11	116970900	116971114	8.55296	Repressed	Enhancers
P844	chr11	117036162	117036647	2.15537	Repressed	Enhancers
P845	chr11	117460533	117460838	-41.8141	Inducible	Promoters
P846	chr11	117740208	117740619	13.6013	Constitutive	Enhancers
P847	chr11	117806536	117808683	4.42009	Inducible	Enhancers
P848	chr11	117810175	117811477	15.4269	Inducible	Enhancers
P849	chr11	117811510	117811944	7.92012	Inducible	Enhancers
P850	chr11	117835481	117839036	27.6153	Inducible	Enhancers
P851	chr11	117839175	117842074	24.1842	Inducible	Enhancers
P852	chr11	117842171	117842392	4.48925	Inducible	Enhancers
P853	chr11	117842404	117842902	25.7166	Inducible	Enhancers
P854	chr11	117842984	117843390	13.9962	Inducible	Enhancers
P855	chr11	117843421	117844395	5.55116	Inducible	Enhancers
P856	chr11	118223504	118224996	32.9656	Constitutive	Enhancers
P857	chr11	118841836	118842100	-2.55816	Inducible	Promoters
P858	chr11	118842319	118842604	1.57468	Inducible	Enhancers
P859	chr11	118917982	118918575	-32.0901	Inducible	Promoters
P860	chr11	119253238	119256924	-121.408	Constitutive	Promoters
P861	chr11	119257512	119258431	-29.1991	Constitutive	Promoters
P862	chr11	120080160	120080506	4.85406	Repressed	Enhancers
P863	chr11	120080512	120080722	9.73401	Repressed	Enhancers
P864	chr11	120177141	120178085	-43.1447	Constitutive	Promoters
P865	chr11	120178261	120178661	-36.0116	Constitutive	Promoters
P866	chr11	120371873	120372432	-5.30096	Inducible	Promoters
P867	chr11	120379344	120380125	12.6937	Constitutive	Enhancers
P868	chr11	120380880	120381494	7.18473	Inducible	Enhancers
P869	chr11	120799295	120799631	5.96789	Repressed	Enhancers
P870	chr11	120800148	120800587	12.3139	Repressed	Enhancers
P871	chr11	121547424	121547733	20.3194	Repressed	Enhancers
P872	chr11	121558735	121560150	22.5096	Constitutive	Enhancers
P873	chr11	121601897	121604262	22.9137	Repressed	Enhancers
P874	chr11	121604288	121607904	20.9723	Repressed	Enhancers
P875	chr11	121608306	121610940	13.2351	Repressed	Enhancers
P876	chr11	121642639	121642882	7.52344	Repressed	Enhancers
P877	chr11	121643010	121643284	7.49758	Repressed	Enhancers
P878	chr11	121654475	121654671	13.5516	Repressed	Enhancers
P879	chr11	121655236	121658676	26.9519	Repressed	Enhancers
P880	chr12	3356677	3357306	-3.05899	Constitutive	Promoters
P881	chr12	3360170	3360559	7.03086	Inducible	Enhancers
P882	chr12	3791718	3792234	-0.342692	Constitutive	Promoters
P883	chr12	4512136	4512666	12.0933	Repressed	Enhancers
P884	chr12	4546399	4546754	5.80807	Inducible	Enhancers
P885	chr12	4552224	4552442	5.41493	Constitutive	Enhancers
P886	chr12	8443737	8443922	14.9041	Inducible	Enhancers
P887	chr12	8647448	8648042	-23.4879	Repressed	Promoters
P888	chr12	8674169	8674566	6.77882	Repressed	Enhancers
P889	chr12	8861256	8861702	12.0511	Repressed	Enhancers
P890	chr12	12237166	12237293	5.65927	Inducible	Enhancers
P891	chr12	16872828	16873057	4.89976	Repressed	Enhancers
P892	chr12	16882204	16882410	26.2969	Repressed	Enhancers
P893	chr12	16882455	16882901	38.6277	Repressed	Enhancers
P894	chr12	21549011	21549620	-17.6667	Inducible	Promoters
P895	chr12	25177817	25178307	-4.58233	Constitutive	Promoters
P896	chr12	25178382	25178753	-8.42513	Constitutive	Promoters
P897	chr12	25443137	25443424	7.00305	Repressed	Enhancers
P898	chr12	25828586	25828766	6.02933	Inducible	Enhancers
P899	chr12	25873501	25874099	18.1195	Repressed	Enhancers
P900	chr12	25874115	25876581	17.0223	Repressed	Enhancers
P901	chr12	25882689	25882911	11.9871	Repressed	Enhancers
P902	chr12	25888303	25889003	4.309	Repressed	Enhancers
P903	chr12	25892855	25893502	12.865	Repressed	Enhancers
P904	chr12	25893531	25894205	23.6696	Constitutive	Enhancers
P905	chr12	25898090	25898789	14.2722	Repressed	Enhancers
P906	chr12	25898873	25899461	19.0602	Repressed	Enhancers
P907	chr12	25899697	25899918	13.3776	Repressed	Enhancers
P908	chr12	26024763	26025237	6.90936	Inducible	Enhancers
P909	chr12	26800284	26800602	1.35356	Inducible	Enhancers
P910	chr12	27149514	27149669	-2.17575	Inducible	Promoters
P911	chr12	27149706	27150289	-0.00787907	Inducible	Promoters
P912	chr12	27150311	27150641	-1.3929	Inducible	Promoters
P913	chr12	27151058	27151582	3.4992	Inducible	Enhancers
P914	chr12	27151727	27152005	-1.1778	Inducible	Promoters
P915	chr12	27152935	27153252	-43.898	Inducible	Promoters
P916	chr12	29975706	29976002	-4.96826	Constitutive	Promoters
P917	chr12	32823331	32823602	10.3615	Repressed	Enhancers
P918	chr12	32900115	32900435	20.6476	Repressed	Enhancers
P919	chr12	32915152	32915341	13.3168	Repressed	Enhancers
P920	chr12	32976797	32978183	6.94561	Constitutive	Enhancers
P921	chr12	32990767	32991982	7.53115	Inducible	Enhancers
P922	chr12	32992002	32992437	14.8933	Inducible	Enhancers
P923	chr12	33025282	33025624	3.84656	Inducible	Enhancers
P924	chr12	33115857	33116472	8.75601	Repressed	Enhancers
P925	chr12	33171731	33171932	8.22859	Repressed	Enhancers
P926	chr12	33478659	33478860	-9.30589	Inducible	Promoters
P927	chr12	33480525	33480797	-0.647288	Inducible	Promoters
P928	chr12	33480850	33481812	-4.475	Inducible	Promoters
P929	chr12	33702202	33702458	-0.080448	Inducible	Promoters
P930	chr12	35723533	35724033	-4.72854	Inducible	Promoters
P931	chr12	36611930	36612111	6.6374	Repressed	Enhancers
P932	chr12	39655398	39655873	-10.5369	Repressed	Promoters
P933	chr12	52945761	52946271	-2.92954	Constitutive	Promoters
P934	chr12	55505500	55506607	16.1979	Repressed	Enhancers
P935	chr12	55922130	55922394	6.99365	Repressed	Enhancers
P936	chr12	55975943	55976209	2.28344	Repressed	Enhancers
P937	chr12	56099993	56100630	5.29151	Repressed	Enhancers
P938	chr12	56120517	56120882	6.62924	Repressed	Enhancers
P939	chr12	56544037	56544623	6.88168	Inducible	Enhancers
P940	chr12	56565351	56569930	-16.3327	Inducible	Promoters
P941	chr12	56574562	56575077	13.1161	Inducible	Enhancers
P942	chr12	56661104	56661563	-9.03794	Inducible	Promoters
P943	chr12	59639268	59639447	-3.09249	Repressed	Promoters
P944	chr12	70523754	70524212	23.1504	Constitutive	Enhancers
P945	chr12	70525836	70526035	0.299122	Repressed	Enhancers
P946	chr12	70547031	70548027	-0.934454	Repressed	Promoters
P947	chr12	70548062	70549858	-3.54774	Repressed	Promoters
P948	chr12	70586581	70587333	9.53185	Repressed	Enhancers
P949	chr12	70601563	70605938	-9.45577	Constitutive	Promoters
P950	chr12	70614008	70614651	4.64877	Inducible	Enhancers
P951	chr12	70617456	70617950	38.0273	Constitutive	Enhancers
P952	chr12	70638040	70640437	12.1267	Repressed	Enhancers
P953	chr12	71237064	71237787	-1.35617	Constitutive	Promoters
P954	chr12	71241481	71241789	5.69384	Repressed	Enhancers
P955	chr12	73921760	73922186	-4.73387	Constitutive	Promoters
P956	chr12	73944918	73945751	6.8215	Constitutive	Enhancers
P957	chr12	74545986	74546560	5.66578	Inducible	Enhancers
P958	chr12	74889987	74890316	10.2288	Constitutive	Enhancers
P959	chr12	74981194	74981600	7.60082	Inducible	Enhancers
P960	chr12	74982457	74982767	9.31219	Inducible	Enhancers
P961	chr12	75417984	75418265	-13.5041	Constitutive	Promoters
P962	chr12	75904894	75905496	-3.39447	Constitutive	Promoters
P963	chr12	75925974	75926544	0.515287	Repressed	Enhancers
P964	chr12	78121039	78121490	1.52745	Repressed	Enhancers
P965	chr12	78160935	78161675	-10.2997	Inducible	Promoters
P966	chr12	80118852	80119181	9.45196	Repressed	Enhancers
P967	chr12	80942322	80942577	19.0015	Repressed	Enhancers
P968	chr12	81115185	81115566	10.27	Repressed	Enhancers
P969	chr12	81886258	81886478	3.68072	Inducible	Enhancers
P970	chr12	82908267	82908699	4.6512	Inducible	Enhancers
P971	chr12	85268776	85268941	11.8015	Repressed	Enhancers
P972	chr12	85288069	85288945	3.99817	Constitutive	Enhancers
P973	chr12	86533514	86533872	4.90116	Repressed	Enhancers
P974	chr12	86721299	86721596	16.3319	Repressed	Enhancers
P975	chr12	86722462	86722692	19.7095	Repressed	Enhancers
P976	chr12	86726289	86726617	35.7247	Repressed	Enhancers
P977	chr12	86726673	86727210	17.2835	Repressed	Enhancers
P978	chr12	86734799	86735168	13.7643	Repressed	Enhancers
P979	chr12	86736609	86736942	19.2603	Repressed	Enhancers
P980	chr12	86738193	86738456	11.51	Repressed	Enhancers
P981	chr12	86785277	86786345	8.1076	Inducible	Enhancers
P982	chr12	86796372	86796779	-11.3338	Repressed	Promoters
P983	chr12	86809742	86810255	11.8583	Constitutive	Enhancers
P984	chr12	86828235	86828928	-22.2686	Repressed	Promoters
P985	chr12	86830071	86831736	18.7641	Repressed	Enhancers
P986	chr12	86873649	86874293	9.46623	Repressed	Enhancers
P987	chr12	87007501	87007689	4.76315	Inducible	Enhancers
P988	chr12	87007724	87008037	9.09086	Inducible	Enhancers
P989	chr12	87010942	87011349	2.3723	Constitutive	Enhancers
P990	chr12	88128236	88128659	21.2818	Repressed	Enhancers
P991	chr12	88141688	88143030	22.1321	Repressed	Enhancers
P992	chr12	88144086	88144805	23.974	Constitutive	Enhancers
P993	chr12	88151640	88152569	17.5823	Repressed	Enhancers
P994	chr12	88159626	88160938	9.5787	Constitutive	Enhancers
P995	chr12	88161037	88161663	8.61204	Constitutive	Enhancers
P996	chr12	88162091	88162441	-7.34092	Constitutive	Promoters
P997	chr12	88164164	88167028	-14.3544	Repressed	Promoters
P998	chr12	88172709	88176062	5.76383	Repressed	Enhancers
P999	chr12	88176187	88177196	-10.9761	Constitutive	Promoters
P1000	chr12	88177225	88178054	4.50873	Repressed	Enhancers
P1001	chr12	88200447	88200733	8.05725	Inducible	Enhancers
P1002	chr12	88200805	88200970	4.86384	Inducible	Enhancers
P1003	chr12	88228806	88230711	4.62927	Constitutive	Enhancers
P1004	chr12	88231762	88232374	-62.7693	Constitutive	Promoters
P1005	chr12	88232408	88235342	-29.0443	Constitutive	Promoters
P1006	chr12	88248763	88248979	4.58684	Repressed	Enhancers
P1007	chr12	88251040	88251364	6.35932	Repressed	Enhancers
P1008	chr12	88255173	88256189	17.4033	Repressed	Enhancers
P1009	chr12	88748576	88749395	1.36872	Repressed	Enhancers
P1010	chr12	99613676	99614004	10.3448	Repressed	Enhancers
P1011	chr12	100872045	100872237	4.23119	Inducible	Enhancers
P1012	chr12	100878265	100879494	5.53304	Repressed	Enhancers
P1013	chr12	100879720	100879980	-10.6326	Repressed	Promoters
P1014	chr12	100880284	100880498	4.78425	Repressed	Enhancers
P1015	chr12	101406516	101407161	4.46809	Repressed	Enhancers
P1016	chr12	101422122	101422897	18.5903	Repressed	Enhancers
P1017	chr12	101515970	101516270	10.8611	Inducible	Enhancers
P1018	chr12	101766423	101766700	10.8686	Repressed	Enhancers
P1019	chr12	101769142	101769483	31.6691	Repressed	Enhancers
P1020	chr12	101967361	101967714	-6.29971	Repressed	Promoters
P1021	chr12	102014114	102014576	19.2264	Repressed	Enhancers
P1022	chr12	103208501	103208772	-2.01114	Inducible	Promoters
P1023	chr12	103688487	103690201	23.5537	Repressed	Enhancers
P1024	chr12	103690987	103691793	27.5371	Repressed	Enhancers
P1025	chr12	103693931	103694162	13.7957	Constitutive	Enhancers
P1026	chr12	103755923	103756295	1.69237	Repressed	Enhancers
P1027	chr12	103951335	103951933	-2.97969	Constitutive	Promoters
P1028	chr12	103959095	103959489	5.54663	Constitutive	Enhancers
P1029	chr12	103968533	103969184	5.00124	Inducible	Enhancers
P1030	chr12	105409898	105410163	-0.850503	Inducible	Promoters
P1031	chr12	105424293	105424557	8.10081	Repressed	Enhancers
P1032	chr12	105425890	105426024	3.8045	Inducible	Enhancers
P1033	chr12	105428474	105428620	0.716905	Inducible	Enhancers
P1034	chr12	105429676	105429914	4.90961	Inducible	Enhancers
P1035	chr12	106251466	106251812	24.4214	Repressed	Enhancers
P1036	chr12	106258131	106258401	2.45849	Inducible	Enhancers
P1037	chr12	107173173	107173972	-5.27037	Inducible	Promoters
P1038	chr12	108883859	108884132	-13.3246	Inducible	Promoters
P1039	chr12	109325052	109325254	3.01913	Repressed	Enhancers
P1040	chr12	109326450	109326661	5.87464	Repressed	Enhancers
P1041	chr12	109995817	109996694	-8.8086	Constitutive	Promoters
P1042	chr12	109999306	109999940	10.3245	Repressed	Enhancers
P1043	chr12	110001156	110002942	-60.111	Constitutive	Promoters
P1044	chr12	110002982	110005583	-50.2284	Constitutive	Promoters
P1045	chr12	111944840	111945207	3.72015	Repressed	Enhancers
P1046	chr12	112229681	112230854	-28.9026	Repressed	Promoters
P1047	chr12	112397858	112398452	6.11388	Inducible	Enhancers
P1048	chr12	112753151	112753502	2.13583	Inducible	Enhancers
P1049	chr12	113182752	113183997	5.113	Repressed	Enhancers
P1050	chr12	113184065	113184189	26.9444	Repressed	Enhancers
P1051	chr12	113184535	113185095	12.9842	Repressed	Enhancers
P1052	chr12	113816976	113817369	31.2532	Repressed	Enhancers
P1053	chr12	113931359	113932283	-31.6331	Constitutive	Promoters
P1054	chr12	114071810	114072173	1.43184	Constitutive	Enhancers
P1055	chr12	114078441	114078815	3.07981	Repressed	Enhancers
P1056	chr12	114102617	114105855	25.2464	Inducible	Enhancers
P1057	chr12	114106264	114107123	8.78032	Inducible	Enhancers
P1058	chr12	114108891	114109379	18.0348	Inducible	Enhancers
P1059	chr12	114133250	114133812	11.4278	Repressed	Enhancers
P1060	chr12	114135590	114136454	27.9599	Repressed	Enhancers
P1061	chr12	118717289	118718704	36.7322	Repressed	Enhancers
P1062	chr12	118718926	118719285	39.6959	Repressed	Enhancers
P1063	chr13	3360265	3360442	-17.0936	Constitutive	Promoters
P1064	chr13	4661537	4661894	0.111634	Constitutive	Enhancers
P1065	chr13	4661903	4662395	-1.85338	Constitutive	Promoters
P1066	chr13	5604202	5604681	15.3091	Repressed	Enhancers
P1067	chr13	5776780	5777384	2.41022	Inducible	Enhancers
P1068	chr13	5778226	5778614	2.67366	Inducible	Enhancers
P1069	chr13	5785553	5786509	3.52101	Inducible	Enhancers
P1070	chr13	5787767	5788501	13.8971	Inducible	Enhancers
P1071	chr13	5788711	5790087	9.62663	Inducible	Enhancers
P1072	chr13	5801430	5804121	10.9925	Repressed	Enhancers
P1073	chr13	5816434	5817164	1.9814	Inducible	Enhancers
P1074	chr13	5817308	5817643	4.89032	Inducible	Enhancers
P1075	chr13	5828803	5829216	0.706734	Inducible	Enhancers
P1076	chr13	5886246	5886533	11.8536	Constitutive	Enhancers
P1077	chr13	5886728	5887255	10.2383	Repressed	Enhancers
P1078	chr13	5887267	5888357	11.7596	Repressed	Enhancers
P1079	chr13	5888386	5889069	8.3486	Repressed	Enhancers
P1080	chr13	9190319	9190915	13.3452	Repressed	Enhancers
P1081	chr13	13629867	13630346	10.3548	Repressed	Enhancers
P1082	chr13	13630630	13631039	6.83545	Repressed	Enhancers
P1083	chr13	13631050	13631561	6.70257	Repressed	Enhancers
P1084	chr13	13631614	13631833	6.77296	Repressed	Enhancers
P1085	chr13	13643571	13643790	20.7333	Repressed	Enhancers
P1086	chr13	19946346	19946910	12.9025	Constitutive	Enhancers
P1087	chr13	20877818	20878192	15.5235	Inducible	Enhancers
P1088	chr13	20878522	20879245	31.6445	Inducible	Enhancers
P1089	chr13	20879318	20880329	28.8145	Inducible	Enhancers
P1090	chr13	21944231	21944661	1.85877	Constitutive	Enhancers
P1091	chr13	22005891	22006117	-6.51427	Repressed	Promoters
P1092	chr13	22112300	22112635	-57.4553	Inducible	Promoters
P1093	chr13	23537046	23537996	-67.0392	Inducible	Promoters
P1094	chr13	23608180	23608468	-39.2567	Inducible	Promoters
P1095	chr13	23820846	23821500	11.8795	Repressed	Enhancers
P1096	chr13	24881050	24883118	-3.92033	Repressed	Promoters
P1097	chr13	24883248	24885170	3.77099	Repressed	Enhancers
P1098	chr13	34807256	34807473	14.6708	Repressed	Enhancers
P1099	chr13	35170361	35170619	3.58235	Inducible	Enhancers
P1100	chr13	35170744	35170949	4.37113	Inducible	Enhancers
P1101	chr13	35171388	35171598	3.42303	Inducible	Enhancers
P1102	chr13	35172005	35172211	4.76825	Inducible	Enhancers
P1103	chr13	35172221	35172407	2.68247	Inducible	Enhancers
P1104	chr13	35300177	35300471	11.4425	Inducible	Enhancers
P1105	chr13	35621628	35621882	1.25474	Inducible	Enhancers
P1106	chr13	35739263	35739481	14.4875	Repressed	Enhancers
P1107	chr13	35739568	35739775	14.3724	Repressed	Enhancers
P1108	chr13	37148478	37148730	15.0477	Repressed	Enhancers
P1109	chr13	37382575	37382795	13.8116	Repressed	Enhancers
P1110	chr13	37429178	37429586	16.0382	Inducible	Enhancers
P1111	chr13	37543858	37544617	-0.59517	Constitutive	Promoters
P1112	chr13	37547387	37547714	11.8566	Inducible	Enhancers
P1113	chr13	37672597	37673092	1.36414	Inducible	Enhancers
P1114	chr13	37711652	37712100	11.5044	Repressed	Enhancers
P1115	chr13	37712121	37712388	15.9279	Repressed	Enhancers
P1116	chr13	37734326	37734799	4.87507	Repressed	Enhancers
P1117	chr13	37749169	37749586	1.69732	Inducible	Enhancers
P1118	chr13	37749805	37750365	-4.20569	Inducible	Promoters
P1119	chr13	37770582	37771080	13.8496	Constitutive	Enhancers
P1120	chr13	37843554	37843839	17.2726	Repressed	Enhancers
P1121	chr13	37853015	37853214	14.1265	Repressed	Enhancers
P1122	chr13	37869857	37871554	-57.6709	Constitutive	Promoters
P1123	chr13	41214505	41214836	11.5646	Repressed	Enhancers
P1124	chr13	41678963	41679436	0.608298	Inducible	Enhancers
P1125	chr13	41700473	41702204	-73.0251	Inducible	Promoters
P1126	chr13	41707608	41707858	2.62654	Inducible	Enhancers
P1127	chr13	42339347	42339642	-12.6502	Inducible	Promoters
P1128	chr13	42340053	42341058	-10.8744	Inducible	Promoters
P1129	chr13	42341076	42341640	2.60651	Inducible	Enhancers
P1130	chr13	42349355	42349656	8.84949	Inducible	Enhancers
P1131	chr13	42354082	42354595	4.88488	Inducible	Enhancers
P1132	chr13	42463181	42463468	9.85215	Constitutive	Enhancers
P1133	chr13	42467512	42467714	17.7699	Inducible	Enhancers
P1134	chr13	42469572	42469784	18.304	Inducible	Enhancers
P1135	chr13	42488097	42488280	18.4209	Inducible	Enhancers
P1136	chr13	42488333	42488567	11.6883	Inducible	Enhancers
P1137	chr13	42488623	42488918	7.48411	Inducible	Enhancers
P1138	chr13	43620261	43620608	8.13704	Constitutive	Enhancers
P1139	chr13	43860728	43861024	13.8269	Repressed	Enhancers
P1140	chr13	43872433	43872861	34.8886	Inducible	Enhancers
P1141	chr13	43873135	43873339	20.6472	Inducible	Enhancers
P1142	chr13	43873601	43874084	24.9173	Inducible	Enhancers
P1143	chr13	43959690	43960180	1.91384	Constitutive	Enhancers
P1144	chr13	44499205	44499983	1.31306	Inducible	Enhancers
P1145	chr13	44514700	44515023	6.06996	Constitutive	Enhancers
P1146	chr13	44515174	44515508	19.0574	Constitutive	Enhancers
P1147	chr13	44599580	44600156	13.5215	Constitutive	Enhancers
P1148	chr13	44602230	44602610	15.9895	Inducible	Enhancers
P1149	chr13	44602825	44603461	11.7558	Inducible	Enhancers
P1150	chr13	44603693	44604041	13.4555	Inducible	Enhancers
P1151	chr13	44628026	44628692	9.26916	Inducible	Enhancers
P1152	chr13	44630041	44630653	7.31342	Constitutive	Enhancers
P1153	chr13	44630687	44631454	10.449	Constitutive	Enhancers
P1154	chr13	44631577	44632378	20.2715	Constitutive	Enhancers
P1155	chr13	46138409	46139194	2.15671	Constitutive	Enhancers
P1156	chr13	48633420	48633877	4.40624	Constitutive	Enhancers
P1157	chr13	48635614	48635944	0.262411	Constitutive	Enhancers
P1158	chr13	48639001	48639699	-38.5548	Constitutive	Promoters
P1159	chr13	48640671	48642438	-43.9084	Inducible	Promoters
P1160	chr13	48647356	48648410	13.0647	Constitutive	Enhancers
P1161	chr13	49268716	49268904	8.2855	Inducible	Enhancers
P1162	chr13	49273373	49273717	3.2988	Inducible	Enhancers
P1163	chr13	49273727	49274195	4.48562	Inducible	Enhancers
P1164	chr13	49274245	49274720	13.0379	Inducible	Enhancers
P1165	chr13	49346282	49346557	24.3046	Repressed	Enhancers
P1166	chr13	49347324	49348304	16.337	Repressed	Enhancers
P1167	chr13	49416849	49417774	35.0585	Repressed	Enhancers
P1168	chr13	49419013	49419284	38.2848	Repressed	Enhancers
P1169	chr13	49419306	49419485	36.5266	Repressed	Enhancers
P1170	chr13	49419568	49419795	36.9457	Repressed	Enhancers
P1171	chr13	51167180	51167637	-3.73852	Inducible	Promoters
P1172	chr13	51298184	51298414	-1.6574	Constitutive	Promoters
P1173	chr13	51496279	51496467	7.31904	Repressed	Enhancers
P1174	chr13	51496511	51496930	11.7783	Repressed	Enhancers
P1175	chr13	51938042	51938506	11.1126	Constitutive	Enhancers
P1176	chr13	52041692	52042052	16.1187	Repressed	Enhancers
P1177	chr13	52091687	52091887	23.2144	Repressed	Enhancers
P1178	chr13	52156844	52157145	3.23991	Repressed	Enhancers
P1179	chr13	52157192	52157492	4.49178	Repressed	Enhancers
P1180	chr13	52331399	52332303	11.4864	Inducible	Enhancers
P1181	chr13	53119621	53119882	-0.191745	Inducible	Promoters
P1182	chr13	55202763	55203332	13.77	Constitutive	Enhancers
P1183	chr13	55291298	55292029	-17.8637	Constitutive	Promoters
P1184	chr13	55530484	55531283	13.3246	Inducible	Enhancers
P1185	chr13	56282542	56283649	7.90658	Repressed	Enhancers
P1186	chr13	56283663	56285379	4.30387	Repressed	Enhancers
P1187	chr13	56285483	56285820	19.3685	Repressed	Enhancers
P1188	chr13	56435718	56436689	12.5389	Repressed	Enhancers
P1189	chr13	56453467	56453704	12.0244	Repressed	Enhancers
P1190	chr13	56453808	56454703	20.9873	Repressed	Enhancers
P1191	chr13	58168721	58168963	0.829621	Repressed	Enhancers
P1192	chr13	58168998	58169399	1.35613	Repressed	Enhancers
P1193	chr13	58622437	58622654	4.70906	Inducible	Enhancers
P1194	chr13	59936564	59936842	0.414731	Repressed	Enhancers
P1195	chr13	59976960	59977508	15.8619	Repressed	Enhancers
P1196	chr13	59977847	59978039	15.469	Repressed	Enhancers
P1197	chr13	59978101	59978330	14.49	Repressed	Enhancers
P1198	chr13	62117145	62117463	-7.87751	Constitutive	Promoters
P1199	chr13	64503308	64503652	17.9116	Constitutive	Enhancers
P1200	chr13	64523556	64523842	13.0161	Repressed	Enhancers
P1201	chr13	64524252	64524550	18.8177	Repressed	Enhancers
P1202	chr13	65341822	65342552	-67.1142	Constitutive	Promoters
P1203	chr13	65342614	65343021	-73.1515	Constitutive	Promoters
P1204	chr13	65357774	65358076	-2.59489	Constitutive	Promoters
P1205	chr13	65358468	65358732	-5.69358	Repressed	Promoters
P1206	chr13	73596713	73596996	9.00454	Repressed	Enhancers
P1207	chr13	74528133	74528350	-32.9481	Inducible	Promoters
P1208	chr13	74599973	74600982	-34.7603	Constitutive	Promoters
P1209	chr13	74659775	74660316	-20.5314	Repressed	Promoters
P1210	chr13	74660328	74660800	-17.4306	Constitutive	Promoters
P1211	chr13	74666612	74667128	-1.93632	Constitutive	Promoters
P1212	chr13	74701217	74701985	-28.1178	Constitutive	Promoters
P1213	chr13	74754629	74755492	-8.50396	Constitutive	Promoters
P1214	chr13	75960689	75960936	7.30857	Repressed	Enhancers
P1215	chr13	75962156	75962448	24.1711	Repressed	Enhancers
P1216	chr13	83205079	83205274	6.59279	Repressed	Enhancers
P1217	chr13	83213096	83213632	2.19641	Repressed	Enhancers
P1218	chr13	83213642	83214101	-5.41178	Repressed	Promoters
P1219	chr13	83214404	83214928	4.06126	Repressed	Enhancers
P1220	chr13	94000887	94001430	9.34628	Repressed	Enhancers
P1221	chr13	94007752	94008002	7.45563	Repressed	Enhancers
P1222	chr13	94071030	94071389	-28.2281	Inducible	Promoters
P1223	chr13	94747186	94747488	18.0843	Repressed	Enhancers
P1224	chr13	95065760	95066739	16.2545	Constitutive	Enhancers
P1225	chr13	95068528	95068844	21.2947	Repressed	Enhancers
P1226	chr13	95071193	95071394	10.8495	Repressed	Enhancers
P1227	chr13	98212326	98212733	13.4181	Repressed	Enhancers
P1228	chr13	98280817	98281202	13.4448	Inducible	Enhancers
P1229	chr13	98316041	98316280	17.9896	Repressed	Enhancers
P1230	chr13	98329664	98330059	4.7203	Repressed	Enhancers
P1231	chr13	99738174	99738388	2.53074	Repressed	Enhancers
P1232	chr13	99776321	99776525	1.78227	Repressed	Enhancers
P1233	chr13	101636107	101636475	10.2939	Repressed	Enhancers
P1234	chr13	101643638	101643834	3.4028	Repressed	Enhancers
P1235	chr13	102310378	102310998	14.4181	Repressed	Enhancers
P1236	chr13	102428888	102429332	4.39901	Constitutive	Enhancers
P1237	chr13	102433994	102434420	1.36503	Constitutive	Enhancers
P1238	chr13	103473094	103473478	13.5583	Inducible	Enhancers
P1239	chr13	103478179	103478867	4.29639	Inducible	Enhancers
P1240	chr13	103479187	103479849	22.3443	Constitutive	Enhancers
P1241	chr13	105400348	105401318	-17.185	Inducible	Promoters
P1242	chr13	106090057	106090438	4.37356	Repressed	Enhancers
P1243	chr13	106100596	106100790	11.5224	Repressed	Enhancers
P1244	chr13	106100909	106101102	14.8645	Repressed	Enhancers
P1245	chr13	107958611	107959116	-2.02914	Constitutive	Promoters
P1246	chr13	108689796	108690276	15.0527	Repressed	Enhancers
P1247	chr13	108692998	108694250	16.2986	Repressed	Enhancers
P1248	chr13	108694536	108694947	13.1441	Repressed	Enhancers
P1249	chr13	108734916	108736286	25.9111	Repressed	Enhancers
P1250	chr13	108736623	108736840	25.4934	Repressed	Enhancers
P1251	chr13	108744252	108744849	21.6157	Repressed	Enhancers
P1252	chr13	108744933	108745245	15.7346	Repressed	Enhancers
P1253	chr13	109087491	109087794	4.16076	Repressed	Enhancers
P1254	chr13	109288668	109288960	-9.63736	Repressed	Promoters
P1255	chr13	111692663	111692876	13.4706	Repressed	Enhancers
P1256	chr13	111693258	111693740	16.4743	Repressed	Enhancers
P1257	chr13	111732549	111732788	9.854	Repressed	Enhancers
P1258	chr13	112445617	112446033	-0.835164	Inducible	Promoters
P1259	chr13	112674226	112674657	-4.08904	Constitutive	Promoters
P1260	chr13	112685244	112685443	12.6107	Repressed	Enhancers
P1261	chr13	112686375	112686672	11.9384	Repressed	Enhancers
P1262	chr13	112726060	112726659	20.0898	Repressed	Enhancers
P1263	chr13	112770336	112770641	6.86523	Repressed	Enhancers
P1264	chr13	112906157	112906472	4.48524	Constitutive	Enhancers
P1265	chr13	113228314	113228559	5.2677	Repressed	Enhancers
P1266	chr13	113229059	113229548	17.4316	Repressed	Enhancers
P1267	chr13	113229559	113230565	3.5533	Repressed	Enhancers
P1268	chr13	113231105	113231300	14.2925	Repressed	Enhancers
P1269	chr13	113541958	113542319	0.18738	Constitutive	Enhancers
P1270	chr13	114060207	114060425	3.87821	Inducible	Enhancers
P1271	chr13	114208272	114208624	8.71954	Repressed	Enhancers
P1272	chr13	114226609	114226868	1.24805	Repressed	Enhancers
P1273	chr13	114305251	114305612	13.8881	Repressed	Enhancers
P1274	chr13	114426149	114426647	6.07874	Constitutive	Enhancers
P1275	chr13	117822289	117823327	6.53897	Constitutive	Enhancers
P1276	chr14	14813794	14814194	1.28926	Repressed	Enhancers
P1277	chr14	15126961	15127728	-5.65344	Inducible	Promoters
P1278	chr14	15465524	15466568	-23.5746	Inducible	Promoters
P1279	chr14	15472599	15473042	17.1535	Constitutive	Enhancers
P1280	chr14	20804184	20805528	-6.31975	Repressed	Promoters
P1281	chr14	20805629	20806369	12.5634	Repressed	Enhancers
P1282	chr14	21648009	21648360	-0.373311	Repressed	Promoters
P1283	chr14	21648638	21649493	4.55577	Repressed	Enhancers
P1284	chr14	22630512	22630781	18.9557	Repressed	Enhancers
P1285	chr14	22632169	22632367	17.0718	Repressed	Enhancers
P1286	chr14	22632472	22632730	-3.65766	Repressed	Promoters
P1287	chr14	22633079	22633556	22.2716	Repressed	Enhancers
P1288	chr14	22640301	22640677	8.92522	Constitutive	Enhancers
P1289	chr14	22641922	22642798	0.71456	Repressed	Enhancers
P1290	chr14	22812919	22813575	-8.22186	Constitutive	Promoters
P1291	chr14	22818998	22819261	0.471769	Repressed	Enhancers
P1292	chr14	25598440	25599327	-0.638397	Repressed	Promoters
P1293	chr14	26605405	26605633	13.3277	Repressed	Enhancers
P1294	chr14	26608823	26609091	18.3774	Repressed	Enhancers
P1295	chr14	27807456	27807951	-2.26578	Repressed	Promoters
P1296	chr14	30763885	30764231	6.80143	Repressed	Enhancers
P1297	chr14	31447262	31447670	16.5169	Inducible	Enhancers
P1298	chr14	31448268	31448968	30.0733	Inducible	Enhancers
P1299	chr14	32497492	32497721	23.0252	Repressed	Enhancers
P1300	chr14	33511369	33511693	9.75598	Repressed	Enhancers
P1301	chr14	33596158	33596953	7.02968	Repressed	Enhancers
P1302	chr14	33597119	33597749	-50.7603	Repressed	Promoters
P1303	chr14	34007119	34007470	14.7707	Repressed	Enhancers
P1304	chr14	34017034	34017424	9.39716	Repressed	Enhancers
P1305	chr14	35475041	35475348	-28.6108	Constitutive	Promoters
P1306	chr14	45669272	45670376	8.95842	Repressed	Enhancers
P1307	chr14	45945102	45945515	21.484	Repressed	Enhancers
P1308	chr14	47449918	47450253	-109.9	Constitutive	Promoters
P1309	chr14	47970820	47971608	22.7463	Repressed	Enhancers
P1310	chr14	47971642	47972580	26.3089	Repressed	Enhancers
P1311	chr14	47977779	47978066	16.4458	Repressed	Enhancers
P1312	chr14	47978199	47978581	27.1308	Repressed	Enhancers
P1313	chr14	47978839	47979786	14.7912	Repressed	Enhancers
P1314	chr14	47979916	47982157	23.6126	Repressed	Enhancers
P1315	chr14	48064644	48065027	2.49901	Constitutive	Enhancers
P1316	chr14	51512762	51512982	15.2071	Repressed	Enhancers
P1317	chr14	51703623	51704009	-23.0794	Inducible	Promoters
P1318	chr14	51819736	51819985	3.35028	Repressed	Enhancers
P1319	chr14	52560932	52561326	5.56567	Repressed	Enhancers
P1320	chr14	52561824	52562189	8.85262	Repressed	Enhancers
P1321	chr14	52726296	52726882	-4.57049	Repressed	Promoters
P1322	chr14	55495187	55496363	-85.9926	Constitutive	Promoters
P1323	chr14	56265392	56266332	4.08239	Constitutive	Enhancers
P1324	chr14	56343361	56343730	-2.09607	Repressed	Promoters
P1325	chr14	56433731	56434541	-5.9036	Constitutive	Promoters
P1326	chr14	58940139	58940522	3.98426	Inducible	Enhancers
P1327	chr14	58941380	58941685	6.69319	Inducible	Enhancers
P1328	chr14	59878084	59879287	-3.09361	Inducible	Promoters
P1329	chr14	61062217	61062454	17.9038	Repressed	Enhancers
P1330	chr14	61062927	61063275	12.5277	Repressed	Enhancers
P1331	chr14	62137451	62138317	12.8852	Repressed	Enhancers
P1332	chr14	62376049	62376286	2.24792	Repressed	Enhancers
P1333	chr14	62480045	62480405	20.0677	Repressed	Enhancers
P1334	chr14	62589898	62590922	-8.39991	Repressed	Promoters
P1335	chr14	63695228	63695669	6.07497	Repressed	Enhancers
P1336	chr14	63695861	63696260	12.3448	Repressed	Enhancers
P1337	chr14	63696871	63699522	6.37832	Repressed	Enhancers
P1338	chr14	63721425	63721703	6.06373	Repressed	Enhancers
P1339	chr14	63721725	63722288	-3.94539	Repressed	Promoters
P1340	chr14	65258314	65258637	-7.3589	Repressed	Promoters
P1341	chr14	65719127	65721220	32.0968	Repressed	Enhancers
P1342	chr14	65731525	65732133	22.9235	Repressed	Enhancers
P1343	chr14	65732404	65732788	2.62779	Repressed	Enhancers
P1344	chr14	65768475	65768792	-27.7042	Constitutive	Promoters
P1345	chr14	66959550	66959928	8.5961	Repressed	Enhancers
P1346	chr14	67715659	67716067	12.6803	Repressed	Enhancers
P1347	chr14	67716299	67716559	13.2407	Repressed	Enhancers
P1348	chr14	67716591	67717247	24.8265	Repressed	Enhancers
P1349	chr14	68660562	68660787	6.6159	Repressed	Enhancers
P1350	chr14	68666489	68666923	-5.01591	Repressed	Promoters
P1351	chr14	68668743	68669485	-7.34499	Constitutive	Promoters
P1352	chr14	71191008	71191491	5.63626	Repressed	Enhancers
P1353	chr14	71198320	71198797	19.4591	Constitutive	Enhancers
P1354	chr14	73262260	73262462	4.43961	Inducible	Enhancers
P1355	chr14	73458741	73459028	8.31803	Inducible	Enhancers
P1356	chr14	73733884	73734053	17.4004	Repressed	Enhancers
P1357	chr14	73833397	73833747	1.54772	Repressed	Enhancers
P1358	chr14	73841857	73842479	5.29569	Repressed	Enhancers
P1359	chr14	74238851	74239218	6.19648	Repressed	Enhancers
P1360	chr14	75408210	75408415	15.4784	Inducible	Enhancers
P1361	chr14	75465755	75465974	7.92101	Repressed	Enhancers
P1362	chr14	75467795	75468095	-23.9703	Repressed	Promoters
P1363	chr14	75468317	75469188	-3.57424	Repressed	Promoters
P1364	chr14	75469225	75469756	0.167992	Repressed	Enhancers
P1365	chr14	75915859	75916676	4.30546	Inducible	Enhancers
P1366	chr14	76228713	76229099	15.282	Repressed	Enhancers
P1367	chr14	76231756	76232192	-7.30825	Repressed	Promoters
P1368	chr14	76595279	76595493	13.2701	Repressed	Enhancers
P1369	chr14	79163907	79164100	1.26141	Inducible	Enhancers
P1370	chr14	79841168	79841556	6.36323	Repressed	Enhancers
P1371	chr14	87967674	87967948	-6.90734	Inducible	Promoters
P1372	chr14	103205279	103206154	2.35562	Constitutive	Enhancers
P1373	chr14	103234173	103234413	13.8549	Repressed	Enhancers
P1374	chr14	103282755	103282925	4.29041	Repressed	Enhancers
P1375	chr14	103306093	103306496	16.3116	Repressed	Enhancers
P1376	chr14	103411801	103412816	12.6525	Inducible	Enhancers
P1377	chr14	103412966	103413373	8.44106	Inducible	Enhancers
P1378	chr14	103413820	103414792	21.4117	Inducible	Enhancers
P1379	chr14	103414806	103415764	22.4808	Inducible	Enhancers
P1380	chr14	103416766	103417314	13.355	Inducible	Enhancers
P1381	chr14	103419190	103419641	11.6129	Inducible	Enhancers
P1382	chr14	103420148	103420514	11.2118	Inducible	Enhancers
P1383	chr14	103431845	103434138	5.01162	Constitutive	Enhancers
P1384	chr14	103435454	103436162	18.0224	Inducible	Enhancers
P1385	chr14	103436220	103437224	13.6526	Inducible	Enhancers
P1386	chr14	103748620	103749097	-39.0174	Constitutive	Promoters
P1387	chr14	104118474	104118825	-5.53983	Repressed	Promoters
P1388	chr14	106131450	106131823	-4.43431	Repressed	Promoters
P1389	chr14	106321591	106322576	-4.57091	Repressed	Promoters
P1390	chr14	106443790	106443974	-0.226123	Inducible	Promoters
P1391	chr14	106593471	106593713	3.1897	Inducible	Enhancers
P1392	chr14	115347650	115347827	-1.89012	Repressed	Promoters
P1393	chr14	115440547	115441623	-82.6556	Inducible	Promoters
P1394	chr14	118488278	118488718	-97.4567	Constitutive	Promoters
P1395	chr14	118497569	118497903	4.80095	Constitutive	Enhancers
P1396	chr14	120295331	120295642	0.318098	Inducible	Enhancers
P1397	chr14	120662254	120662797	2.57328	Constitutive	Enhancers
P1398	chr14	121161210	121162395	7.61759	Constitutive	Enhancers
P1399	chr14	121231215	121231447	0.37053	Inducible	Enhancers
P1400	chr15	3184042	3184449	11.5958	Repressed	Enhancers
P1401	chr15	4766687	4767432	-13.8146	Inducible	Promoters
P1402	chr15	4771242	4771623	-9.17467	Inducible	Promoters
P1403	chr15	4771829	4772176	-4.82686	Inducible	Promoters
P1404	chr15	5212977	5213245	5.93127	Inducible	Enhancers
P1405	chr15	6209419	6209637	22.7022	Repressed	Enhancers
P1406	chr15	6209693	6210025	19.5396	Repressed	Enhancers
P1407	chr15	6210030	6211115	13.6172	Repressed	Enhancers
P1408	chr15	6472718	6473445	-36.3134	Constitutive	Promoters
P1409	chr15	6490067	6490513	11.6313	Constitutive	Enhancers
P1410	chr15	6491795	6492100	5.33258	Repressed	Enhancers
P1411	chr15	6504562	6505438	10.2292	Repressed	Enhancers
P1412	chr15	6505453	6508004	23.1763	Repressed	Enhancers
P1413	chr15	6513213	6514087	12.7156	Constitutive	Enhancers
P1414	chr15	6514316	6515482	14.296	Repressed	Enhancers
P1415	chr15	6517308	6522892	-95.5355	Constitutive	Promoters
P1416	chr15	6655519	6655854	-71.0206	Inducible	Promoters
P1417	chr15	7035251	7035560	24.2844	Repressed	Enhancers
P1418	chr15	7042466	7042798	6.63876	Repressed	Enhancers
P1419	chr15	8461906	8462369	-13.8486	Repressed	Promoters
P1420	chr15	8519101	8519607	-37.4413	Inducible	Promoters
P1421	chr15	11645893	11646379	6.76121	Repressed	Enhancers
P1422	chr15	12236161	12236787	5.83569	Repressed	Enhancers
P1423	chr15	15019946	15020250	-5.27188	Inducible	Promoters
P1424	chr15	19787208	19787641	0.390536	Repressed	Enhancers
P1425	chr15	25201531	25201891	10.1471	Inducible	Enhancers
P1426	chr15	25758095	25759353	28.9316	Repressed	Enhancers
P1427	chr15	25759485	25759723	12.4335	Repressed	Enhancers
P1428	chr15	25760550	25760849	26.0097	Repressed	Enhancers
P1429	chr15	27617844	27618219	5.98702	Repressed	Enhancers
P1430	chr15	27631860	27633060	11.8404	Repressed	Enhancers
P1431	chr15	27633093	27633481	18.5147	Repressed	Enhancers
P1432	chr15	27633575	27633792	29.1558	Repressed	Enhancers
P1433	chr15	27638914	27639238	34.9735	Repressed	Enhancers
P1434	chr15	28088723	28089268	-21.4354	Inducible	Promoters
P1435	chr15	31347789	31348452	4.3575	Repressed	Enhancers
P1436	chr15	33973539	33973961	10.5123	Inducible	Enhancers
P1437	chr15	33975326	33975712	4.66513	Inducible	Enhancers
P1438	chr15	33975734	33975970	7.39667	Inducible	Enhancers
P1439	chr15	33976108	33977058	4.77218	Inducible	Enhancers
P1440	chr15	33988920	33989164	5.98346	Inducible	Enhancers
P1441	chr15	33996838	33997207	10.8347	Inducible	Enhancers
P1442	chr15	33997598	33997836	0.399636	Inducible	Enhancers
P1443	chr15	34003180	34003316	4.05214	Inducible	Enhancers
P1444	chr15	36264387	36264605	18.6802	Repressed	Enhancers
P1445	chr15	36508258	36508538	-0.829066	Repressed	Promoters
P1446	chr15	36577742	36577962	0.805269	Inducible	Enhancers
P1447	chr15	36579540	36579915	-1.08936	Inducible	Promoters
P1448	chr15	36645489	36645804	0.914795	Inducible	Enhancers
P1449	chr15	38128693	38128963	-2.5475	Repressed	Promoters
P1450	chr15	38174568	38174848	3.01977	Inducible	Enhancers
P1451	chr15	38301405	38301744	12.2028	Repressed	Enhancers
P1452	chr15	38314402	38315250	-11.1342	Repressed	Promoters
P1453	chr15	38387799	38388133	6.36251	Inducible	Enhancers
P1454	chr15	38388176	38388448	4.60162	Inducible	Enhancers
P1455	chr15	38398042	38398732	12.4823	Inducible	Enhancers
P1456	chr15	38398808	38401370	-12.1797	Inducible	Promoters
P1457	chr15	38403002	38403732	-18.7063	Inducible	Promoters
P1458	chr15	38531843	38532174	9.44958	Repressed	Enhancers
P1459	chr15	38573888	38574971	13.9308	Repressed	Enhancers
P1460	chr15	38580105	38580328	11.1031	Repressed	Enhancers
P1461	chr15	38580462	38581079	11.6318	Repressed	Enhancers
P1462	chr15	39788753	39789070	7.75188	Repressed	Enhancers
P1463	chr15	39789291	39789568	9.58693	Repressed	Enhancers
P1464	chr15	39789991	39790204	16.0889	Repressed	Enhancers
P1465	chr15	50192970	50193209	5.58587	Repressed	Enhancers
P1466	chr15	50915482	50915682	5.75976	Repressed	Enhancers
P1467	chr15	53231626	53231841	-9.67931	Repressed	Promoters
P1468	chr15	53231877	53232030	-5.29349	Repressed	Promoters
P1469	chr15	53232124	53232324	-0.742548	Repressed	Promoters
P1470	chr15	57738362	57738679	13.4036	Repressed	Enhancers
P1471	chr15	58565818	58566301	25.6268	Repressed	Enhancers
P1472	chr15	58576898	58577523	26.5897	Repressed	Enhancers
P1473	chr15	58580784	58581031	21.0061	Repressed	Enhancers
P1474	chr15	58586034	58586349	10.8106	Repressed	Enhancers
P1475	chr15	58589895	58590299	20.5729	Repressed	Enhancers
P1476	chr15	58921105	58921659	8.70885	Repressed	Enhancers
P1477	chr15	58977154	58977610	5.04346	Constitutive	Enhancers
P1478	chr15	58990053	58990465	11.3746	Repressed	Enhancers
P1479	chr15	59033536	59034419	10.9138	Repressed	Enhancers
P1480	chr15	59034995	59035246	22.7399	Repressed	Enhancers
P1481	chr15	59552809	59553068	37.5088	Repressed	Enhancers
P1482	chr15	59553085	59553288	25.7268	Repressed	Enhancers
P1483	chr15	59559779	59559994	27.9934	Repressed	Enhancers
P1484	chr15	59560309	59560888	20.767	Repressed	Enhancers
P1485	chr15	59591158	59591691	19.5772	Repressed	Enhancers
P1486	chr15	59591827	59592034	17.3011	Repressed	Enhancers
P1487	chr15	59627269	59627548	12.3314	Repressed	Enhancers
P1488	chr15	59696032	59696780	18.047	Repressed	Enhancers
P1489	chr15	59718977	59719267	2.74641	Repressed	Enhancers
P1490	chr15	59719519	59719935	9.12816	Repressed	Enhancers
P1491	chr15	61834279	61834742	15.7951	Repressed	Enhancers
P1492	chr15	62221096	62221255	12.8637	Repressed	Enhancers
P1493	chr15	62221362	62221549	9.5262	Repressed	Enhancers
P1494	chr15	62224098	62224414	9.22465	Repressed	Enhancers
P1495	chr15	62224989	62225176	3.53587	Repressed	Enhancers
P1496	chr15	63445641	63445920	42.5112	Repressed	Enhancers
P1497	chr15	63446304	63446493	29.5829	Repressed	Enhancers
P1498	chr15	63448072	63448963	14.1066	Repressed	Enhancers
P1499	chr15	63456580	63456843	3.58525	Repressed	Enhancers
P1500	chr15	64373689	64373904	4.64185	Repressed	Enhancers
P1501	chr15	64373930	64374184	12.2311	Repressed	Enhancers
P1502	chr15	66870903	66871613	-1.1167	Constitutive	Promoters
P1503	chr15	67176885	67177282	5.45309	Repressed	Enhancers
P1504	chr15	67612617	67613404	4.50267	Constitutive	Enhancers
P1505	chr15	68151728	68152252	-5.55454	Constitutive	Promoters
P1506	chr15	68192755	68193104	-84.3539	Inducible	Promoters
P1507	chr15	68193511	68195309	-67.5294	Inducible	Promoters
P1508	chr15	72898153	72898501	-2.52282	Constitutive	Promoters
P1509	chr15	73467890	73468111	11.6102	Repressed	Enhancers
P1510	chr15	73475869	73476519	-28.3566	Constitutive	Promoters
P1511	chr15	74748991	74749723	12.7609	Inducible	Enhancers
P1512	chr15	74751198	74752454	27.4259	Inducible	Enhancers
P1513	chr15	74752844	74754307	33.0875	Inducible	Enhancers
P1514	chr15	74756981	74758758	31.4505	Inducible	Enhancers
P1515	chr15	74760581	74764369	0.168947	Inducible	Enhancers
P1516	chr15	74916457	74917529	-48.4121	Constitutive	Promoters
P1517	chr15	75687130	75688311	11.6672	Repressed	Enhancers
P1518	chr15	77705160	77705500	14.6885	Repressed	Enhancers
P1519	chr15	78418446	78418885	30.7639	Repressed	Enhancers
P1520	chr15	78419012	78419225	37.2542	Repressed	Enhancers
P1521	chr15	78419237	78420213	9.36443	Repressed	Enhancers
P1522	chr15	78421346	78421685	21.0496	Repressed	Enhancers
P1523	chr15	78422007	78422606	46.2841	Repressed	Enhancers
P1524	chr15	78646215	78646551	4.13761	Repressed	Enhancers
P1525	chr15	78692653	78692864	-1.37531	Repressed	Promoters
P1526	chr15	78694269	78694785	10.1775	Constitutive	Enhancers
P1527	chr15	79579567	79580088	2.79508	Inducible	Enhancers
P1528	chr15	79704467	79704835	4.8369	Constitutive	Enhancers
P1529	chr15	79854989	79855204	20.9773	Constitutive	Enhancers
P1530	chr15	79855878	79856383	16.9107	Constitutive	Enhancers
P1531	chr15	79860776	79861604	3.94588	Repressed	Enhancers
P1532	chr15	80288375	80288593	13.5984	Repressed	Enhancers
P1533	chr15	80328271	80328417	7.96294	Repressed	Enhancers
P1534	chr15	81341862	81342943	-9.89175	Inducible	Promoters
P1535	chr15	81344244	81345207	5.7867	Inducible	Enhancers
P1536	chr15	81351909	81355026	-67.54	Constitutive	Promoters
P1537	chr15	81363688	81364008	3.72883	Inducible	Enhancers
P1538	chr15	81364406	81365383	6.68365	Inducible	Enhancers
P1539	chr15	81366109	81366969	6.87784	Inducible	Enhancers
P1540	chr15	81399045	81399324	-2.71693	Constitutive	Promoters
P1541	chr15	83046406	83046769	11.4419	Inducible	Enhancers
P1542	chr15	84824947	84825394	23.32	Repressed	Enhancers
P1543	chr15	84825440	84825749	14.7129	Repressed	Enhancers
P1544	chr15	85464596	85465021	-54.45	Constitutive	Promoters
P1545	chr15	85465128	85465962	-18.6759	Constitutive	Promoters
P1546	chr15	86032826	86033403	20.7115	Repressed	Enhancers
P1547	chr15	86033545	86034118	19.5472	Repressed	Enhancers
P1548	chr15	86035019	86035234	20.5917	Repressed	Enhancers
P1549	chr15	88320556	88320780	6.96874	Repressed	Enhancers
P1550	chr15	88320804	88321302	13.7109	Repressed	Enhancers
P1551	chr15	88668074	88668276	-14.0161	Inducible	Promoters
P1552	chr15	93171105	93171846	12.0331	Repressed	Enhancers
P1553	chr15	94421803	94422432	35.3233	Constitutive	Enhancers
P1554	chr15	96305031	96305440	-7.04481	Repressed	Promoters
P1555	chr15	96305969	96306291	6.9591	Repressed	Enhancers
P1556	chr15	96485078	96485636	-0.772069	Repressed	Promoters
P1557	chr15	96485678	96486280	6.45242	Repressed	Enhancers
P1558	chr15	96539630	96540238	-13.0783	Constitutive	Promoters
P1559	chr15	96540242	96541023	-18.241	Constitutive	Promoters
P1560	chr15	96559607	96559840	8.47486	Repressed	Enhancers
P1561	chr15	96587893	96588198	3.15229	Repressed	Enhancers
P1562	chr15	96588304	96588627	5.18706	Repressed	Enhancers
P1563	chr15	97043457	97043873	-5.91639	Inducible	Promoters
P1564	chr15	97494363	97494704	-10.5259	Constitutive	Promoters
P1565	chr15	98314393	98315310	3.12148	Repressed	Enhancers
P1566	chr15	98514262	98514661	14.5417	Constitutive	Enhancers
P1567	chr15	98767257	98768094	-11.9634	Inducible	Promoters
P1568	chr15	99306983	99307181	-8.8221	Constitutive	Promoters
P1569	chr15	100273916	100274425	-1.6056	Constitutive	Promoters
P1570	chr15	100291445	100292579	0.911264	Repressed	Enhancers
P1571	chr15	100909072	100909676	-17.2477	Constitutive	Promoters
P1572	chr15	101076433	101077338	14.5931	Constitutive	Enhancers
P1573	chr15	101092712	101093387	20.4248	Constitutive	Enhancers
P1574	chr15	101901568	101901871	-18.5428	Constitutive	Promoters
P1575	chr15	102207312	102207607	-19.7863	Constitutive	Promoters
P1576	chr15	102229805	102230730	-23.8169	Inducible	Promoters
P1577	chr15	103201088	103201439	27.1433	Inducible	Enhancers
P1578	chr16	3722734	3723651	5.21353	Inducible	Enhancers
P1579	chr16	3729899	3730269	6.51656	Inducible	Enhancers
P1580	chr16	3732345	3732580	2.43835	Inducible	Enhancers
P1581	chr16	3732687	3733241	7.29645	Inducible	Enhancers
P1582	chr16	3733256	3733728	9.36568	Inducible	Enhancers
P1583	chr16	3733954	3734167	1.42539	Inducible	Enhancers
P1584	chr16	4003406	4004423	-60.1551	Constitutive	Promoters
P1585	chr16	4586446	4587379	-0.868982	Constitutive	Promoters
P1586	chr16	5429645	5429847	1.47998	Inducible	Enhancers
P1587	chr16	5430516	5430774	5.4838	Inducible	Enhancers
P1588	chr16	5431262	5432336	8.32537	Inducible	Enhancers
P1589	chr16	10451942	10452244	4.46124	Inducible	Enhancers
P1590	chr16	10452465	10453158	11.8631	Inducible	Enhancers
P1591	chr16	10999585	11000329	24.2674	Repressed	Enhancers
P1592	chr16	11000983	11001245	29.6722	Repressed	Enhancers
P1593	chr16	11004677	11005206	19.9921	Repressed	Enhancers
P1594	chr16	11005978	11007207	21.2034	Repressed	Enhancers
P1595	chr16	11177510	11177881	-95.5016	Constitutive	Promoters
P1596	chr16	11343279	11343863	25.4899	Repressed	Enhancers
P1597	chr16	13239077	13240069	9.90868	Repressed	Enhancers
P1598	chr16	13246341	13246549	3.66446	Repressed	Enhancers
P1599	chr16	13246958	13247840	-1.10776	Repressed	Promoters
P1600	chr16	13754465	13755289	-17.4267	Inducible	Promoters
P1601	chr16	14352857	14353145	11.2152	Repressed	Enhancers
P1602	chr16	14358520	14359450	17.558	Repressed	Enhancers
P1603	chr16	18687119	18687486	1.41372	Constitutive	Enhancers
P1604	chr16	18733053	18733619	-7.64451	Inducible	Promoters
P1605	chr16	19912788	19913080	2.0914	Inducible	Enhancers
P1606	chr16	21310746	21311440	-7.75339	Repressed	Promoters
P1607	chr16	21332973	21334066	-51.6277	Constitutive	Promoters
P1608	chr16	21339578	21339785	16.8181	Repressed	Enhancers
P1609	chr16	21382404	21382631	25.8144	Repressed	Enhancers
P1610	chr16	22358813	22359288	14.9795	Constitutive	Enhancers
P1611	chr16	22444875	22445231	25.0267	Repressed	Enhancers
P1612	chr16	23897607	23898457	-4.88676	Inducible	Promoters
P1613	chr16	23992273	23992674	18.2486	Inducible	Enhancers
P1614	chr16	23993145	23993464	-0.475546	Inducible	Promoters
P1615	chr16	23993471	23994655	9.90381	Inducible	Enhancers
P1616	chr16	23994664	23994896	10.6866	Inducible	Enhancers
P1617	chr16	23999067	23999272	-1.16156	Inducible	Promoters
P1618	chr16	23999347	23999786	5.06038	Inducible	Enhancers
P1619	chr16	24000519	24000717	5.75318	Inducible	Enhancers
P1620	chr16	24027373	24027617	1.7593	Inducible	Enhancers
P1621	chr16	24028088	24028288	4.17211	Inducible	Enhancers
P1622	chr16	24151672	24151924	33.8833	Repressed	Enhancers
P1623	chr16	24151942	24152263	18.1282	Repressed	Enhancers
P1624	chr16	25011278	25013522	14.5511	Constitutive	Enhancers
P1625	chr16	25016250	25017348	18.9675	Inducible	Enhancers
P1626	chr16	25017738	25018363	7.02578	Inducible	Enhancers
P1627	chr16	25022623	25023011	16.1883	Inducible	Enhancers
P1628	chr16	25023055	25023567	11.1439	Inducible	Enhancers
P1629	chr16	25023788	25025017	14.5071	Inducible	Enhancers
P1630	chr16	25025141	25025546	14.3889	Inducible	Enhancers
P1631	chr16	25026399	25028237	5.75762	Inducible	Enhancers
P1632	chr16	25040640	25041787	12.0653	Constitutive	Enhancers
P1633	chr16	25041812	25046600	-2.10832	Constitutive	Promoters
P1634	chr16	25046957	25048572	15.9997	Constitutive	Enhancers
P1635	chr16	25048989	25051831	13.3542	Constitutive	Enhancers
P1636	chr16	28972631	28972812	5.3364	Inducible	Enhancers
P1637	chr16	30008794	30009308	-14.0786	Inducible	Promoters
P1638	chr16	30184801	30185586	13.0444	Repressed	Enhancers
P1639	chr16	30185976	30187682	6.3268	Repressed	Enhancers
P1640	chr16	30187784	30188546	1.20057	Repressed	Enhancers
P1641	chr16	30776177	30777004	25.6417	Repressed	Enhancers
P1642	chr16	30787611	30787870	18.1592	Repressed	Enhancers
P1643	chr16	30789222	30789631	28.481	Repressed	Enhancers
P1644	chr16	31210154	31210340	5.21383	Inducible	Enhancers
P1645	chr16	31233781	31234602	-19.1589	Constitutive	Promoters
P1646	chr16	31235568	31236039	7.46648	Inducible	Enhancers
P1647	chr16	31507032	31507306	1.04181	Repressed	Enhancers
P1648	chr16	32124580	32125106	4.76891	Inducible	Enhancers
P1649	chr16	32129544	32130761	22.3543	Constitutive	Enhancers
P1650	chr16	32170823	32172037	15.9312	Repressed	Enhancers
P1651	chr16	32176890	32177943	3.33433	Constitutive	Enhancers
P1652	chr16	32202673	32203010	13.8139	Constitutive	Enhancers
P1653	chr16	32324052	32324266	2.0708	Repressed	Enhancers
P1654	chr16	33178325	33178534	11.6558	Repressed	Enhancers
P1655	chr16	33178603	33178924	3.45441	Repressed	Enhancers
P1656	chr16	35888214	35888713	1.40032	Inducible	Enhancers
P1657	chr16	35888981	35889801	-0.576227	Inducible	Promoters
P1658	chr16	35903329	35903663	3.04048	Inducible	Enhancers
P1659	chr16	35904704	35904942	10.2677	Inducible	Enhancers
P1660	chr16	35905549	35905844	-0.0588485	Inducible	Promoters
P1661	chr16	35906168	35906512	8.8978	Inducible	Enhancers
P1662	chr16	36669637	36669928	3.16011	Inducible	Enhancers
P1663	chr16	42676689	42676991	1.73287	Repressed	Enhancers
P1664	chr16	44063250	44063469	-13.6474	Repressed	Promoters
P1665	chr16	45005408	45005655	13.9137	Repressed	Enhancers
P1666	chr16	45032973	45033171	8.06189	Inducible	Enhancers
P1667	chr16	49504167	49504595	2.99332	Constitutive	Enhancers
P1668	chr16	49839581	49840879	1.60054	Constitutive	Enhancers
P1669	chr16	49938548	49938860	0.653727	Constitutive	Enhancers
P1670	chr16	49969824	49970046	14.2264	Repressed	Enhancers
P1671	chr16	49970172	49971855	17.7715	Repressed	Enhancers
P1672	chr16	49982275	49982905	11.5945	Repressed	Enhancers
P1673	chr16	50096468	50096934	5.60601	Repressed	Enhancers
P1674	chr16	51929301	51929510	5.07554	Repressed	Enhancers
P1675	chr16	51929859	51930290	4.1854	Repressed	Enhancers
P1676	chr16	52467297	52467555	8.79603	Repressed	Enhancers
P1677	chr16	52467681	52468303	17.8967	Repressed	Enhancers
P1678	chr16	52468316	52469075	6.83288	Repressed	Enhancers
P1679	chr16	52469354	52469638	5.52531	Repressed	Enhancers
P1680	chr16	52470326	52470597	16.8457	Repressed	Enhancers
P1681	chr16	52470622	52470976	14.3159	Repressed	Enhancers
P1682	chr16	52474369	52474584	7.31894	Repressed	Enhancers
P1683	chr16	55555354	55555732	5.87959	Repressed	Enhancers
P1684	chr16	55636788	55637309	13.5433	Inducible	Enhancers
P1685	chr16	55641160	55641454	0.596975	Inducible	Enhancers
P1686	chr16	55698872	55699158	5.54521	Repressed	Enhancers
P1687	chr16	55754368	55754857	7.26285	Constitutive	Enhancers
P1688	chr16	59600180	59601134	-37.5324	Inducible	Promoters
P1689	chr16	64873157	64874068	-31.8518	Inducible	Promoters
P1690	chr16	64883793	64884060	4.25899	Constitutive	Enhancers
P1691	chr16	64884146	64884412	2.77789	Repressed	Enhancers
P1692	chr16	65486278	65486415	1.70762	Inducible	Enhancers
P1693	chr16	75961889	75962073	7.53302	Repressed	Enhancers
P1694	chr16	75962290	75962475	-1.28054	Repressed	Promoters
P1695	chr16	76527981	76528168	0.02254	Repressed	Enhancers
P1696	chr16	76604442	76604622	-3.53672	Repressed	Promoters
P1697	chr16	78217211	78217568	-21.4383	Repressed	Promoters
P1698	chr16	78217834	78218303	-19.677	Repressed	Promoters
P1699	chr16	78490395	78490883	-9.67149	Repressed	Promoters
P1700	chr16	84583449	84585511	3.81033	Inducible	Enhancers
P1701	chr16	84585981	84586558	2.21245	Inducible	Enhancers
P1702	chr16	84590775	84591076	2.69458	Inducible	Enhancers
P1703	chr16	84603601	84603834	2.89483	Inducible	Enhancers
P1704	chr16	84603968	84604271	1.65867	Inducible	Enhancers
P1705	chr16	84604586	84604899	7.69011	Inducible	Enhancers
P1706	chr16	84605653	84606576	2.60261	Inducible	Enhancers
P1707	chr16	84606615	84607468	6.78692	Inducible	Enhancers
P1708	chr16	84607768	84607991	4.33388	Inducible	Enhancers
P1709	chr16	84608121	84608376	3.54877	Inducible	Enhancers
P1710	chr16	84608818	84609205	1.15616	Inducible	Enhancers
P1711	chr16	84614920	84615380	1.84726	Inducible	Enhancers
P1712	chr16	84615574	84615792	0.331041	Inducible	Enhancers
P1713	chr16	84620179	84620476	-4.82568	Inducible	Promoters
P1714	chr16	84620652	84621385	-8.81978	Inducible	Promoters
P1715	chr16	84621479	84621807	-1.2339	Inducible	Promoters
P1716	chr16	84621985	84622414	-8.93669	Inducible	Promoters
P1717	chr16	84622768	84623014	-16.0637	Inducible	Promoters
P1718	chr16	85804428	85804806	-14.1191	Constitutive	Promoters
P1719	chr16	87625074	87625879	5.3114	Repressed	Enhancers
P1720	chr16	87634899	87635360	10.4993	Inducible	Enhancers
P1721	chr16	87661442	87662222	-3.98273	Inducible	Promoters
P1722	chr16	90197700	90197969	-0.691945	Repressed	Promoters
P1723	chr16	90197990	90198313	7.24562	Repressed	Enhancers
P1724	chr16	90677395	90677992	0.67708	Repressed	Enhancers
P1725	chr16	91347709	91347881	9.7521	Repressed	Enhancers
P1726	chr16	91353337	91353728	32.1197	Repressed	Enhancers
P1727	chr16	91353951	91354806	15.5273	Repressed	Enhancers
P1728	chr16	91354815	91356194	18.2363	Repressed	Enhancers
P1729	chr16	91356262	91356441	22.1212	Repressed	Enhancers
P1730	chr16	91359476	91359718	16.4235	Repressed	Enhancers
P1731	chr16	91366883	91367840	20.7639	Repressed	Enhancers
P1732	chr16	91452301	91452581	22.5735	Repressed	Enhancers
P1733	chr16	91452641	91453082	28.1673	Repressed	Enhancers
P1734	chr16	91461128	91461980	2.32119	Repressed	Enhancers
P1735	chr16	91462122	91462579	-13.4258	Constitutive	Promoters
P1736	chr16	91483970	91484534	-64.5306	Constitutive	Promoters
P1737	chr16	91521453	91521700	27.9048	Repressed	Enhancers
P1738	chr16	91521863	91524670	14.7119	Repressed	Enhancers
P1739	chr16	91526749	91527035	21.149	Repressed	Enhancers
P1740	chr16	91933350	91933709	-23.0454	Inducible	Promoters
P1741	chr16	91963401	91963771	8.56424	Repressed	Enhancers
P1742	chr16	91964590	91965162	14.0788	Constitutive	Enhancers
P1743	chr16	92019498	92019726	13.6381	Repressed	Enhancers
P1744	chr16	92572834	92573977	23.2561	Repressed	Enhancers
P1745	chr16	92864479	92864883	11.3947	Repressed	Enhancers
P1746	chr16	92867722	92869037	13.498	Repressed	Enhancers
P1747	chr16	93028717	93029240	5.65239	Constitutive	Enhancers
P1748	chr16	93031279	93031672	21.0372	Repressed	Enhancers
P1749	chr16	93083981	93084326	7.67351	Inducible	Enhancers
P1750	chr16	93084613	93085640	22.9029	Inducible	Enhancers
P1751	chr16	93085850	93086213	8.18039	Inducible	Enhancers
P1752	chr16	93140880	93141197	1.53797	Inducible	Enhancers
P1753	chr16	93141912	93142565	6.43977	Inducible	Enhancers
P1754	chr16	93189863	93190108	6.23804	Inducible	Enhancers
P1755	chr16	93191238	93191939	4.11848	Inducible	Enhancers
P1756	chr16	93192213	93192712	-0.969486	Inducible	Promoters
P1757	chr16	94534143	94535366	-40.9724	Constitutive	Promoters
P1758	chr16	94767508	94767707	1.72604	Inducible	Enhancers
P1759	chr16	94767785	94768139	8.13352	Inducible	Enhancers
P1760	chr16	94780872	94781362	9.11179	Repressed	Enhancers
P1761	chr16	94945603	94946278	-40.7445	Constitutive	Promoters
P1762	chr16	95970642	95970926	4.72148	Inducible	Enhancers
P1763	chr16	95972098	95972302	14.157	Inducible	Enhancers
P1764	chr16	96004386	96004497	2.07003	Inducible	Enhancers
P1765	chr16	96035436	96035909	29.4452	Repressed	Enhancers
P1766	chr16	96036039	96036506	18.0389	Repressed	Enhancers
P1767	chr16	96037101	96037316	14.0325	Repressed	Enhancers
P1768	chr16	96151069	96153320	10.5919	Repressed	Enhancers
P1769	chr16	96153326	96154211	23.238	Repressed	Enhancers
P1770	chr16	96177436	96177635	6.54491	Repressed	Enhancers
P1771	chr17	4907869	4908866	-6.80573	Inducible	Promoters
P1772	chr17	5768850	5769065	11.074	Repressed	Enhancers
P1773	chr17	5770183	5770952	-2.95206	Repressed	Promoters
P1774	chr17	5784121	5784343	14.9881	Repressed	Enhancers
P1775	chr17	5798324	5798831	25.0385	Repressed	Enhancers
P1776	chr17	8417961	8418323	6.11363	Repressed	Enhancers
P1777	chr17	8698837	8699154	6.68954	Repressed	Enhancers
P1778	chr17	10234112	10234427	3.87233	Repressed	Enhancers
P1779	chr17	10514700	10515186	-16.0501	Constitutive	Promoters
P1780	chr17	10527861	10528557	-24.2083	Repressed	Promoters
P1781	chr17	10552185	10552691	12.6925	Repressed	Enhancers
P1782	chr17	10563270	10563999	16.8052	Repressed	Enhancers
P1783	chr17	15794216	15794475	5.05554	Repressed	Enhancers
P1784	chr17	17141933	17142270	-20.2885	Constitutive	Promoters
P1785	chr17	17371439	17372114	-27.324	Constitutive	Promoters
P1786	chr17	17999339	17999785	8.84745	Inducible	Enhancers
P1787	chr17	17999940	18000264	9.19566	Inducible	Enhancers
P1788	chr17	18001978	18002734	23.9047	Inducible	Enhancers
P1789	chr17	18002757	18003428	15.162	Inducible	Enhancers
P1790	chr17	21615349	21615878	0.458973	Repressed	Enhancers
P1791	chr17	21816545	21817160	-2.94753	Constitutive	Promoters
P1792	chr17	22362450	22362742	-6.20085	Inducible	Promoters
P1793	chr17	22451565	22452166	-14.0999	Constitutive	Promoters
P1794	chr17	23790549	23792009	6.95339	Inducible	Enhancers
P1795	chr17	24143851	24144980	13.8041	Constitutive	Enhancers
P1796	chr17	24916423	24917003	-0.319123	Repressed	Promoters
P1797	chr17	24917810	24917956	14.0819	Repressed	Enhancers
P1798	chr17	24940832	24941436	-22.9058	Repressed	Promoters
P1799	chr17	25320096	25320721	-53.766	Constitutive	Promoters
P1800	chr17	25419110	25419560	-2.28813	Constitutive	Promoters
P1801	chr17	26238302	26238548	13.7865	Repressed	Enhancers
P1802	chr17	26238566	26238771	11.237	Repressed	Enhancers
P1803	chr17	26649385	26650440	21.5349	Constitutive	Enhancers
P1804	chr17	26650494	26651199	16.45	Repressed	Enhancers
P1805	chr17	26651239	26651473	36.3106	Repressed	Enhancers
P1806	chr17	26651499	26652125	24.9533	Repressed	Enhancers
P1807	chr17	26669755	26670005	34.023	Repressed	Enhancers
P1808	chr17	26670304	26670521	41.0577	Repressed	Enhancers
P1809	chr17	26671162	26671603	46.262	Repressed	Enhancers
P1810	chr17	26671683	26673136	43.6135	Repressed	Enhancers
P1811	chr17	26675077	26675454	24.3798	Repressed	Enhancers
P1812	chr17	27188437	27188870	6.92023	Inducible	Enhancers
P1813	chr17	27310484	27310869	25.6022	Repressed	Enhancers
P1814	chr17	27664109	27664515	1.51321	Constitutive	Enhancers
P1815	chr17	27683677	27684794	14.6925	Inducible	Enhancers
P1816	chr17	27689440	27690174	15.7796	Constitutive	Enhancers
P1817	chr17	27780058	27780301	4.30168	Repressed	Enhancers
P1818	chr17	27961802	27964312	-12.4807	Inducible	Promoters
P1819	chr17	29217631	29219561	-32.4613	Inducible	Promoters
P1820	chr17	29250988	29251288	2.12732	Repressed	Enhancers
P1821	chr17	29529543	29536549	11.8199	Inducible	Enhancers
P1822	chr17	29552649	29553588	4.31014	Inducible	Enhancers
P1823	chr17	29567797	29574943	2.76254	Inducible	Enhancers
P1824	chr17	29575018	29575932	-46.7632	Inducible	Promoters
P1825	chr17	29576603	29578374	13.3798	Inducible	Enhancers
P1826	chr17	29578397	29580307	15.0507	Inducible	Enhancers
P1827	chr17	29580623	29580938	10.6274	Inducible	Enhancers
P1828	chr17	29580947	29581130	16.6231	Inducible	Enhancers
P1829	chr17	29596498	29596968	4.93016	Inducible	Enhancers
P1830	chr17	29625312	29627560	-146.636	Inducible	Promoters
P1831	chr17	29650326	29650533	1.64853	Inducible	Enhancers
P1832	chr17	31175311	31176164	22.6533	Constitutive	Enhancers
P1833	chr17	31176533	31177057	6.21677	Inducible	Enhancers
P1834	chr17	31427821	31428216	11.1792	Repressed	Enhancers
P1835	chr17	31970700	31971185	13.9855	Repressed	Enhancers
P1836	chr17	32042496	32043156	5.09286	Repressed	Enhancers
P1837	chr17	32665536	32665844	-2.8015	Inducible	Promoters
P1838	chr17	34307993	34308581	-3.86218	Constitutive	Promoters
P1839	chr17	35020090	35020693	7.4793	Constitutive	Enhancers
P1840	chr17	35344505	35345004	6.42376	Inducible	Enhancers
P1841	chr17	35345021	35345858	11.5196	Inducible	Enhancers
P1842	chr17	35346430	35347081	12.0176	Constitutive	Enhancers
P1843	chr17	35903501	35903711	7.52177	Repressed	Enhancers
P1844	chr17	35914286	35914608	17.7876	Repressed	Enhancers
P1845	chr17	35916712	35916889	29.988	Repressed	Enhancers
P1846	chr17	35949945	35951275	28.5544	Constitutive	Enhancers
P1847	chr17	36342690	36342952	-19.9841	Inducible	Promoters
P1848	chr17	36355473	36355764	8.45202	Repressed	Enhancers
P1849	chr17	37628993	37629207	0.500102	Repressed	Enhancers
P1850	chr17	37662735	37662948	8.97606	Repressed	Enhancers
P1851	chr17	43024221	43024573	-3.09425	Inducible	Promoters
P1852	chr17	43674003	43674515	2.30872	Inducible	Enhancers
P1853	chr17	43676022	43676285	6.13742	Inducible	Enhancers
P1854	chr17	43694395	43695042	10.6527	Constitutive	Enhancers
P1855	chr17	44487534	44487764	11.9873	Repressed	Enhancers
P1856	chr17	45755927	45757116	-32.8543	Inducible	Promoters
P1857	chr17	45872736	45874318	-5.30855	Constitutive	Promoters
P1858	chr17	45888971	45890310	24.0072	Repressed	Enhancers
P1859	chr17	45890558	45890847	4.47876	Repressed	Enhancers
P1860	chr17	45944531	45944825	3.26412	Constitutive	Enhancers
P1861	chr17	46477974	46478632	1.03153	Constitutive	Enhancers
P1862	chr17	46988782	46989263	-2.92983	Constitutive	Promoters
P1863	chr17	46989407	46990721	-5.6326	Constitutive	Promoters
P1864	chr17	46990793	46995780	-36.7988	Constitutive	Promoters
P1865	chr17	47003730	47004319	11.3319	Repressed	Enhancers
P1866	chr17	47011036	47011350	18.6511	Constitutive	Enhancers
P1867	chr17	47016604	47017410	13.6234	Repressed	Enhancers
P1868	chr17	47026127	47026848	-93.4539	Constitutive	Promoters
P1869	chr17	47979164	47979380	2.13704	Repressed	Enhancers
P1870	chr17	47979413	47979726	4.63464	Repressed	Enhancers
P1871	chr17	48477145	48477389	15.7773	Repressed	Enhancers
P1872	chr17	50471126	50471496	8.28969	Repressed	Enhancers
P1873	chr17	50554959	50555164	12.3585	Repressed	Enhancers
P1874	chr17	50609610	50610309	-12.3848	Constitutive	Promoters
P1875	chr17	50610575	50610964	-18.4367	Constitutive	Promoters
P1876	chr17	57478233	57479257	28.2297	Inducible	Enhancers
P1877	chr17	57486368	57487552	8.61999	Constitutive	Enhancers
P1878	chr17	64198838	64199358	-12.4554	Constitutive	Promoters
P1879	chr17	71527912	71528757	9.95488	Inducible	Enhancers
P1880	chr17	73144702	73145064	8.00943	Repressed	Enhancers
P1881	chr17	73358213	73358464	8.19109	Repressed	Enhancers
P1882	chr17	74319911	74321176	20.553	Constitutive	Enhancers
P1883	chr17	75836283	75836494	10.7068	Repressed	Enhancers
P1884	chr17	78818450	78818933	-29.2738	Inducible	Promoters
P1885	chr17	79842093	79842351	4.08587	Repressed	Enhancers
P1886	chr17	79997463	79997694	10.9672	Repressed	Enhancers
P1887	chr17	79999265	79999474	8.85688	Repressed	Enhancers
P1888	chr17	80185957	80186346	6.80072	Repressed	Enhancers
P1889	chr17	80512067	80512691	5.80445	Repressed	Enhancers
P1890	chr17	81172050	81172262	6.8533	Repressed	Enhancers
P1891	chr17	81200727	81201187	7.24151	Repressed	Enhancers
P1892	chr17	83666695	83667107	4.6782	Repressed	Enhancers
P1893	chr17	83673163	83673957	0.210912	Inducible	Enhancers
P1894	chr17	83675098	83677480	-27.3267	Inducible	Promoters
P1895	chr17	83711903	83712265	10.1831	Constitutive	Enhancers
P1896	chr17	83926442	83926867	-0.231016	Constitutive	Promoters
P1897	chr17	83926949	83927514	1.2545	Repressed	Enhancers
P1898	chr17	84044688	84045085	5.32107	Constitutive	Enhancers
P1899	chr17	84260798	84262150	-64.7801	Constitutive	Promoters
P1900	chr17	84456129	84457137	14.4384	Constitutive	Enhancers
P1901	chr17	84467578	84468125	1.31076	Inducible	Enhancers
P1902	chr17	84468291	84468479	7.02261	Inducible	Enhancers
P1903	chr17	84481327	84481963	10.8681	Inducible	Enhancers
P1904	chr17	84482037	84482287	7.70648	Inducible	Enhancers
P1905	chr17	84482595	84482950	7.08767	Inducible	Enhancers
P1906	chr17	84483359	84483762	15.8319	Inducible	Enhancers
P1907	chr17	84499746	84500414	33.8816	Constitutive	Enhancers
P1908	chr17	84500626	84501061	34.4509	Repressed	Enhancers
P1909	chr17	84501102	84501514	47.5961	Repressed	Enhancers
P1910	chr17	84502552	84502913	33.8103	Repressed	Enhancers
P1911	chr17	84502950	84503527	27.8989	Repressed	Enhancers
P1912	chr17	84507392	84507837	11.4953	Constitutive	Enhancers
P1913	chr17	84513408	84513717	25.7457	Repressed	Enhancers
P1914	chr17	84513763	84514000	26.0347	Repressed	Enhancers
P1915	chr17	84514853	84515194	41.119	Repressed	Enhancers
P1916	chr17	84515202	84515474	29.8517	Repressed	Enhancers
P1917	chr17	84515483	84516817	46.4792	Repressed	Enhancers
P1918	chr17	84516862	84520305	31.0812	Repressed	Enhancers
P1919	chr17	84520312	84521128	21.399	Repressed	Enhancers
P1920	chr17	84521578	84521994	22.131	Repressed	Enhancers
P1921	chr17	84522515	84522838	-5.14875	Repressed	Promoters
P1922	chr17	84522985	84523274	-9.31581	Repressed	Promoters
P1923	chr17	84540144	84541126	20.7135	Repressed	Enhancers
P1924	chr17	84541422	84541606	24.5605	Repressed	Enhancers
P1925	chr17	84548292	84548590	23.8402	Repressed	Enhancers
P1926	chr17	85259267	85259420	3.80995	Repressed	Enhancers
P1927	chr17	86563254	86563507	0.331618	Inducible	Enhancers
P1928	chr17	86563627	86564130	-51.3651	Inducible	Promoters
P1929	chr17	87076803	87076975	9.91706	Repressed	Enhancers
P1930	chr17	87131341	87131870	5.26024	Constitutive	Enhancers
P1931	chr17	87144113	87144437	1.54127	Repressed	Enhancers
P1932	chr17	87569655	87569880	10.1981	Repressed	Enhancers
P1933	chr17	87858346	87858532	-2.00105	Repressed	Promoters
P1934	chr17	87858602	87859007	-3.32295	Repressed	Promoters
P1935	chr17	87930231	87931833	-4.42407	Constitutive	Promoters
P1936	chr17	88532119	88532728	3.3723	Repressed	Enhancers
P1937	chr17	88737031	88737302	7.73515	Repressed	Enhancers
P1938	chr17	88839517	88839934	-58.1488	Constitutive	Promoters
P1939	chr17	88908237	88909041	5.06334	Constitutive	Enhancers
P1940	chr17	88928122	88928691	-22.6798	Constitutive	Promoters
P1941	chr17	95263814	95264507	-38.7904	Inducible	Promoters
P1942	chr18	4313746	4314097	27.7724	Repressed	Enhancers
P1943	chr18	4314136	4314357	11.581	Repressed	Enhancers
P1944	chr18	4803961	4804264	4.97258	Repressed	Enhancers
P1945	chr18	4873229	4873425	12.7301	Repressed	Enhancers
P1946	chr18	4873429	4873673	16.0958	Repressed	Enhancers
P1947	chr18	4908189	4908596	10.2373	Repressed	Enhancers
P1948	chr18	4908818	4909038	12.6451	Repressed	Enhancers
P1949	chr18	5133904	5134170	19.847	Repressed	Enhancers
P1950	chr18	5134222	5134763	24.1829	Repressed	Enhancers
P1951	chr18	5141420	5141811	6.53159	Repressed	Enhancers
P1952	chr18	5141831	5142020	21.8799	Repressed	Enhancers
P1953	chr18	5142046	5142253	17.0498	Repressed	Enhancers
P1954	chr18	5142304	5142701	17.0211	Repressed	Enhancers
P1955	chr18	5162088	5163944	-33.5459	Inducible	Promoters
P1956	chr18	5344886	5345172	9.40618	Repressed	Enhancers
P1957	chr18	5809523	5809696	5.10224	Inducible	Enhancers
P1958	chr18	5819654	5820078	1.36847	Inducible	Enhancers
P1959	chr18	5989444	5990262	-14.0363	Inducible	Promoters
P1960	chr18	6144831	6145100	1.84191	Repressed	Enhancers
P1961	chr18	7692901	7693536	-11.7158	Constitutive	Promoters
P1962	chr18	8377032	8377339	1.54249	Constitutive	Enhancers
P1963	chr18	9489963	9490197	3.65948	Repressed	Enhancers
P1964	chr18	9552542	9552720	4.53738	Repressed	Enhancers
P1965	chr18	9553050	9553310	6.05124	Repressed	Enhancers
P1966	chr18	11221774	11221986	2.3178	Repressed	Enhancers
P1967	chr18	11288615	11288862	-1.25778	Inducible	Promoters
P1968	chr18	11510444	11511248	-7.21175	Repressed	Promoters
P1969	chr18	11952591	11953406	8.43535	Repressed	Enhancers
P1970	chr18	13113970	13114920	-50.0928	Constitutive	Promoters
P1971	chr18	13279742	13279924	2.00825	Repressed	Enhancers
P1972	chr18	13280767	13281114	3.53806	Repressed	Enhancers
P1973	chr18	20945000	20945648	20.2473	Repressed	Enhancers
P1974	chr18	20945694	20945901	14.7348	Repressed	Enhancers
P1975	chr18	20946038	20946414	19.6599	Repressed	Enhancers
P1976	chr18	20959525	20960253	12.429	Repressed	Enhancers
P1977	chr18	20960261	20960610	29.2219	Repressed	Enhancers
P1978	chr18	32307014	32307619	6.93249	Repressed	Enhancers
P1979	chr18	34277622	34277944	0.764927	Repressed	Enhancers
P1980	chr18	34537437	34537834	21.2488	Constitutive	Enhancers
P1981	chr18	34538034	34538345	16.724	Repressed	Enhancers
P1982	chr18	34540248	34540426	12.9071	Repressed	Enhancers
P1983	chr18	35046232	35046449	-11.1118	Repressed	Promoters
P1984	chr18	35046659	35047180	8.96351	Repressed	Enhancers
P1985	chr18	35047207	35047488	-5.9674	Repressed	Promoters
P1986	chr18	35114229	35115964	-18.5884	Constitutive	Promoters
P1987	chr18	35117930	35118873	-9.20294	Repressed	Promoters
P1988	chr18	35904873	35905684	3.61641	Inducible	Enhancers
P1989	chr18	35911505	35912128	-9.51784	Inducible	Promoters
P1990	chr18	36032860	36033979	-21.4474	Inducible	Promoters
P1991	chr18	36099218	36099571	-15.9217	Repressed	Promoters
P1992	chr18	36101174	36102939	-10.1923	Constitutive	Promoters
P1993	chr18	36488268	36488808	1.19174	Repressed	Enhancers
P1994	chr18	36631932	36632197	7.33856	Repressed	Enhancers
P1995	chr18	36857921	36858375	8.76774	Repressed	Enhancers
P1996	chr18	36859078	36862368	25.3739	Repressed	Enhancers
P1997	chr18	36865403	36865722	4.61682	Repressed	Enhancers
P1998	chr18	36866253	36867849	11.9158	Repressed	Enhancers
P1999	chr18	36867894	36868977	9.98124	Repressed	Enhancers
[truncated: 2,232 more rows]

## Sheet: Unpredictable_regions
Chromosome	Start	End
chr1	16759162	16759409
chr1	53798398	53798612
chr1	87423152	87423330
chr1	103788699	103788977
chr1	103789484	103789846
chr1	103790147	103790626
chr1	130637685	130637870
chr1	137126804	137127103
chr1	138586796	138587082
chr1	152098938	152099138
chr1	154529877	154530142
chr1	157825399	157825686
chr1	157828210	157828460
chr1	158274525	158274870
chr1	173252144	173252811
chr1	173428845	173429552
chr1	174320962	174321271
chr1	175421247	175421546
chr1	175467265	175467469
chr1	175552613	175552975
chr1	175558774	175559201
chr1	175559340	175559621
chr1	179183285	179183491
chr1	183548824	183548943
chr10	22772248	22772465
chr10	51124687	51124953
chr10	51125073	51125327
chr10	51162823	51163390
chr10	51253189	51253699
chr10	51254614	51254790
chr10	51257287	51258231
chr10	51260680	51261134
chr10	62809745	62810019
chr10	87537526	87537858
chr10	90662222	90662454
chr10	96153174	96153381
chr10	96153448	96153718
chr10	98538896	98539111
chr10	121071356	121071560
chr10	121553642	121554027
chr11	11440064	11440314
chr11	22662552	22662900
chr11	22663050	22663292
chr11	22663593	22663929
chr11	22664448	22664682
chr11	22664761	22665704
chr11	22666240	22666477
chr11	43214002	43214235
chr11	46615176	46615660
chr11	46615908	46616177
chr11	48825606	48825777
chr11	48826774	48827046
chr11	48827936	48828166
chr11	48828455	48828801
chr11	48832171	48832443
chr11	59446692	59447008
chr11	78689425	78689802
chr11	78689828	78690029
chr11	78690120	78690393
chr11	78696944	78697199
chr11	83088245	83088664
chr11	83088909	83089435
chr11	86623954	86625314
chr11	86629335	86629462
chr11	101519235	101522958
chr11	102608090	102608514
chr11	119285149	119286850
chr11	119301833	119305709
chr11	119305920	119308711
chr11	119308774	119309316
chr11	119309747	119310512
chr11	120387270	120387804
chr11	120613239	120613400
chr11	120952189	120952710
chr12	3328244	3328617
chr12	27144208	27144526
chr12	27144566	27144791
chr12	27144864	27145163
chr12	27145479	27145974
chr12	27146136	27146508
chr12	27148757	27149026
chr12	34134368	34134567
chr12	55811615	55811813
chr12	55815130	55815297
chr12	55818592	55818793
chr12	55831399	55831577
chr12	57402759	57403074
chr12	72849779	72849952
chr12	74977665	74977858
chr12	84958357	84958635
chr12	85616204	85616665
chr12	101312393	101312710
chr12	103203691	103203902
chr12	103204861	103205201
chr12	103205414	103205660
chr12	103205854	103206139
chr12	105432388	105432513
chr12	105432617	105433102
chr12	120722644	120722965
chr13	5791028	5791371
chr13	13024526	13024758
chr13	35603960	35604290
chr13	48626753	48627186
chr13	48627386	48628232
chr13	48630122	48630454
chr13	54919541	54920144
chr13	54920179	54920618
chr13	54920735	54921066
chr13	54925779	54926123
chr13	58724165	58724406
chr13	64514851	64515512
chr13	93631104	93631413
chr13	98063377	98063633
chr13	104597577	104597742
chr13	105405123	105405348
chr13	114060799	114061033
chr14	19175329	19175641
chr14	22792394	22792920
chr14	22818678	22818917
chr14	76998373	76998646
chr14	78957039	78958696
chr14	115446640	115447040
chr14	115448304	115448805
chr14	120930791	120931030
chr15	27574276	27574779
chr15	36612611	36612960
chr15	36613983	36614817
chr15	58599851	58600245
chr15	62232521	62232857
chr15	68154734	68155143
chr15	68160176	68160586
chr15	68162715	68163167
chr15	68166148	68166911
chr15	72908762	72909263
chr15	85310528	85310814
chr15	85521117	85521434
chr15	85524554	85524875
chr15	85532003	85532345
chr15	85538679	85538962
chr15	85539323	85539976
chr15	85540437	85540654
chr15	100894055	100894380
chr15	100898607	100898810
chr15	100899734	100899905
chr15	100900713	100900918
chr16	11288201	11288457
chr16	17727211	17727628
chr16	64902632	64902900
chr16	84610688	84610972
chr16	84611295	84611497
chr16	93122645	93123158
chr16	93125659	93125914
chr16	93133145	93133365
chr16	93137645	93138060
chr17	22333057	22333436
chr17	22333861	22334076
chr17	22420483	22420761
chr17	22421073	22421351
chr17	29559853	29560056
chr17	29561104	29561557
chr17	29564552	29565325
chr17	64929364	64929633
chr17	64939986	64940204
chr17	83457137	83457494
chr17	84465728	84465979
chr17	84465982	84466160
chr17	84466458	84466663
chr17	84467221	84467422
chr18	5167651	5167892
chr18	34550530	34550909
chr18	36651178	36651528
chr18	43637356	43637612
chr18	50557640	50557870
chr18	61577588	61577913
chr18	61578768	61578988
chr18	69449782	69450007
chr18	70580058	70580276
chr18	75055167	75055581
chr18	75055647	75055958
chr18	89122026	89122296
chr19	8544851	8545164
chr19	8545314	8545810
chr19	8546468	8547058
chr19	8547890	8548180
chr19	9927477	9927704
chr19	11434781	11434994
chr19	11438579	11438790
chr2	11277195	11277384
chr2	11277474	11277692
chr2	27994033	27994434
chr2	30772731	30773639
chr2	44811771	44812326
chr2	60396456	60396745
chr2	60396755	60397056
chr2	75480474	75480663
chr2	98506358	98507530
chr2	121649728	121650015
chr2	121650252	121650896
chr2	148404696	148404942
chr2	152487055	152487273
chr2	153530081	153530315
chr2	153530570	153530946
chr2	156212477	156213891
chr2	166576168	166576382
chr2	172324223	172324466
chr3	26494607	26494803
chr3	69565110	69565343
chr3	96116215	96116548
chr3	108858412	108858628
chr3	127707869	127708144
chr4	8565041	8565316
chr4	11827267	11827604
chr4	12033524	12034073
chr4	12034486	12034808
chr4	12040367	12040768
chr4	33358694	33358983
chr4	44192135	44192367
chr4	44192640	44192866
chr4	44203073	44203263
chr4	44209355	44209570
chr4	44223017	44223399
chr4	54806985	54807176
chr4	61935727	61936610
chr4	83158007	83158256
chr4	83158294	83158490
chr4	83158628	83158842
chr4	122839483	122839846
chr4	123399037	123399479
chr4	123399663	123400127
chr4	130772785	130773100
chr4	135920013	135920284
chr4	139485518	139485730
chr5	30366434	30366879
chr5	65247475	65247692
chr5	67774467	67774695
chr5	77590607	77591084
chr5	105228011	105228348
chr5	105574450	105574687
chr5	105575083	105575295
chr5	105611234	105611382
chr5	141011998	141012211
chr5	141012859	141013106
chr6	22409492	22409853
chr6	23997499	23997727
chr6	28158422	28159065
chr6	28159632	28160075
chr6	31002827	31007031
chr6	31007137	31011772
chr6	31018965	31019780
chr6	49450720	49451140
chr6	72423359	72423529
chr6	108852375	108852732
chr6	121191797	121192168
chr6	143699838	143700122
chr7	27028507	27028827
chr7	35179539	35180258
chr7	35180319	35181873
chr7	35181883	35182122
chr7	35182133	35183445
chr7	35183520	35183816
chr7	35183870	35184150
chr7	35184251	35185134
chr7	35185207	35185411
chr7	35185450	35185990
chr7	35186068	35186317
chr7	35186993	35187298
chr7	66576064	66576301
chr7	66577338	66577696
chr7	66578256	66578524
chr7	81804027	81804252
chr7	81841216	81841485
chr7	81841585	81841791
chr7	81841945	81842118
chr7	81842423	81843058
chr7	82912761	82913413
chr7	99876266	99876735
chr7	99877463	99878341
chr7	99878386	99878848
chr7	99878944	99880376
chr7	99880432	99881493
chr7	111526839	111527542
chr7	111527802	111528164
chr7	111528241	111528459
chr7	111528583	111528927
chr7	111529153	111529375
chr7	111535811	111535995
chr7	111538007	111538229
chr7	111538841	111539120
chr7	111539325	111539552
chr7	111540799	111541038
chr7	111541935	111542400
chr7	118386282	118386509
chr7	125230831	125231006
chr7	133565349	133565582
chr7	145362212	145362416
chr8	4370056	4370301
chr8	19711586	19711848
chr8	35719584	35719816
chr8	35741985	35742195
chr8	47421644	47422225
chr8	47514445	47514653
chr8	47514978	47515187
chr8	47515249	47515883
chr8	47517195	47517498
chr8	47517943	47518402
chr8	53422233	53422463
chr8	96973973	96974225
chr8	96975338	96975510
chr8	96975666	96975873
chr8	96976104	96976988
chr8	96977022	96977662
chr8	96977712	96978240
chr8	96992865	96994405
chr8	96994449	96995171
chr8	96995192	96995567
chr8	114160306	114160684
chr8	116717381	116717631
chr8	125027072	125027809
chr8	125031431	125031942
chr8	125032064	125032751
chr8	125034933	125035191
chr8	125035215	125035668
chr8	125036637	125037107
chr8	125037706	125038259
chr8	125039299	125040025
chr8	125052893	125053367
chr8	125055028	125055582
chr8	125055603	125056123
chr8	125057103	125057579
chr8	125058035	125058355
chr8	125065595	125065998
chr8	125066520	125067881
chr9	7879298	7879788
chr9	7880205	7880492
chr9	7880756	7881057
chr9	24972031	24972231
chr9	44405802	44406121
chr9	44406198	44407118
chr9	62950408	62950625
chr9	77866173	77866436
chr9	82902142	82902401
chr9	82917442	82917714
chr9	89090964	89091325
chr9	110969632	110969863
chr9	121786708	121786932
chrX	18778858	18779314
chrX	18779346	18779786
chrX	18781808	18782099
chrX	18782859	18783534
chrX	18789592	18789964
chrX	32103285	32103585
chrX	39402493	39402662
chrX	69131557	69131787
chrX	106369083	106369448
chrX	106370331	106371168
chrX	153868770	153869570
chrX	153869661	153869966
