# Supplementary material for: A Large Fraction of Extragenic RNA Pol II Transcription Sites Overlap Enhancers
Source: PLoS Biol. 2010 May 11;8(5):e1000384. doi: 10.1371/journal.pbio.1000384 (PMC2867938; doi:10.1371/journal.pbio.1000384)
Supplement: Table S5 — Association between the transcriptional activity of enhancer-type extragenic Pol_II clusters with the expression of the associated protein-coding genes. Extragenic Pol_II peak clusters with a signature of enhancer were assigned to the neighboring protein coding gene when distant less than 20 kb. Transcriptional activity of the assigned coding gene was evaluated on the basis of the Pol_II tag counts at ±500 bp surrounding their TSS in untreated and LPS-treated macrophages. (0.09 MB XLS) [file pbio.1000384.s013.xls]

## Sheet: Data
Dataset	Association with	# Associations	Observed frequency	Expected frequency	Chi-square p-values	Notes
Constitutive Enhancers	Constitutive genes	38	0.436782	0.43	ns
	Induced genes	47	0.54023	0.47	ns
	Repressed genes	2	0.0229885	0.1	p<0.05	under-rep
Induced Enhancers	Constitutive genes	17	0.197674	0.43	p<1e-4	under-rep
	Induced genes	68	0.790698	0.47	p<1e-8	over-rep
	Repressed genes	1	0.0116279	0.1	p<0.05	under-rep
Repressed Enhancers	Constitutive genes	87	0.437186	0.43	ns
	Induced genes	81	0.407035	0.47	ns
	Repressed genes	31	0.155779	0.1	p<0.01	over-rep
